# Supplementary material for: DFT study on Ir-quinoid catalyzed C–H functionalization: new radical reactivity or direct carbene transfer?
Source: Royal Society of Chemistry journal article supplement (doi:10.1039/d1cc04764g), 2021-01-01
Supplement: d1cc04764g1.pdf [file d1cc04764g1.pdf]

*Electronic Supporting Information*

for

DFT Study on Ir-Quinoid Catalyzed C-H Functionalization: New Radical Reactivity or

Direct Carbene Transfer?

Niket Manoj and Garima Jindal\*

Department of Organic Chemistry, Indian Institute of Science, Bangalore 560012 (India)

Email: [gjindal@iisc.ac.in](mailto:gjindal@iisc.ac.in)

## Table of Contents

| <b>Computational Details</b> |                                                                                                                                                                                 | <b>S4-S5</b> |
|------------------------------|---------------------------------------------------------------------------------------------------------------------------------------------------------------------------------|--------------|
| <b>Table S1</b>              | Total Electronic Energies at the SMD <sub>(DCM)</sub> /B3LYP-D3BJ/Def2TZVPP //B3LYP-D3BJ/6-31G(d,p),LANL2DZ(Ir/Ru) for CHD-Quinone Diazide Reactions with Ir(Por)Me and Ru(Por) | S5-S6        |
| <b>Table S2</b>              | Total Electronic Energies at the SMD <sub>(DCM)</sub> /ωB97XD/Def2TZVPP//B3LYP-D3BJ/6-31G(d,p),LANL2DZ(Ir/Ru) for CHD -Quinone Diazide Reactions with Ir(Por)Me and Ru(Por)     | S6           |
| <b>Table S3</b>              | Total Electronic Energies at the SMD <sub>(DCM)</sub> /B3LYP-D3BJ/Def2TZVPP//B3LYP-D3BJ/6-31G(d,p),LANL2DZ(Ir) for S2-DHA System                                                | S7           |
| <b>Table S4</b>              | Total Electronic Energies at the SMD <sub>(DCM)</sub> /ωB97XD/Def2TZVPP//B3LYP-D3BJ/6-31G(d,p),LANL2DZ(Ir) for S2-DHA System                                                    | S7           |
| <b>Table S5</b>              | Total Electronic Energies at the SMD <sub>(DCM)</sub> /B3LYP-D3BJ/Def2TZVPP//B3LYP-D3BJ/6-31G(d,p),LANL2DZ(Ir) for S1-DHA System                                                | S7           |
| <b>Table S6</b>              | Total Electronic Energies at the SMD <sub>(DCM)</sub> /ωB97XD/Def2TZVPP//B3LYP-D3BJ/6-31G(d,p),LANL2DZ(Ir) for S1-DHA System                                                    | S8           |
| <b>Table S7</b>              | Total Electronic Energies at the SMD <sub>(DCM)</sub> /B3LYP-D3BJ/Def2TZVPP//B3LYP-D3BJ/6-31G(d,p),LANL2DZ(Ir) for CHD-Quinone Diazide Reactions with Ir(Por)Cl                 | S8           |
| <b>Table S8</b>              | Total Electronic Energies at the SMD <sub>(DCM)</sub> /ωB97XD/Def2TZVPP//B3LYP-D3BJ/6-31G(d,p),LANL2DZ(Ir) for CHD-Quinone Diazide Reactions with Ir(Por)Cl                     | S8           |
| <b>Table S9</b>              | Relative Free Energies (ΔG) at the SMD <sub>(DCM)</sub> /B3LYP-D3BJ/Def2TZVPP//B3LYP-D3BJ/6-                                                                                    | S9           |

|                  |                                                                                                                                                                                                   |        |
|------------------|---------------------------------------------------------------------------------------------------------------------------------------------------------------------------------------------------|--------|
|                  | 31G(d,p),LANL2DZ(Ir/Ru) for CHD-Quinone Diazide reactions with Ir(Por)Me and Ru(Por)                                                                                                              |        |
| <b>Table S10</b> | Relative Free Energies ( $\Delta G$ ) at the SMD <sub>(DCM)</sub> / $\omega$ B97XD/Def2TZVPP//B3LYP-D3BJ/6-31G(d,p),LANL2DZ(Ir/Ru) for CHD – Quinone Diazide Reactions with Ir(Por)Me and Ru(Por) | S9-S10 |
| <b>Table S11</b> | Relative Free Energies ( $\Delta G$ ) at the SMD <sub>(DCM)</sub> /B3LYP-D3BJ/Def2TZVPP//B3LYP-D3BJ/6-31G(d,p),LANL2DZ(Ir) for S2-DHA System                                                      | S10    |
| <b>Table S12</b> | Relative Free Energies ( $\Delta G$ ) at the SMD <sub>(DCM)</sub> / $\omega$ B97XD/Def2TZVPP//B3LYP-D3BJ/6-31G(d,p),LANL2DZ(Ir) for S2-DHA System                                                 | S10    |
| <b>Table S13</b> | Relative Free Energies ( $\Delta G$ ) at the SMD <sub>(DCM)</sub> /B3LYP-D3BJ/Def2TZVPP//B3LYP-D3BJ/6-31G(d,p),LANL2DZ(Ir) for S1-DHA System                                                      | S10    |
| <b>Table S14</b> | Relative Free Energies ( $\Delta G$ ) at the SMD <sub>(DCM)</sub> / $\omega$ B97XD/Def2TZVPP//B3LYP-D3BJ/6-31G(d,p),LANL2DZ(Ir) for S1-DHA System                                                 | S11    |
| <b>Table S15</b> | Relative Free Energies ( $\Delta G$ ) at the SMD <sub>(DCM)</sub> /B3LYP-D3BJ/Def2TZVPP//B3LYP-D3BJ/6-31G(d,p),LANL2DZ(Ir) for CHD-Quinone Diazide Reactions with Ir(Por) <sub>Cl</sub>           | S11    |
| <b>Table S16</b> | Relative Free Energies ( $\Delta G$ ) at the SMD <sub>(DCM)</sub> / $\omega$ B97XD/Def2TZVPP//B3LYP-D3BJ/6-31G(d,p),LANL2DZ(Ir) for CHD-Quinone Diazide reactions with Ir(Por) <sub>Cl</sub>      | S11    |
| <b>Table S17</b> | Relative Free Energies ( $\Delta G$ ) of TS(B-D) and TS(B-C) using Different Hybrid and Pure Functionals                                                                                          | S12    |
| <b>Table S18</b> | Distortion-Interaction (Activation-Strain) Results                                                                                                                                                | S12    |
| <b>Table S19</b> | Kinetic Isotope Effect                                                                                                                                                                            | S13    |
| <b>Table S20</b> | Energy Decomposition Analysis of ) <b>TS(B-D)</b> and <sup>oss</sup> <b>TS(B-C)</b>                                                                                                               | S17    |
| <b>Table S21</b> | Mulliken Spin Analysis of select Stationary Points                                                                                                                                                | S17    |
| <b>Table S22</b> | Mulliken Charges of ion-pairs                                                                                                                                                                     | S18    |

|                  |                                                                                                |          |
|------------------|------------------------------------------------------------------------------------------------|----------|
| <b>Table S23</b> | Important Geometric parameters of Ru TSs optimised at 6-31G(d,p) and 6-31+G(d,p) basis sets    | S19-S20  |
| <b>Fig S1</b>    | Optimised Structures of Important Stationary Points                                            | S13-S14  |
| <b>Fig S2</b>    | Intrinsic Reaction Coordinate (IRC) and corresponding Gradient plots for key Transition States | S14-S15  |
| <b>Fig S3</b>    | Reverse Intrinsic Reaction Coordinate (IRC) plots for key Transition States                    | S16      |
| <b>Fig S4</b>    | Energy Decomposition Analysis                                                                  | S16      |
| <b>Fig S5</b>    | Mulliken Charges on reactive centres of Ir-quinoid species                                     | S19      |
| <b>Fig S6</b>    | Overlaid images of Ru TSs optimised at the 6-31G(d,p) and 6-31+G(d,p) basis sets               | S19      |
| <b>Scheme S1</b> | Formation of the TEMPO adduct with CHD                                                         | S20      |
|                  | <b>References</b>                                                                              | S21-S22  |
|                  | <b>Coordinates of Optimised Stationary Points</b>                                              | S22-S106 |

## Computational Details

We modelled the electronic structure and thermochemistry of the mechanistic cycle using Gaussian16 software.<sup>1</sup> We have performed all geometry optimisations using the hybrid functional B3LYP, while using the standard split valence Pople's basis set 6-31G(d,p) for all atoms except Ir, Ru and Br.<sup>2,3</sup> For these heavy elements, we used the LANL2DZ basis with an effective core potential (ECP).<sup>4</sup> To compute the wavefunction for open-shell singlet systems, we used the guess=(read,mix) keyword on a triplet wavefunction generated in a previous calculation.<sup>5</sup> The internal stability of the wavefunctions was verified using the opt=stable keyword. Our choice of functional was based upon previous successful studies on similar

systems. The use of unrestricted B3LYP functional with standard split valence Pople's basis set have been shown to give reliable geometries for stationary point calculations on transition metal carbene systems. We carried out frequency analysis on these stationary points to verify their nature (minima/saddle point) and obtain thermal corrections to the electronic energy. For the transition states, we performed IRC (Intrinsic Reaction Coordinate) calculations to link the TS with its corresponding intermediates, which proved to be really insightful in a few cases where the fate of the product arising from a Transition State was not intuitively obvious.<sup>6</sup> We have performed single point calculations on the optimised structures using the Karlsruhe basis set Def2TZVPP for all systems except for the ones with a Ru centre.<sup>7</sup> In the case of Ru, the wavefunction for the crucial open-shell singlet TS (<sup>OSS</sup>TS(B-C)) generated from Def2TZVPP was converging to a closed shell singlet function, thereby simulating a hydride transfer instead of the desired Hydrogen Atom Transfer. As a result, we had to use the diffuse Pople's basis set 6-31+G(d,p) for all single point calculations on Ru systems. All these single points were computed using both B3LYP-D3BJ and  $\omega$ B97XD functionals, with an SMD (solvation model density) solvation model to simulate the solvation effects of DCM (dichloromethane).<sup>8</sup> The thermal corrections obtained from the geometry optimisations were added to the single point electronic energies to give the thermochemical values (in this case, the Free Energies) for the transition states. For the two important transition States <sup>OSS</sup>TS(B-C) and TS(B-D), we verified our results across different hybrid and pure functionals. For the Kinetic Isotope effect barrier calculations, we reoptimized the stationary point using the Opt=Tight and Integral=Superfine criteria for more accurate values.

For the Distortion-Interaction (Activation-Strain) analysis,<sup>9</sup> we calculated the electronic energies of the distorted and ground state fragments at the SMD(DCM)/B3LYP-D3BJ/Def2TZVPP level of theory. The nature of this interaction energy was analysed using the Energy Decomposition Analysis feature from the ADF (Amsterdam Density Functional) software. The wavefunction was computed at the B3LYP-D3/TZP level of theory.<sup>11</sup>

**Table S1.** Total Electronic Energies (E) (in a.u) at the SMD(DCM)/B3LYP-D3BJ/Def2TZVPP//B3LYP-D3BJ/6-31G(d,p),LANL2DZ(Ir/Ru) for CHD-Quinone Diazide Reactions with Ir(Por)Me and Ru(Por)<sup>a</sup>

|                  | CSS | OSS | Triplet |
|------------------|-----|-----|---------|
| Stationary Point | E   | E   | E       |

|                                |              |              |              |
|--------------------------------|--------------|--------------|--------------|
| <b>A</b>                       | -2406.622269 | _ b          | _ c          |
| <b>TS(A-B)</b>                 | -2406.581318 | _ b          | _ c          |
| <b>B</b>                       | -2530.601884 | -2530.587631 | -2530.593961 |
| <b>C</b>                       | -2530.616451 | -2530.618917 | -2530.618932 |
| <b>TS(C-P)</b>                 | -2530.612148 | _ b          | -2530.568017 |
| <b>P</b>                       | -2530.708197 | _ b          | -2530.64188  |
| <b>TS(B-D)</b>                 | -2530.578743 | _ b          | _ d          |
| <b>D</b>                       | -2530.656614 | _ b          | _ d          |
| <b>TS(B-E)</b>                 | _ e          | _ b          | -2530.566533 |
| <b>E</b>                       | _ e          | _ b          | -2530.618894 |
| <b>CSS<sub>B</sub>Ru</b>       | -6248.546341 | -            | -            |
| <b>OSS<sub>TS(B-C)</sub>Ru</b> | -            | -6248.527782 | -            |
| <b>CSS<sub>TS(B-D)</sub>Ru</b> | -6248.533715 | -            | -            |

<sup>a</sup>6-31+G(d,p) was used in place of Def2TZVPP for Ru.

<sup>b</sup>OSS converges to CSS.

<sup>c</sup>Quinone diazide dissociates into a high energy free carbene in its triplet state, without metal involvement

<sup>d</sup>**TS(B-D)** goes to **TS(B-E)** in a triplet state.

<sup>e</sup>**TS(B-E)** goes to a CSS **TS(B-D)** in singlet state.

**Table S2.** Total Electronic Energies (E) (in a.u) at the SMD<sub>(DCM)</sub>/B3LYP-D3BJ/Def2TZVPP//B3LYP-D3BJ/6-31G(d,p),LANL2DZ(Ir/Ru) for CHD-Quinone Diazide Reactions with Ir(Por)Me and Ru(Por)<sup>a</sup>

|                                | CSS          | OSS          | Triplet      |
|--------------------------------|--------------|--------------|--------------|
| <b>Stationary Point</b>        |              |              |              |
| <b>A</b>                       | -2405.610157 | _ b          | _ c          |
| <b>TS(A-B)</b>                 | -2405.56319  | _ b          | _ c          |
| <b>B</b>                       | -2529.519137 | -2529.504970 | -2529.519543 |
| <b>TS(B-C)</b>                 | -2529.450363 | -2529.480896 | -2529.479208 |
| <b>C</b>                       | -2529.537387 | -2529.543959 | -2529.543988 |
| <b>TS(C-P)</b>                 | -2529.531596 | _ b          | -2529.49948  |
| <b>P</b>                       | -2529.644702 | _ b          | -2529.575152 |
| <b>TS(B-D)</b>                 | -2529.497292 | _ b          | _ d          |
| <b>D</b>                       | -2529.59259  | _ b          | _ d          |
| <b>TS(B-E)</b>                 | _ e          | _ d          | -2529.485957 |
| <b>E</b>                       | _ e          | _ d          | -2529.54384  |
| <b>CSS<sub>B</sub>Ru</b>       | -6247.2651   | -            | -            |
| <b>OSS<sub>TS(B-C)</sub>Ru</b> | -            | -6247.244361 | -            |
| <b>CSS<sub>TS(B-D)</sub>Ru</b> | -6247.247965 | -            | -            |

<sup>a</sup>6-31+G(d,p) was used in place of Def2TZVPP for Ru.

<sup>b</sup>OSS converges to CSS.

<sup>c</sup>Quinone diazide dissociates into a high energy free carbene in its triplet state, without metal involvement

<sup>d</sup>**TS(B-D)** goes to **TS(B-E)** in a triplet state.

<sup>e</sup>**TS(B-E)** goes to a CSS **TS(B-D)** in singlet state.

**Table S3.** Total Electronic Energies (E) (in a.u) at the SMD<sub>(DCM)</sub>/B3LYP-D3BJ/Def2TZVPP//B3LYP-D3BJ/6-31G(d,p),LANL2DZ(Ir) for S2-DHA System

| Stationary Point                                | E            |
|-------------------------------------------------|--------------|
| <b>B</b> <sub>DHA-S2</sub>                      | -2688.727901 |
| <sup>CSS</sup> <b>TS(B-E)</b> <sub>DHA-S2</sub> | -2688.734178 |
| <sup>OSS</sup> <b>TS(B-C)</b> <sub>DHA-S2</sub> | -2688.694708 |
| <sup>CSS</sup> <b>E</b> <sub>DHA-S2</sub>       | -2688.775424 |
| <b>P1</b> <sub>DHA-S2</sub>                     | -2688.801671 |
| <b>P2</b> <sub>DHA-S2</sub>                     | -2688.828265 |

**Table S4.** Total Electronic Energies (E) (in a.u) at the SMD<sub>(DCM)</sub>/ωB97XD/Def2TZVPP//B3LYP-D3BJ/6-31G(d,p), LANL2DZ(Ir) for S2-DHA System

| Stationary Point                                | E            |
|-------------------------------------------------|--------------|
| <b>B</b> <sub>DHA-S2</sub>                      | -2687.56082  |
| <sup>CSS</sup> <b>TS(B-E)</b> <sub>DHA-S2</sub> | -2687.56087  |
| <sup>OSS</sup> <b>TS(B-C)</b> <sub>DHA-S2</sub> | -2687.50398  |
| <sup>CSS</sup> <b>E</b> <sub>DHA-S2</sub>       | -2687.599455 |
| <b>P2</b> <sub>DHA-S2</sub>                     | -2687.660133 |

**Table S5.** Total Electronic Energies (E) (in a.u) at the SMD<sub>(DCM)</sub>/B3LYP-D3BJ/Def2TZVPP//B3LYP-D3BJ/6-31G(d,p),LANL2DZ(Ir) for S1-DHA System

| Stationary Point                                | E            |
|-------------------------------------------------|--------------|
| <b>B</b> <sub>DHA-S1</sub>                      | -2838.055426 |
| <sup>3</sup> <b>TS(B-E)</b> <sub>DHA-S1</sub>   | -2838.043163 |
| <sup>CSS</sup> <b>TS(B-E)</b> <sub>DHA-S1</sub> | -2838.052501 |
| <sup>3</sup> <b>TS(B-C)</b> <sub>DHA-S1</sub>   | -2838.04022  |
| <sup>OSS</sup> <b>TS(B-C)</b> <sub>DHA-S1</sub> | -2838.043379 |
| <sup>CSS</sup> <b>E</b> <sub>DHA-S1</sub>       | -2838.072645 |
| <b>P1</b> <sub>DHA-S1</sub>                     | -2838.104226 |
| <b>P2</b> <sub>DHA-S1</sub>                     | -2838.150794 |

**Table S6.** Total Electronic Energies (E) (in a.u) at the SMD<sub>(DCM)</sub>/ωB97XD/Def2TZVPP/B3LYP-D3BJ/6-31G(d,p),LANL2DZ (Ir) for S1-DHA System

| Stationary Point                                | E            |
|-------------------------------------------------|--------------|
| <b>B</b> <sub>DHA-S1</sub>                      | -2836.827972 |
| <sup>3</sup> <b>TS(B-E)</b> <sub>DHA-S1</sub>   | -2836.819998 |
| <sup>CSS</sup> <b>TS(B-E)</b> <sub>DHA-S1</sub> | -2836.828031 |
| <sup>3</sup> <b>TS(B-C)</b> <sub>DHA-S1</sub>   | -2836.813502 |
| <sup>OSS</sup> <b>TS(B-C)</b> <sub>DHA-S1</sub> | -2836.816137 |
| <sup>CSS</sup> <b>E</b> <sub>DHA-S1</sub>       | -2836.848995 |
| <b>P1</b> <sub>DHA-S1</sub>                     | -2836.895952 |
| <b>P2</b> <sub>DHA-S1</sub>                     | -2836.929848 |

**Table S7.** Total Electronic Energies (E) (in a.u) at the SMD<sub>(DCM)</sub>// B3LYP-D3BJ/Def2TZVPP//B3LYP-D3BJ/6-31G(d,p), LANL2DZ(Ir) for Ir(Por)Cl System

| Stationary Point                                    | E            |
|-----------------------------------------------------|--------------|
| <sup>CSS</sup> <b>A</b> <sub>Cl</sub>               | -2826.919044 |
| <sup>CSS</sup> <b>A'</b> <sub>Cl</sub> <sup>a</sup> | -2826.937853 |
| <sup>CSS</sup> <b>TS(A-B)</b> <sub>Cl</sub>         | -2826.931274 |
| <sup>CSS</sup> <b>B</b> <sub>Cl</sub>               | -2950.960548 |
| <sup>CSS</sup> <b>TS(B-D)</b> <sub>Cl</sub>         | -2950.942093 |
| <sup>CSS</sup> <b>D</b> <sub>Cl</sub>               | -2950.974157 |

<sup>a</sup> Tetrahedral intermediate formed between the carbene and the Ir catalyst.

**Table S8.** Total Electronic Energies (E) (in a.u) at the SMD<sub>(DCM)</sub>// ωB97XD/Def2TZVPP//B3LYP-D3BJ/6-31G(d,p),LANL2DZ(Ir) for Ir(Por)Cl System

| Stationary Point                                    | E            |
|-----------------------------------------------------|--------------|
| <sup>CSS</sup> <b>A</b> <sub>Cl</sub>               | -2825.905486 |
| <sup>CSS</sup> <b>A'</b> <sub>Cl</sub> <sup>a</sup> | -2825.923991 |
| <sup>CSS</sup> <b>TS(A-B)</b> <sub>Cl</sub>         | -2825.913489 |
| <sup>CSS</sup> <b>B</b> <sub>Cl</sub>               | -2949.879161 |
| <sup>CSS</sup> <b>TS(B-D)</b> <sub>Cl</sub>         | -2949.860731 |

<sup>a</sup> Tetrahedral intermediate formed between the carbene and the Ir catalyst.



**Table S9.** Relative Free Energies ( $\Delta G$ ) (in kcal/mol) at the SMD<sub>(DCM)</sub>/B3LYP-D3BJ/Def2TZVPP//B3LYP-D3BJ/6-31G(d,p),LANL2DZ(Ir/Ru) for CHD-Quinone Diazide reactions with Ir(Por)Me and Ru(Por)<sup>a</sup>

| Stationary Point                          | CSS<br>$\Delta G$ | OSS<br>$\Delta G$ | Triplet<br>$\Delta G$ |
|-------------------------------------------|-------------------|-------------------|-----------------------|
| <b>A</b>                                  | 0                 | <sup>b</sup>      | <sup>c</sup>          |
| <b>TS(A-B)</b>                            | 25.3              | <sup>b</sup>      | <sup>c</sup>          |
| <b>B</b>                                  | -4.3              | -2.8              | -2.7                  |
| <b>TS(B-C)</b>                            | 18.7              | 12.2              | 12.6                  |
| <b>C</b>                                  | -12.3             | -15.8             | -16.5                 |
| <b>TS(C-P)</b>                            | -8.1              | <sup>b</sup>      | 18.0                  |
| <b>P</b>                                  | -66.8             | <sup>b</sup>      | -28.2                 |
| <b>TS(B-D)</b>                            | 8.9               | <sup>b</sup>      | <sup>d</sup>          |
| <b>D</b>                                  | -37.7             | <sup>b</sup>      | <sup>d</sup>          |
| <b>TS(B-E)</b>                            | <sup>e</sup>      | <sup>e</sup>      | 13.4                  |
| <b>E</b>                                  | <sup>e</sup>      | <sup>e</sup>      | -19.5                 |
| <sup>c</sup> <b>TS(B-C)</b> <sub>Ru</sub> | 0                 | -                 | -                     |
| <sup>c</sup> <b>TS(B-D)</b> <sub>Ru</sub> | 19.9              | 18.4              | -                     |

<sup>a</sup>6-31+G(d,p) was used in place of Def2TZVPP for Ru

<sup>b</sup>OSS converges to CSS

<sup>c</sup>Quinone diazide dissociates into a high energy free carbene in its triplet state, without metal involvement

<sup>d</sup>**TS(B-D)** goes to **TS(B-E)** in a triplet state

<sup>e</sup>**TS(B-E)** goes to a CSS **TS(B-D)** in singlet state

**Table S10.** Relative Free Energies ( $\Delta G$ ) (in kcal/mol) at the SMD<sub>(DCM)</sub>/ωB97XD/Def2TZVPP//B3LYP-D3BJ/6-31G(d,p), LANL2DZ(Ir/Ru) for CHD-Quinone Diazide reactions with Ir(Por)Me and Ru(Por)<sup>a</sup>

| Stationary Point                          | CSS<br>$\Delta G$ | OSS<br>$\Delta G$ | Triplet<br>$\Delta G$ |
|-------------------------------------------|-------------------|-------------------|-----------------------|
| <b>A</b>                                  | 0                 | <sup>b</sup>      | <sup>c</sup>          |
| <b>TS(A-B)</b>                            | 29.1              | <sup>b</sup>      | <sup>c</sup>          |
| <b>B</b>                                  | 2.3               | 3.8               | 2.6                   |
| <b>TS(B-C)</b>                            | 27.7              | 20.2              | 20.3                  |
| <b>C</b>                                  | -7.9              | -14.1             | -14.7                 |
| <b>TS(C-P)</b>                            | -2.8              | <sup>b</sup>      | 15.7                  |
| <b>P</b>                                  | -72.3             | <sup>b</sup>      | -31.6                 |
| <b>TS(B-D)</b>                            | 14.8              | <sup>b</sup>      | <sup>d</sup>          |
| <b>D</b>                                  | -42.8             | <sup>b</sup>      | <sup>d</sup>          |
| <b>TS(B-E)</b>                            | <sup>e</sup>      | <sup>e</sup>      | 18.7                  |
| <b>E</b>                                  | <sup>e</sup>      | <sup>e</sup>      | -17.7                 |
| <sup>c</sup> <b>TS(B-C)</b> <sub>Ru</sub> | 0                 | -                 | -                     |
| <sup>c</sup> <b>TS(B-D)</b> <sub>Ru</sub> | 19.7              | 19.7              | -                     |

<sup>a</sup>6-31+G(d,p) was used in place of Def2TZVPP for Ru.

<sup>b</sup>OSS converges to CSS.

<sup>c</sup>Quinone diazide dissociates into a high energy free carbene in its triplet state, without metal involvement.

<sup>d</sup>**TS(B-D)** goes to **TS(B-E)** in a triplet state.

<sup>e</sup>**TS(B-E)** goes to a CSS **TS(B-D)** in singlet state.

**Table S11.** Relative Free Energies ( $\Delta G$ ) (in kcal/mol) at the SMD<sub>(DCM)</sub>/B3LYP-D3BJ/Def2TZVPP'/B3LYP-D3BJ/6-31G(d,p), LANL2DZ(Ir) for S2-DHA System

| Stationary Point                         | $\Delta G$ |
|------------------------------------------|------------|
| <b>BDHA-S2</b>                           | 0          |
| CSS <sup>TS(B-E)</sup> <sub>DHA-S2</sub> | 10.1       |
| OSS <sup>TS(B-C)</sup> <sub>DHA-S2</sub> | 32.8       |
| CSS <sup>E</sup> <sub>DHA-S2</sub>       | -16.9      |
| <b>P1</b> <sub>DHA-S2</sub>              | -44.4      |
| <b>P2</b> <sub>DHA-S2</sub>              | -65.8      |

**Table S12.** Relative Free Energies ( $\Delta G$ ) (in kcal/mol) at the SMD<sub>(DCM)</sub>/ $\omega$ B97XD/Def2TZVPP'/B3LYP-D3BJ/6-31G(d,p), LANL2DZ(Ir) for S2-DHA System

| Stationary Point                         | $\Delta G$ |
|------------------------------------------|------------|
| <b>BDHA-S2</b>                           | 0          |
| CSS <sup>TS(B-E)</sup> <sub>DHA-S2</sub> | 14.0       |
| OSS <sup>TS(B-C)</sup> <sub>DHA-S2</sub> | 47.6       |
| CSS <sup>E</sup> <sub>DHA-S2</sub>       | -11.3      |
| <b>P1</b> <sub>DHA-S2</sub>              | -50.5      |
| <b>P2</b> <sub>DHA-S2</sub>              | -65.1      |

**Table S13.** Relative Free Energies ( $\Delta G$ ) (in kcal/mol) at the SMD<sub>(DCM)</sub>/B3LYP-D3BJ/Def2TZVPP'/B3LYP-D3BJ/6-31G(d,p), LANL2DZ(Ir) for S1-DHA System

| Stationary Point                              | $\Delta G$ |
|-----------------------------------------------|------------|
| <b>BDHA-S1</b>                                | 0          |
| <sup>3</sup> <b>TS(B-E)</b> <sub>DHA-S1</sub> | 18.4       |
| CSS <sup>TS(B-E)</sup> <sub>DHA-S1</sub>      | 15.8       |
| <sup>3</sup> <b>TS(B-C)</b> <sub>DHA-S1</sub> | 19.8       |
| OSS <sup>TS(B-C)</sup> <sub>DHA-S1</sub>      | 18.7       |
| CSS <sup>E</sup> <sub>DHA-S1</sub>            | 2.0        |
| <b>P1</b> <sub>DHA-S1</sub>                   | -27.9      |

**Table S14.** Relative Free Energies ( $\Delta G$ ) (in kcal/mol) at the SMD<sub>(DCM)</sub>/ $\omega$ B97XD/Def2TZVPP//B3LYP-D3BJ/6-31G(d,p), LANL2DZ(Ir) for S1-DHA System

| Stationary Point                                | $\Delta G$ |
|-------------------------------------------------|------------|
| <b>B</b> <sub>DHA-S1</sub>                      | 0          |
| <sup>3</sup> <b>TS(B-E)</b> <sub>DHA-S1</sub>   | 15.7       |
| <sup>CSS</sup> <b>TS(B-E)</b> <sub>DHA-S1</sub> | 13.1       |
| <sup>3</sup> <b>TS(B-C)</b> <sub>DHA-S1</sub>   | 19.3       |
| <sup>OSS</sup> <b>TS(B-C)</b> <sub>DHA-S1</sub> | 18.6       |
| <sup>CSS</sup> <b>E</b> <sub>DHA-S1</sub>       | -0.4       |
| <b>P1</b> <sub>DHA-S1</sub>                     | -39.9      |
| <b>P2</b> <sub>DHA-S1</sub>                     | -64.4      |

**Table S15.** Relative Free Energies ( $\Delta G$ ) (in kcal/mol) at the SMD<sub>(DCM)</sub>//B3LYP-D3BJ/Def2TZVPP//B3LYP-D3BJ/6-31G(d,p), LANL2DZ(Ir) for Ir(Por)Cl system

| Stationary Point                                    | $\Delta G$ |
|-----------------------------------------------------|------------|
| <sup>CSS</sup> <b>A</b> <sub>Cl</sub>               | 0          |
| <sup>CSS</sup> <b>A'</b> <sub>Cl</sub> <sup>a</sup> | 3.7        |
| <sup>CSS</sup> <b>TS(A-B)</b> <sub>Cl</sub>         | 8.1        |
| <sup>CSS</sup> <b>B</b> <sub>Cl</sub>               | -28.7      |
| <sup>CSS</sup> <b>TS(B-D)</b> <sub>Cl</sub>         | -19.0      |
| <sup>CSS</sup> <b>D</b> <sub>Cl</sub>               | -35.8      |

<sup>a</sup> Tetrahedral intermediate formed between the carbene and the Ir catalyst.

**Table S16.** Relative Free Energies ( $\Delta G$ ) (in kcal/mol) at the SMD<sub>(DCM)</sub>/ $\omega$ B97XD/Def2TZVPP//B3LYP-D3BJ/6-31G(d,p), LANL2DZ(Ir) for Ir(Por)Cl System

| Stationary Point                                    | $\Delta G$ |
|-----------------------------------------------------|------------|
| <sup>CSS</sup> <b>A</b> <sub>Cl</sub>               | 0          |
| <sup>CSS</sup> <b>A'</b> <sub>Cl</sub> <sup>a</sup> | 3.9        |
| <sup>CSS</sup> <b>TS(A-B)</b> <sub>Cl</sub>         | 10.8       |
| <sup>CSS</sup> <b>B</b> <sub>Cl</sub>               | -24.4      |
| <sup>CSS</sup> <b>TS(B-D)</b> <sub>Cl</sub>         | -14.7      |
| <sup>CSS</sup> <b>D</b> <sub>Cl</sub>               | -40.4      |

<sup>a</sup> Tetrahedral intermediate formed between the carbene and the Ir catalyst.

**Table S17.** Relative Free Energies ( $\Delta G$ ) (in kcal/mol) of **TS(B-D)** and <sup>oss</sup>**TS(B-C)** using different Hybrid and Pure Functionals<sup>a</sup>

| Stationary Point | TS(B-D)    | <sup>oss</sup> TS(B-C) |
|------------------|------------|------------------------|
|                  | $\Delta G$ | $\Delta G$             |
| B3LYP-D3BJ       | 0          | 3.3                    |
| $\omega$ B97XD   | 0          | 5.5                    |
| M06              | 0          | 10.3                   |
| BLYP             | 0          | 3.1                    |
| BP86             | 0          | 5.2                    |

<sup>a</sup>All single point energy calculations are done with Def2TZVPP using SMD<sub>(DCM)</sub>.

**Table S18.** Distortion-Interaction (Activation-Strain) Analysis<sup>a</sup>

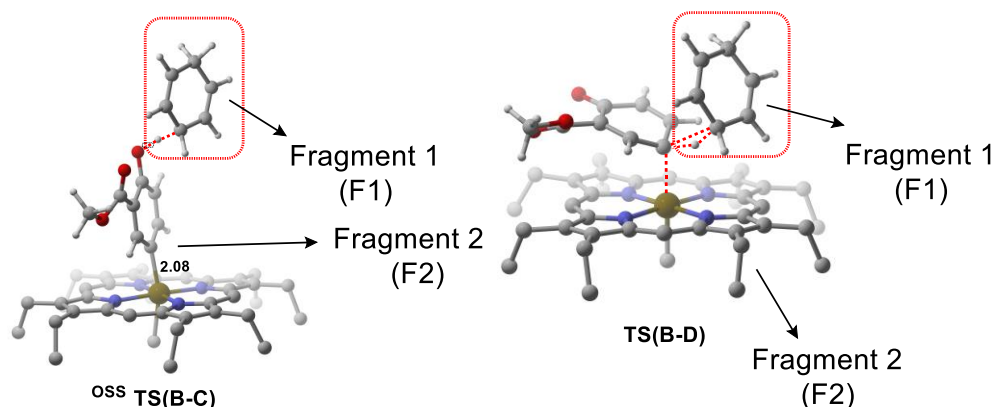

| Stationary Point   | TS(B-D) | <sup>oss</sup> TS(B-C) |
|--------------------|---------|------------------------|
| Distortion in F1   | 15.2    | 18.9                   |
| Distortion in F2   | 17.6    | 4.3                    |
| Total Distortion   | 32.8    | 23.2                   |
| Interaction Energy | 18.3    | 0.6                    |

<sup>a</sup>Above electronic energies are given in kcal/mol, relative to the separated optimized F1 and F2 fragments.

For the KIE study, we reoptimised the stationary points **TS(B-D)**, <sup>3</sup>**TS(B-C)**, <sup>oss</sup>**TS(B-C)** using the criteria opt=tight and Integral=SuperFine for more accurate thermokinetic values. We performed free energy calculation on these TSs with the standard CHD and its d-8 deuterated analogue. We got the free energy barriers as shown in Table S19.

**Table S19.** Kinetic Isotope Effect<sup>a,b</sup>

|                                          | <b>h-8 1,4 CHD</b> | <b>d-8 1,4 CHD</b> |
|------------------------------------------|--------------------|--------------------|
| <b>Stationary Point</b>                  | $\Delta G$         | $\Delta G$         |
| <b>TS(B-D)</b>                           | 8.24               | 8.96               |
| <b><sup>o</sup>SS<sup>†</sup>TS(B-C)</b> | 16.62              | 17.74              |
| <b><sup>3</sup>TS(B-C)</b>               | 17.12              | 18.23              |

<sup>a</sup>Relative free energies are given in kcal/mol.

<sup>b</sup>Barriers are calculated at the B3LYP/6-31G(d,p) level of theory.

These barriers correspond to the following KIE:

**TS(B-D):** 3.3  
**<sup>o</sup>SS<sup>†</sup>TS(B-C):** 6.6  
**<sup>3</sup>TS(B-C):** 6.5

Experimental KIE is  $3.2 \pm 0.3$

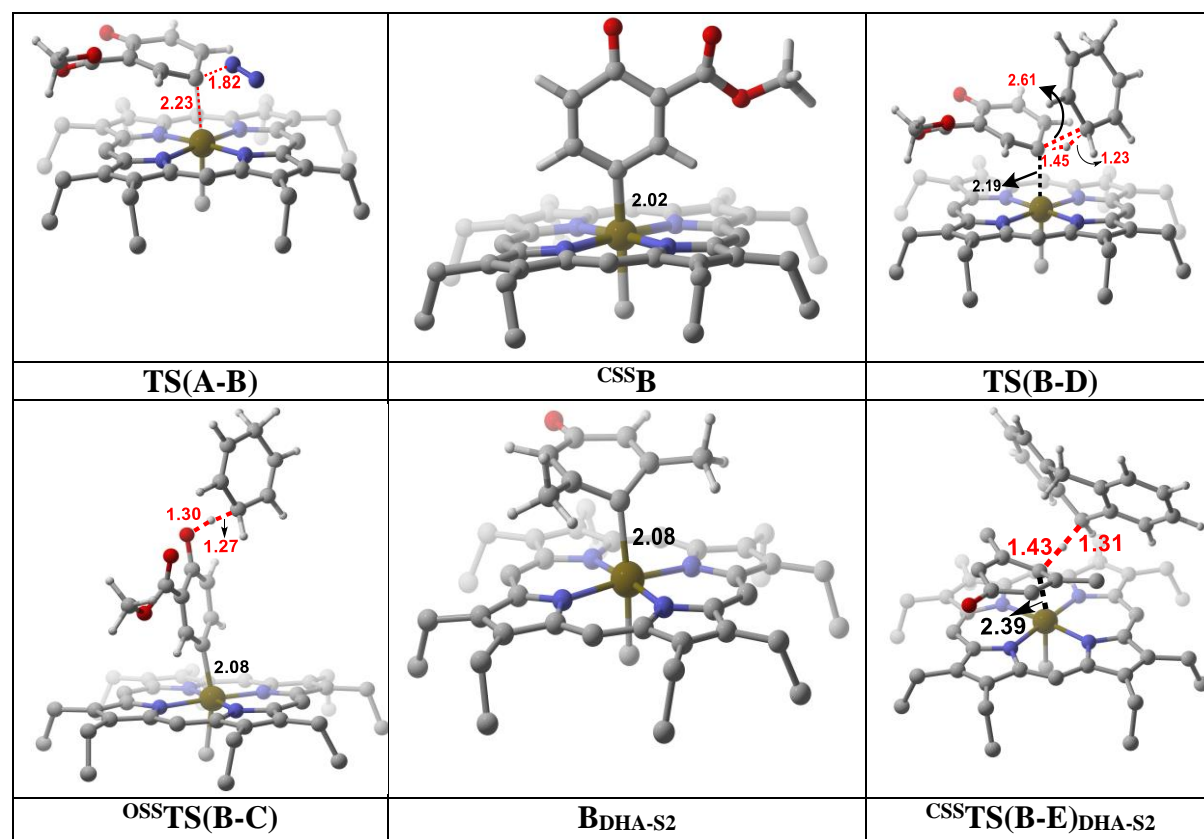

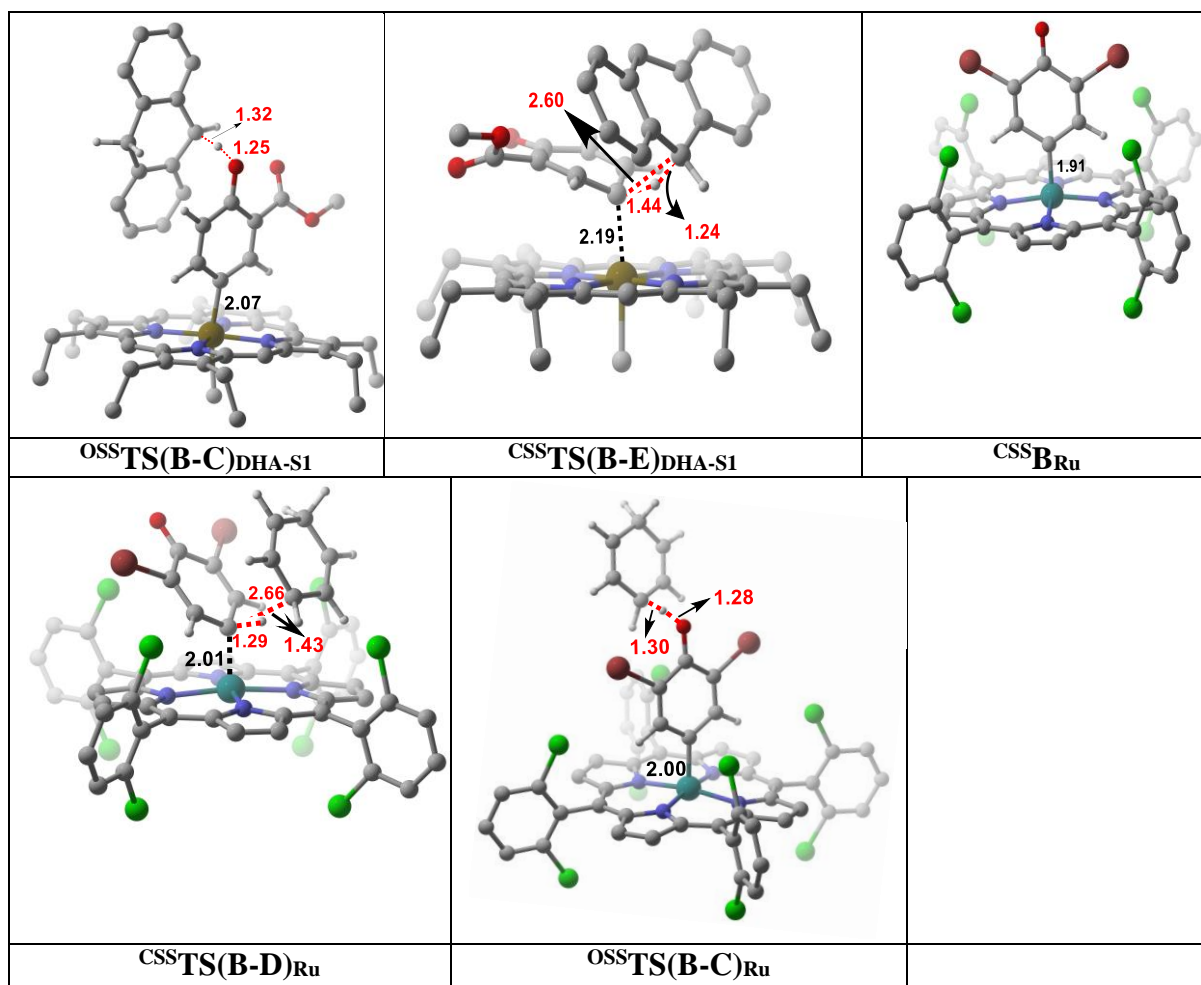

**Fig. S1.** Geometries of important optimised structures. Distances are in Å.

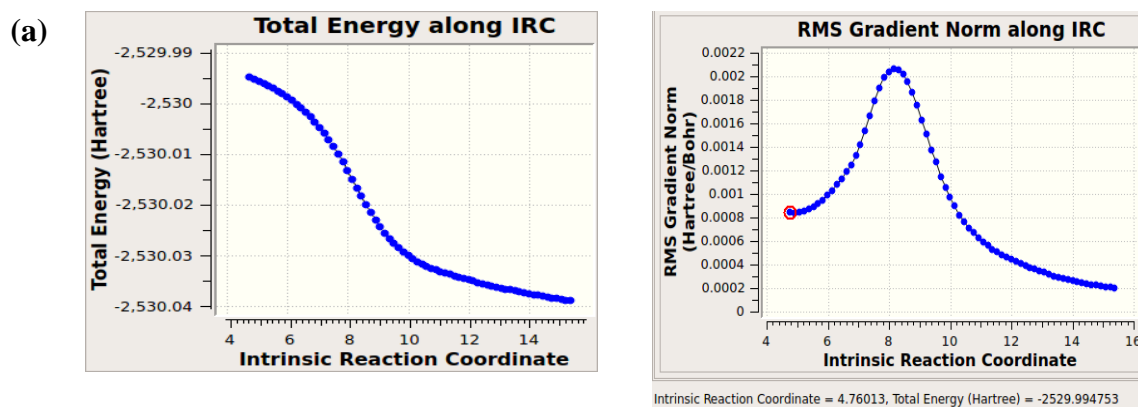

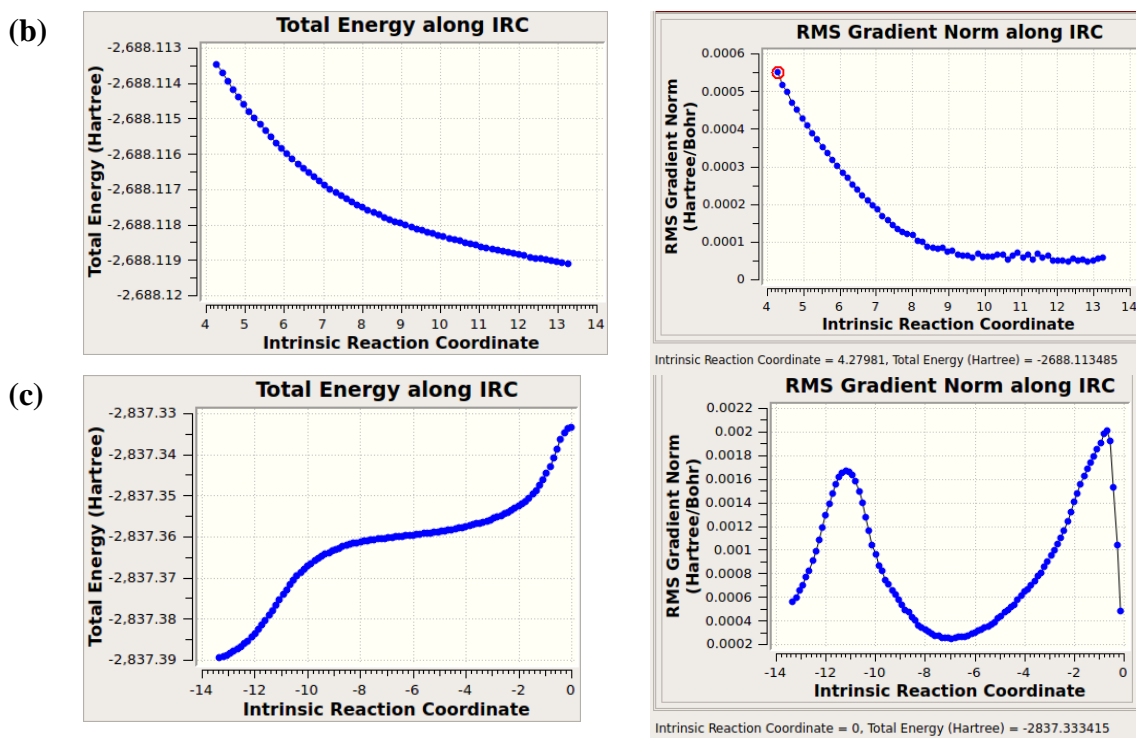

**Fig. S2.** IRC and gradient plot for (a) **TS(B-D)**, (b) **TS(B-E)<sub>DHA-S2</sub>** and (c) **TS(B-E)<sub>DHA-S1</sub>**.

For **TS(B-D)**, the IRC proceeds towards the C-H insertion product, monotonously decreasing in energy throughout the course of its IRC, as can be seen from its gradient plot. For **TS(B-E)<sub>DHA-S2</sub>** the IRC proceeds towards the ion pair product unlike in the IRC for **TS(B-D)** with the C(carbene) and C(DHA) moving apart while the C(carbene)-H bond is forming. For **TS(B-E)<sub>DHA-S1</sub>**, the IRC suggests the formation of a ‘hidden intermediate’, as it passes through a region where its gradient is nearly zero, thereby almost leading to a stationary point corresponding to an ion pair.<sup>10</sup> We stabilised this intermediate from this geometry by optimising it in solvent phase to generate the ion pair.

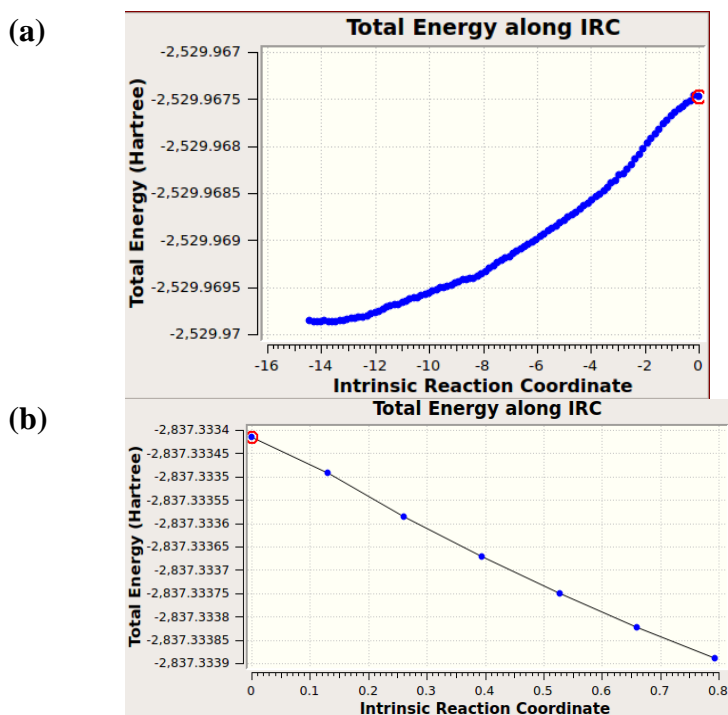

**Fig. S3.** Reverse IRC plot for C-H insertion (a) **TS(B-D)** and hydride transfer (b) **TS(B-E)<sub>DHA-S1</sub>**.

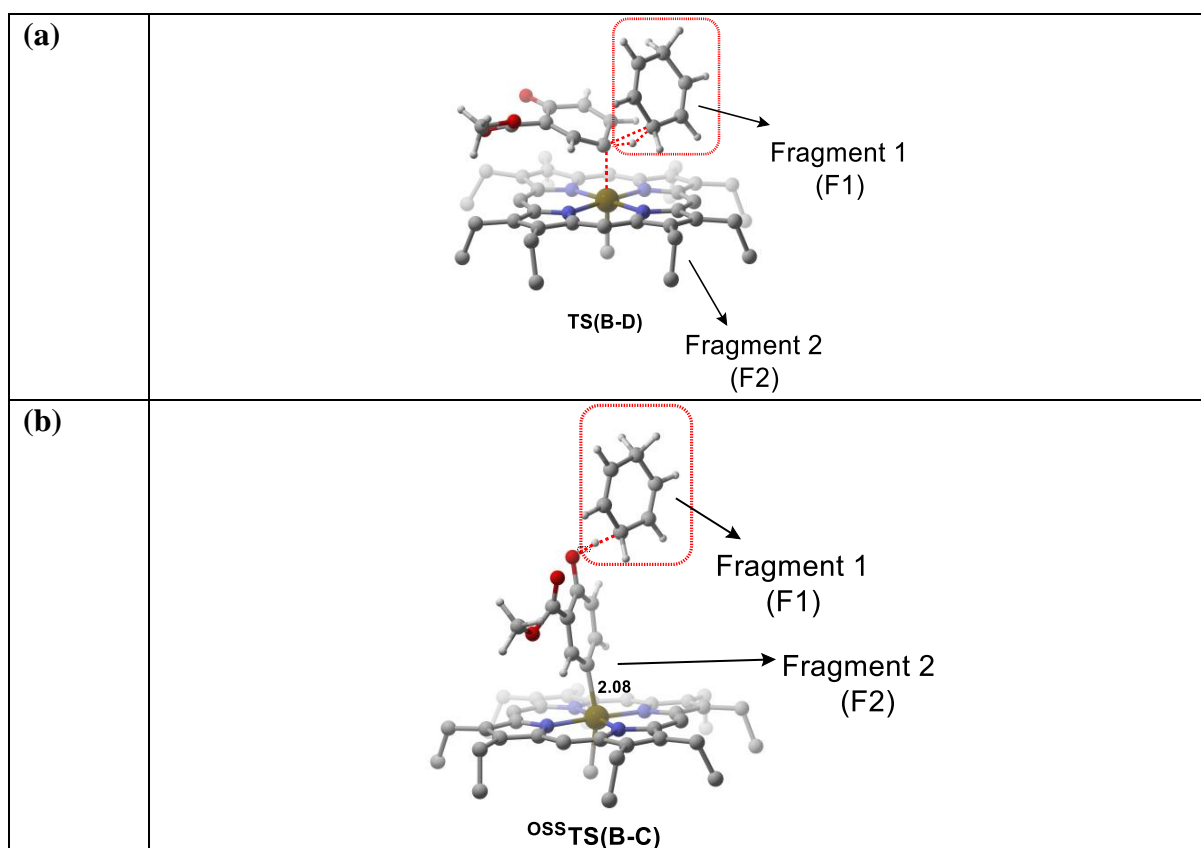

**Fig. S4.** Energy Decomposition Analysis of (a) **TS(B-D)** and (b) <sup>OSS</sup>**TS(B-C)**.



The following fragments from the distortion-interaction study were used for the EDA calculation. The interaction between the two fragments F1 and F2 was computed and decoupled using the ADF software at the B3LYP-D3BJ/TZP level of theory.<sup>11</sup>

The breakdown of the interaction energy is as follows:

**Table S20.** Energy Decomposition Analysis of **TS(B-D)** and <sup>OSS</sup>**TS(B-C)**. Energies are in kcal/mol

|                                   | <b>TS(B-D)</b> | <sup>OSS</sup> <b>TS(B-C)</b> |
|-----------------------------------|----------------|-------------------------------|
| <b>Total Pauli Repulsion</b>      | 82.22          | 130.18                        |
| <b>Total Orbital Interactions</b> | -54.48         | -90.81                        |
| <b>Electrostatic Interaction</b>  | -31.90         | -44.8                         |
| <b>Dispersion Energy</b>          | -15.06         | -5.2                          |
| <b>Total Interaction Energy</b>   | -19.22         | -10.63                        |

**Table S21.** Mulliken Spin Populations of select atoms of <sup>OSS</sup>**TS(B-C)**<sub>DHA-S1</sub> and <sup>OSS</sup>**TS(B-C)**<sub>DHA-S2</sub><sup>a</sup>

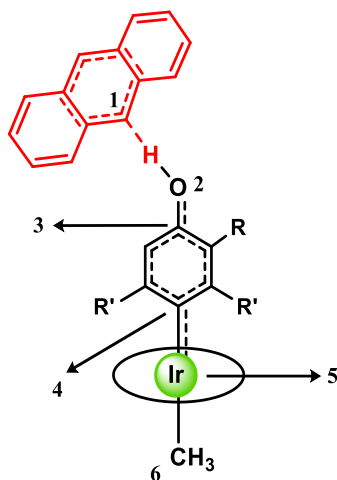

| <b>Atom Number</b> | <b>DHA-S1 spins</b> | <b>DHA-S2 spins</b> |
|--------------------|---------------------|---------------------|
| <b>1</b>           | 0.27                | 0.25                |
| <b>2</b>           | 0.20                | 0.19                |
| <b>3</b>           | -0.08               | -0.08               |
| <b>4</b>           | -0.07               | -0.08               |
| <b>5</b>           | -0.17               | -0.20               |
| <b>6</b>           | -0.28               | -0.17               |

<sup>a</sup>S1: R=CO<sub>2</sub>Me, R'=H, S2: R=H, R'=Me

**Table S22.** Mulliken charges of ion pair fragments DHA-S1 and DHA-S2<sup>a</sup>

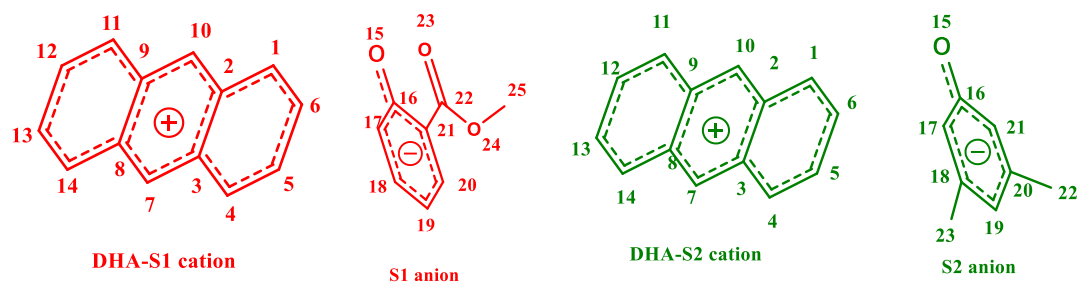

| Atom Number | DHA-S1<br>charges | DHA-S2<br>charges |
|-------------|-------------------|-------------------|
| 1           | -0.0782757        | -0.0112212        |
| 2           | 0.0462462         | -0.043596         |
| 3           | 0.203392728       | 0.3644424         |
| 4           | -0.004595514      | 0.3786788         |
| 5           | 0.012626614       | -0.1491076        |
| 6           | 0.088016544       | 0.0643896         |
| 7           | 0.074871412       | -0.1747476        |
| 8           | 0.15554030        | 0.3856752         |
| 9           | 0.03978359        | 0.3643848         |
| 10          | 0.239967112       | -0.2593116        |
| 11          | -0.05493488       | -0.0434844        |
| 12          | 0.114459884       | -0.0112104        |
| 13          | -0.002417954      | 0.0643536         |
| 14          | 0.030498776       | -0.1480644        |
| 15          | -0.748735         | -0.7488297        |
| 16          | 0.038207          | 0.54742132        |
| 17          | -0.1420692        | -0.38757334       |
| 18          | 0.4217759         | 0.31128326        |
| 19          | -0.1583296        | -0.38756078       |
| 20          | 0.0026702         | 0.54740876        |
| 21          | 0.7058922         | -0.1129615        |
| 22          | 0.065689          | -0.43488686       |
| 23          | -0.748735         | -0.11292696       |
| 24          | -0.6283394        | -                 |
| 25          | 0.3475589         | -                 |

<sup>a</sup>Condensed Mulliken charges on heavy atoms.

Net Charges:

DHA-S1 cation: 0.868

S1 anion: -0.871

DHA-S2 cation: 0.781

S2 anion: -0.779

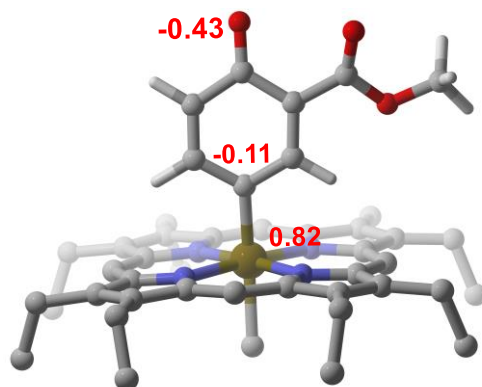

**Fig. S5.** Mulliken charge populations on the reactive carbene carbon, quinoid oxygen and Ir centres.

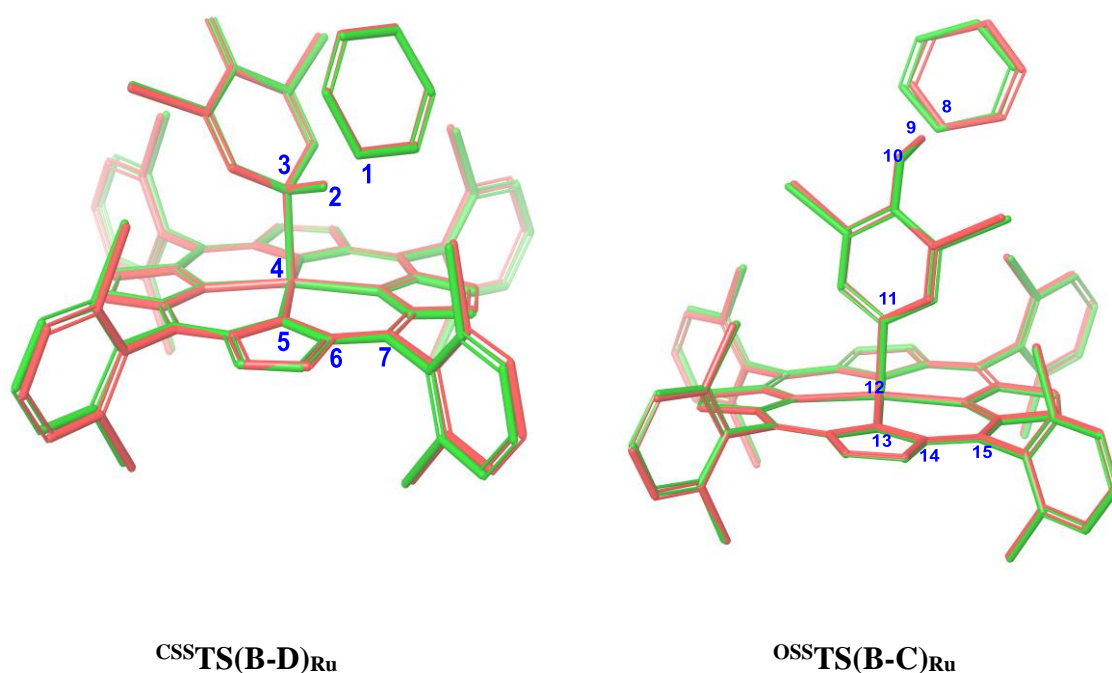

**Fig. S6.** Overlaid images of (a)  $\text{CSS}^{\text{TS}}(\text{B-D})_{\text{Ru}}$  and (b)  $\text{OSS}^{\text{TS}}(\text{B-C})_{\text{Ru}}$  optimised at the 6-31G(d,p) (green) and 6-31+G(d,p) (red) basis sets.

**Table S23.** Comparison of important geometric parameters for the 6-31G(d,p) and 6-31+G(d,p) basis sets optimised geometries (distances are in Å, angles are in degrees)

| Geometric Parameter | 6-31G(d,p) | 6-31+G(d,p) |
|---------------------|------------|-------------|
| 1-2                 | 1.43       | 1.43        |
| 2-3                 | 1.29       | 1.29        |
| 1-3                 | 2.66       | 2.66        |
| 3-4                 | 2.01       | 2.01        |
| 1-2-3               | 155.8      | 156.3       |

|             |       |       |
|-------------|-------|-------|
| 4-5-6-7     | -1.4  | -1.5  |
| 8-9         | 1.30  | 1.30  |
| 9-10        | 1.28  | 1.28  |
| 8-10        | 2.56  | 2.57  |
| 8-9-10      | 169.8 | 169.9 |
| 11-12       | 2.00  | 2.00  |
| 12-13-14-15 | -5.3° | -5.7° |

Previous works by Jiao *et al*<sup>12</sup> on dehydrogenative C-C couplings on 9,10 dihydroacridine using TEMPO as an aerobic oxidant and quite likely proceeding via a HAT to a TEMPO molecule prompted us to computationally study its analogous reaction with CHD.<sup>12</sup>

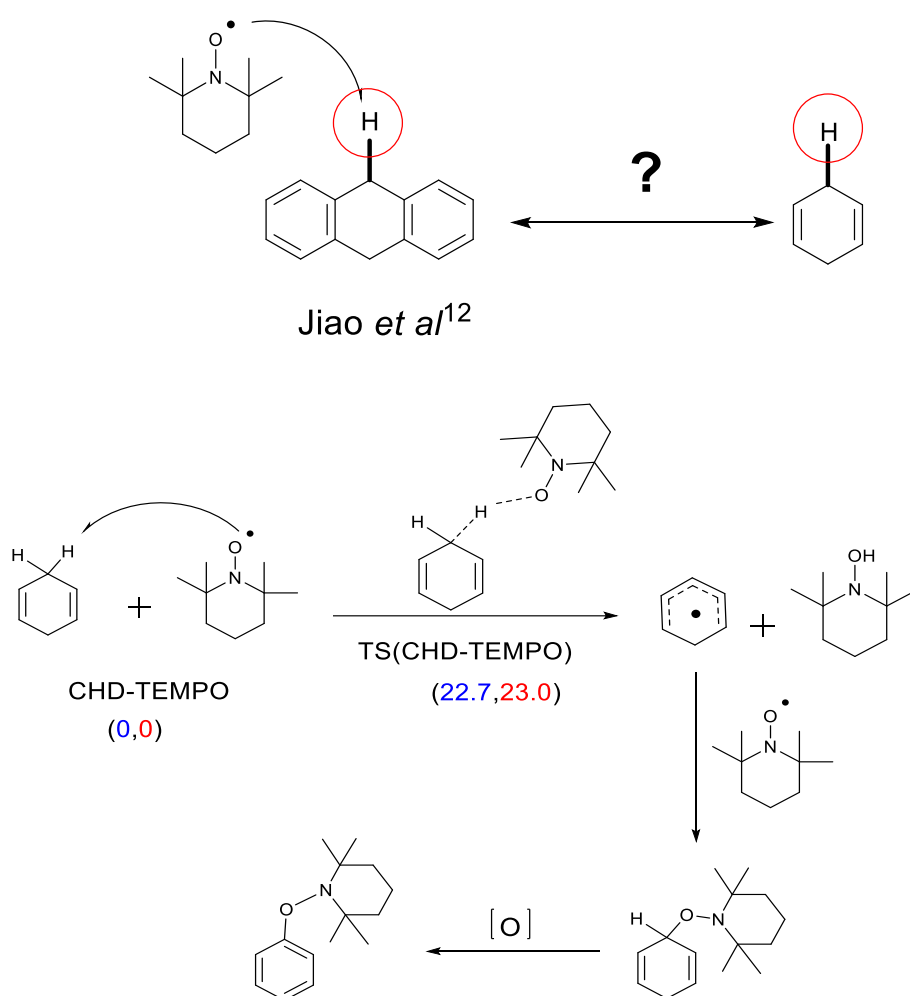

\*Values in blue and red denote the relative free energies after solvent phase single points at B3LYP-D3J/ Def2TZVPP and wB97XD/Def2TZVPP

**Scheme S1.** Formation of the TEMPO adduct with CHD.

The computation showed that the competitive HAT to TEMPO pathway had a barrier lower than the catalytic cycle by 2.6 kcal/mol, and the participation of the large excess of TEMPO

could very well be responsible for the generation of the CHD radical which gives the TEMPO adduct. The other plausible reason for the lowering of the arylation yield in the presence of TEMPO which cannot be ruled out is the degradation of the catalyst by the radical additive, a phenomenon which has been observed in several studies involving transition metal catalysts.<sup>13</sup>

## References

- (1) *Gaussian 16, Revision C.01*, M. J. Frisch, G. W. Trucks, H. B. Schlegel, G. E. Scuseria, M. A. Robb, J. R. Cheeseman, G. Scalmani, V. Barone, G. A. Petersson, H. Nakatsuji, X. Li, M. Caricato, A. V. Marenich, J. Bloino, B. G. Janesko, R. Gomperts, B. Mennucci, H. P. Hratchian, J. V. Ortiz, A. F. Izmaylov, J. L. Sonnenberg, D. Williams-Young, F. Ding, F. Lipparini, F. Egidi, J. Goings, B. Peng, A. Petrone, T. Henderson, D. Ranasinghe, V. G. Zakrzewski, J. Gao, N. Rega, G. Zheng, W. Liang, M. Hada, M. Ehara, K. Toyota, R. Fukuda, J. Hasegawa, M. Ishida, T. Nakajima, Y. Honda, O. Kitao, H. Nakai, T. Vreven, K. Throssell, J. A. Montgomery, Jr., J. E. Peralta, F. Ogliaro, M. J. Bearpark, J. J. Heyd, E. N. Brothers, K. N. Kudin, V. N. Staroverov, T. A. Keith, R. Kobayashi, J. Normand, K. Raghavachari, A. P. Rendell, J. C. Burant, S. S. Iyengar, J. Tomasi, M. Cossi, J. M. Millam, M. Klene, C. Adamo, R. Cammi, J. W. Ochterski, R. L. Martin, K. Morokuma, O. Farkas, J. B. Foresman, and D. J. Fox, Gaussian, Inc., Wallingford CT, 2016.
- (2) (a) C. Lee, W. Yang and R. G. Parr, *Phys. Rev. B: Condens. Matter Mater. Phys.*, 1988, **37**, 785-789. (b) A. D. Becke, *J. Chem. Phys.*, 1993, **98**, 5648-5652. (c) W. J. Hehre, R. Ditchfield and J. A. Pople, *J. Chem. Phys.*, 1972, **56**, 2257-2261. (d) P. C. Hariharan and J. A. Pople, *Theor. Chim. Acta.*, 1973, **28**, 213-222.
- (3) S. Grimme, S. Ehrlich and L. Goerigk, *J. Comput. Chem.*, 2011, **32**, 1456-1465.
- (4) P. J. Hay and W. R. Wadt, *J. Chem. Phys.*, 1985, **82**, 299-310.
- (5) R. Caballol, O. Castell, F. Illas, I. de P. R. Moreira and J. Malrieu, *J. Phys. Chem. A.*, 1997, **101**, 7860-7866.
- (6) (a) K. Fukui, *Acc. Chem. Res.*, 1981, **14**, 363-368. (b) H. P. Hratchian and H. B. Schlegel, *Theory and Applications of Computational Chemistry: The First 40 Years*, Eds. C. E. Dykstra, G. Frenking, K. S. Kim, G. Scuseria, Elsevier, Amsterdam, 2005, 195-249. (b) C. Gonzalez and H. B. Schlegel, *J. Chem. Phys.*, 1989, **90**, 2154-2161. (c) C. Gonzalez, H. B. Schlegel, *J. Phys. Chem.*, 1990, **94**, 5523-5527.
- (7) F. Weigend and R. Ahlrichs, *Phys. Chem. Chem. Phys.*, 2005, **7**, 3297-3305.

- (8) A. V. Marenich, C. J. Cramer and D. G. Truhlar, *J. Phys. Chem. B.*, 2009, **113**, 6378-6396.
- (9) F. M. Bickelhaupt and K. N. Houk, *Angew. Chem. Int. Ed.*, 2017, **56**, 10070-10086.
- (10) D. Roca-Lopez, V. Polo, T. Tejero and P. Merino, *J. Org. Chem.*, 2015, **80**, 4076-4083.
- (11) G. te Velde, F.M. Bickelhaupt, E. J. Baerends, C. Fonseca Guerra, S. J. A. van Gisbergen, J. G. Snijders and T. Ziegler, *Chemistry with ADF, J. Comput. Chem.* 2001, **22**, 931.
- (12) (a) B. Zhang, Y. Cui and N. Jiao, *Chem. Commun.*, 2012, **48**, 4498-4500.
- (13) (a) A. C. Albeniz, P. Espinet, R. Lopez-Fernandez and A. Sen, *J. Am. Chem. Soc.*, 2002, **124**, 11278-11279. (b) A. Hernán-Gómez, M. Rodríguez, T. Parella and M. Costas, *Angew. Chem., Int. Ed.*, 2019, **58**, 13904-13911.

#### Coordinates of optimised stationary points

-----  
**A**  
 -----

Number of imaginary frequencies : 0 Electronic energy : HF=-2406.0492203  
 Zero-point correction= 0.902006 (Hartree/Particle)  
 Thermal correction to Energy= 0.959188  
 Thermal correction to Enthalpy= 0.960132  
 Thermal correction to Gibbs Free Energy= 0.808035  
 Sum of electronic and zero-point Energies= -2405.147215  
 Sum of electronic and thermal Energies= -2405.090032  
 Sum of electronic and thermal Enthalpies= -2405.089088  
 Sum of electronic and thermal Free Energies= -2405.241185

-----  
 Cartesian Coordinates  
 -----

|    |           |           |           |
|----|-----------|-----------|-----------|
| 6  | -3.197301 | 3.294438  | 0.305203  |
| 6  | -2.845085 | 1.892201  | 0.172577  |
| 7  | -1.489376 | 1.774117  | -0.040635 |
| 6  | -0.971860 | 3.049434  | -0.061667 |
| 6  | -2.036259 | 4.011292  | 0.165360  |
| 6  | -3.731479 | 0.827617  | 0.272833  |
| 6  | -3.424358 | -0.524258 | 0.195375  |
| 7  | -2.163897 | -1.038747 | -0.014801 |
| 6  | -2.283558 | -2.409471 | -0.027128 |
| 6  | -3.669468 | -2.779775 | 0.202142  |
| 6  | -4.376624 | -1.611992 | 0.337271  |
| 6  | -1.234260 | -3.299788 | -0.218439 |
| 6  | 0.097077  | -2.980734 | -0.441890 |
| 7  | 0.596049  | -1.702215 | -0.545385 |
| 6  | 1.953874  | -1.817106 | -0.738408 |
| 6  | 2.337369  | -3.218859 | -0.715078 |
| 6  | 1.185770  | -3.939970 | -0.544749 |
| 77 | -0.452434 | 0.034571  | -0.344255 |
| 7  | 1.271282  | 1.107817  | -0.593400 |

|   |           |           |           |
|---|-----------|-----------|-----------|
| 6 | 2.518842  | 0.594881  | -0.854039 |
| 6 | 3.477213  | 1.679420  | -0.988641 |
| 6 | 2.785108  | 2.846071  | -0.784764 |
| 6 | 1.400078  | 2.477513  | -0.540460 |
| 6 | 1.019748  | -5.428187 | -0.486107 |
| 6 | 0.539762  | -6.026640 | -1.820553 |
| 6 | 3.749279  | -3.706670 | -0.822335 |
| 6 | 4.282147  | -3.709504 | -2.265789 |
| 6 | 2.829787  | -0.756710 | -0.904278 |
| 6 | -5.853479 | -1.434446 | 0.525335  |
| 6 | -6.584819 | -1.106444 | -0.789087 |
| 6 | -4.186554 | -4.187163 | 0.207070  |
| 6 | -4.378919 | -4.755497 | -1.210686 |
| 6 | 0.363467  | 3.364637  | -0.282255 |
| 6 | 3.291478  | 4.255259  | -0.859387 |
| 6 | 2.989764  | 4.924893  | -2.212073 |
| 6 | 4.924513  | 1.489724  | -1.330402 |
| 6 | 5.145863  | 1.128283  | -2.810037 |
| 6 | -1.856438 | 5.499798  | 0.161580  |
| 6 | -1.790546 | 6.087427  | -1.259863 |
| 6 | -4.591770 | 3.809181  | 0.499385  |
| 6 | -5.405983 | 3.832315  | -0.806953 |
| 6 | 0.034693  | -0.202606 | 2.640136  |
| 6 | -0.121041 | -1.633233 | 2.721384  |
| 6 | 0.980991  | -2.407313 | 2.615684  |
| 6 | 2.340021  | -1.869513 | 2.426050  |
| 6 | 2.436860  | -0.388680 | 2.363601  |
| 6 | 1.325751  | 0.394432  | 2.478857  |
| 6 | 3.751904  | 0.265210  | 2.131852  |
| 8 | 4.726420  | -0.239840 | 1.616486  |
| 8 | 3.310068  | -2.622805 | 2.344606  |
| 6 | -0.845123 | 0.152614  | -2.359041 |
| 8 | 3.734831  | 1.553282  | 2.573496  |
| 6 | 4.926648  | 2.305601  | 2.320703  |
| 7 | -1.012066 | 0.591787  | 2.848319  |
| 7 | -1.899009 | 1.275189  | 3.022180  |
| 1 | 3.874709  | -1.008020 | -1.027901 |
| 1 | -1.478779 | -4.354749 | -0.172425 |
| 1 | -4.770503 | 1.078589  | 0.451838  |
| 1 | 0.621720  | 4.417172  | -0.259750 |
| 1 | 2.851655  | 4.852853  | -0.051019 |
| 1 | 4.373251  | 4.264200  | -0.687107 |
| 1 | 1.913058  | 4.943372  | -2.406826 |
| 1 | 3.462322  | 4.370108  | -3.028277 |
| 1 | -0.942525 | 5.766516  | 0.706818  |
| 1 | -2.681940 | 5.968751  | 0.707941  |
| 1 | -4.552340 | 4.820641  | 0.917898  |
| 1 | -5.114810 | 3.194285  | 1.242355  |
| 1 | 5.475758  | 2.409331  | -1.103357 |
| 1 | 5.349340  | 0.711740  | -0.686015 |
| 1 | -6.043586 | -0.636833 | 1.254345  |
| 1 | -6.279130 | -2.346751 | 0.957049  |
| 1 | 3.360778  | 5.954717  | -2.235800 |
| 1 | -5.140935 | -4.223873 | 0.743482  |
| 1 | -3.499532 | -4.834792 | 0.766029  |
| 1 | -4.746282 | -5.786244 | -1.176280 |
| 1 | -3.436409 | -4.745257 | -1.766338 |
| 1 | -5.098910 | -4.152868 | -1.772737 |
| 1 | -6.449825 | -1.912853 | -1.516305 |
| 1 | -6.189595 | -0.189879 | -1.237494 |

|   |           |           |           |
|---|-----------|-----------|-----------|
| 1 | -7.658212 | -0.971461 | -0.621008 |
| 1 | -5.475831 | 2.830649  | -1.241955 |
| 1 | -4.926950 | 4.479428  | -1.548066 |
| 1 | -6.421545 | 4.202533  | -0.633025 |
| 1 | -1.647717 | 7.172576  | -1.232804 |
| 1 | -2.714456 | 5.876245  | -1.806808 |
| 1 | -0.964931 | 5.646595  | -1.826850 |
| 1 | 6.210235  | 0.988371  | -3.023973 |
| 1 | 4.764801  | 1.919105  | -3.463972 |
| 1 | 4.621272  | 0.204391  | -3.070992 |
| 1 | 3.810559  | -4.719917 | -0.412453 |
| 1 | 4.383730  | -3.086251 | -0.179656 |
| 1 | 5.318454  | -4.060533 | -2.300139 |
| 1 | 4.249379  | -2.706804 | -2.703523 |
| 1 | 3.677830  | -4.364073 | -2.902289 |
| 1 | 0.309691  | -5.693737 | 0.307408  |
| 1 | 1.973044  | -5.887219 | -0.204874 |
| 1 | 0.418752  | -7.112327 | -1.746697 |
| 1 | 1.259762  | -5.814500 | -2.616808 |
| 1 | -0.419867 | -5.594658 | -2.121647 |
| 1 | 1.402595  | 1.472759  | 2.420700  |
| 1 | -1.116502 | -2.049517 | 2.825843  |
| 1 | 0.907893  | -3.488177 | 2.641420  |
| 1 | 5.809473  | 1.748887  | 2.641366  |
| 1 | 4.820878  | 3.227531  | 2.892982  |
| 1 | 5.011710  | 2.531146  | 1.255735  |
| 1 | -0.240078 | -0.595281 | -2.876370 |
| 1 | -0.585507 | 1.155952  | -2.704704 |
| 1 | -1.908465 | -0.040615 | -2.519731 |

---

**TS(A-B)**

---

Number of imaginary frequencies : 1 Electronic energy : HF=-2406.0163651  
Zero-point correction= 0.899021 (Hartree/Particle)  
Thermal correction to Energy= 0.955875  
Thermal correction to Enthalpy= 0.956819  
Thermal correction to Gibbs Free Energy= 0.807451  
Sum of electronic and zero-point Energies= -2405.117344  
Sum of electronic and thermal Energies= -2405.060490  
Sum of electronic and thermal Enthalpies= -2405.059546  
Sum of electronic and thermal Free Energies= -2405.208914

.....  
Cartesian Coordinates  
.....

|   |           |           |           |
|---|-----------|-----------|-----------|
| 6 | -3.819480 | 2.658616  | 0.339885  |
| 6 | -3.179972 | 1.358860  | 0.284618  |
| 7 | -1.820517 | 1.522559  | 0.101712  |
| 6 | -1.580954 | 2.881513  | 0.035823  |
| 6 | -2.831439 | 3.599257  | 0.189248  |
| 6 | -3.829078 | 0.137426  | 0.401945  |
| 6 | -3.257851 | -1.125689 | 0.292934  |
| 7 | -1.932123 | -1.370370 | 0.052113  |
| 6 | -1.776691 | -2.732223 | -0.052218 |
| 6 | -3.060576 | -3.382463 | 0.162073  |
| 6 | -3.978694 | -2.387174 | 0.376903  |
| 6 | -0.581260 | -3.385917 | -0.316867 |
| 6 | 0.661717  | -2.803361 | -0.540464 |
| 7 | 0.908395  | -1.453858 | -0.548914 |
| 6 | 2.245265  | -1.286047 | -0.811942 |



|    |           |           |           |
|----|-----------|-----------|-----------|
| 6  | 2.886029  | -2.584070 | -0.931645 |
| 6  | 1.901097  | -3.525119 | -0.773605 |
| 77 | -0.455122 | 0.041628  | -0.171752 |
| 7  | 1.015212  | 1.452445  | -0.473548 |
| 6  | 2.330118  | 1.198210  | -0.777167 |
| 6  | 3.055943  | 2.453732  | -0.874542 |
| 6  | 2.149621  | 3.455590  | -0.636214 |
| 6  | 0.866424  | 2.811899  | -0.397508 |
| 6  | 2.023328  | -5.017093 | -0.828717 |
| 6  | 1.609089  | -5.598488 | -2.192231 |
| 6  | 4.355277  | -2.785867 | -1.140596 |
| 6  | 4.796489  | -2.572933 | -2.599293 |
| 6  | 2.890545  | -0.061996 | -0.929280 |
| 6  | -5.459014 | -2.512268 | 0.578455  |
| 6  | -6.257502 | -2.282495 | -0.717723 |
| 6  | -3.292820 | -4.861008 | 0.074805  |
| 6  | -3.390831 | -5.363881 | -1.377011 |
| 6  | -0.336860 | 3.466875  | -0.156370 |
| 6  | 2.366929  | 4.938180  | -0.680920 |
| 6  | 1.940537  | 5.562532  | -2.022045 |
| 6  | 4.505425  | 2.566334  | -1.240593 |
| 6  | 4.748172  | 2.441086  | -2.755588 |
| 6  | -2.971522 | 5.090149  | 0.119358  |
| 6  | -2.972697 | 5.620443  | -1.325874 |
| 6  | -5.296416 | 2.875905  | 0.476143  |
| 6  | -6.052065 | 2.678465  | -0.850467 |
| 6  | 0.124130  | -0.165436 | 1.969392  |
| 6  | -0.118515 | -1.497495 | 2.496259  |
| 6  | 0.925219  | -2.348812 | 2.583499  |
| 6  | 2.320742  | -1.917525 | 2.356545  |
| 6  | 2.520992  | -0.448075 | 2.242266  |
| 6  | 1.449084  | 0.383555  | 2.192559  |
| 6  | 3.892203  | 0.118813  | 2.112533  |
| 8  | 4.835316  | -0.398749 | 1.552692  |
| 8  | 3.239075  | -2.732052 | 2.322984  |
| 6  | -0.808499 | 0.038468  | -2.246812 |
| 8  | 3.957845  | 1.347841  | 2.684791  |
| 6  | 5.213081  | 2.024510  | 2.539701  |
| 7  | -0.958450 | 0.939017  | 2.922351  |
| 7  | -1.748834 | 1.716648  | 2.766909  |
| 1  | 3.954757  | -0.099903 | -1.120344 |
| 1  | -0.617949 | -4.468626 | -0.346841 |
| 1  | -4.897873 | 0.173183  | 0.577130  |
| 1  | -0.305515 | 4.550123  | -0.143404 |
| 1  | 1.815596  | 5.420706  | 0.135692  |
| 1  | 3.425495  | 5.156240  | -0.501924 |
| 1  | 0.882029  | 5.371353  | -2.223243 |
| 1  | 2.514580  | 5.130858  | -2.847428 |
| 1  | -2.158137 | 5.566614  | 0.680470  |
| 1  | -3.899218 | 5.392970  | 0.616547  |
| 1  | -5.483023 | 3.887711  | 0.851517  |
| 1  | -5.704222 | 2.192935  | 1.231623  |
| 1  | 4.897746  | 3.527590  | -0.889856 |
| 1  | 5.078634  | 1.789881  | -0.719676 |
| 1  | -5.792834 | -1.798421 | 1.341667  |
| 1  | -5.690595 | -3.507502 | 0.973132  |
| 1  | 2.099797  | 6.645705  | -2.021893 |
| 1  | -4.214123 | -5.117237 | 0.609005  |
| 1  | -2.485036 | -5.395988 | 0.589505  |
| 1  | -3.549053 | -6.446635 | -1.409195 |

|   |           |           |           |
|---|-----------|-----------|-----------|
| 1 | -2.476839 | -5.133798 | -1.932689 |
| 1 | -4.222593 | -4.879502 | -1.897440 |
| 1 | -5.976884 | -3.017354 | -1.478240 |
| 1 | -6.055611 | -1.289403 | -1.130556 |
| 1 | -7.334158 | -2.367531 | -0.538372 |
| 1 | -5.894887 | 1.669199  | -1.242909 |
| 1 | -5.694669 | 3.384266  | -1.606449 |
| 1 | -7.127897 | 2.832244  | -0.718422 |
| 1 | -3.064099 | 6.711193  | -1.345898 |
| 1 | -3.807409 | 5.195585  | -1.891648 |
| 1 | -2.049659 | 5.343271  | -1.844015 |
| 1 | 5.814845  | 2.513259  | -2.990668 |
| 1 | 4.221666  | 3.231886  | -3.298550 |
| 1 | 4.378845  | 1.481603  | -3.129729 |
| 1 | 4.623853  | -3.799428 | -0.826307 |
| 1 | 4.899486  | -2.110287 | -0.471706 |
| 1 | 5.876098  | -2.718697 | -2.707255 |
| 1 | 4.554439  | -1.562777 | -2.944795 |
| 1 | 4.287987  | -3.276439 | -3.266527 |
| 1 | 1.412995  | -5.468798 | -0.037125 |
| 1 | 3.057272  | -5.301736 | -0.609805 |
| 1 | 1.700570  | -6.689496 | -2.201167 |
| 1 | 2.239880  | -5.194398 | -2.989954 |
| 1 | 0.572519  | -5.339740 | -2.430955 |
| 1 | 1.588013  | 1.456132  | 2.133963  |
| 1 | -1.142275 | -1.832784 | 2.622541  |
| 1 | 0.790063  | -3.407365 | 2.778669  |
| 1 | 6.031857  | 1.399099  | 2.902069  |
| 1 | 5.127643  | 2.932849  | 3.135919  |
| 1 | 5.395482  | 2.275177  | 1.492088  |
| 1 | 0.132601  | 0.217762  | -2.773121 |
| 1 | -1.521811 | 0.828900  | -2.496805 |
| 1 | -1.216015 | -0.931066 | -2.545359 |

---

**cssB**

---

Number of imaginary frequencies : 0 Electronic energy : HF=-2529.98407  
Zero-point correction= 1.015718 (Hartree/Particle)  
Thermal correction to Energy= 1.077568  
Thermal correction to Enthalpy= 1.078512  
Thermal correction to Gibbs Free Energy= 0.915862  
Sum of electronic and zero-point Energies= -2528.968352  
Sum of electronic and thermal Energies= -2528.906502  
Sum of electronic and thermal Enthalpies= -2528.905558  
Sum of electronic and thermal Free Energies= -2529.068208

.....  
Cartesian Coordinates

|   |           |          |           |
|---|-----------|----------|-----------|
| 6 | -4.077968 | 2.458310 | 0.667180  |
| 6 | -2.683914 | 2.309477 | 0.285046  |
| 7 | -2.406444 | 0.988426 | 0.075072  |
| 6 | -3.557504 | 0.278498 | 0.303359  |
| 6 | -4.619552 | 1.197209 | 0.680323  |
| 6 | -1.754183 | 3.341103 | 0.179425  |
| 6 | -0.419208 | 3.229820 | -0.176944 |
| 7 | 0.231854  | 2.051760 | -0.491242 |
| 6 | 1.535899  | 2.374494 | -0.789677 |
| 6 | 1.723608  | 3.806460 | -0.654430 |
| 6 | 0.515036  | 4.334749 | -0.274412 |

|    |           |           |           |
|----|-----------|-----------|-----------|
| 6  | 2.517788  | 1.469114  | -1.165174 |
| 6  | 2.359203  | 0.103022  | -1.339561 |
| 7  | 1.192039  | -0.587907 | -1.128223 |
| 6  | 1.439812  | -1.910111 | -1.429640 |
| 6  | 2.827751  | -2.060518 | -1.832910 |
| 6  | 3.395492  | -0.814756 | -1.781082 |
| 77 | -0.571763 | 0.192031  | -0.460280 |
| 7  | -1.434238 | -1.701076 | -0.558316 |
| 6  | -0.815065 | -2.852204 | -0.952198 |
| 6  | -1.751386 | -3.960175 | -0.863602 |
| 6  | -2.938616 | -3.438764 | -0.414151 |
| 6  | -2.729239 | -2.011517 | -0.231326 |
| 6  | 4.786055  | -0.406601 | -2.157088 |
| 6  | 4.868249  | 0.193187  | -3.572280 |
| 6  | 3.453557  | -3.351674 | -2.266099 |
| 6  | 3.110107  | -3.726156 | -3.719116 |
| 6  | 0.517344  | -2.942852 | -1.349297 |
| 6  | 0.158407  | 5.774654  | -0.058344 |
| 6  | -0.534059 | 6.405704  | -1.279919 |
| 6  | 3.004567  | 4.524786  | -0.949239 |
| 6  | 3.241787  | 4.728071  | -2.456461 |
| 6  | -3.695255 | -1.099821 | 0.176781  |
| 6  | -4.245354 | -4.143448 | -0.207148 |
| 6  | -5.206242 | -3.975528 | -1.398296 |
| 6  | -1.442109 | -5.371553 | -1.262562 |
| 6  | -1.483566 | -5.582951 | -2.786862 |
| 6  | -6.039043 | 0.797499  | 0.949352  |
| 6  | -6.847625 | 0.572556  | -0.341333 |
| 6  | -4.758465 | 3.770208  | 0.917918  |
| 6  | -5.133673 | 4.503881  | -0.382424 |
| 6  | -0.364602 | -0.275559 | 1.494871  |
| 6  | 0.285195  | -1.491167 | 1.857211  |
| 6  | 0.764541  | -1.709017 | 3.123822  |
| 6  | 0.454957  | -0.751175 | 4.209434  |
| 6  | -0.452649 | 0.342595  | 3.832036  |
| 6  | -0.893525 | 0.529613  | 2.558118  |
| 8  | 0.923453  | -0.825826 | 5.348464  |
| 6  | 1.598559  | -2.903696 | 3.398364  |
| 8  | 1.708295  | -3.483027 | 4.455574  |
| 6  | -1.399535 | 0.295630  | -2.453112 |
| 8  | 2.247594  | -3.317712 | 2.264840  |
| 6  | 3.033959  | -4.502434 | 2.425690  |
| 6  | 3.496777  | 2.312280  | 2.091271  |
| 6  | 2.890359  | 0.942659  | 2.197901  |
| 6  | 3.807438  | -0.145563 | 1.715784  |
| 6  | 5.063762  | 0.074261  | 1.321954  |
| 6  | 5.704856  | 1.437379  | 1.303012  |
| 6  | 4.752940  | 2.535729  | 1.696850  |
| 1  | -4.673069 | -1.506989 | 0.405461  |
| 1  | -2.112419 | 4.339467  | 0.401168  |
| 1  | 3.508210  | 1.870504  | -1.335646 |
| 1  | 0.876094  | -3.930904 | -1.611572 |
| 1  | -0.841669 | -0.394040 | -3.090557 |
| 1  | -2.457565 | 0.034475  | -2.445477 |
| 1  | -1.269240 | 1.329301  | -2.786522 |
| 1  | -0.453271 | -5.656551 | -0.882404 |
| 1  | -2.156325 | -6.049440 | -0.783495 |
| 1  | -0.766969 | -4.928655 | -3.292901 |
| 1  | -2.476966 | -5.349466 | -3.181768 |
| 1  | 3.135099  | -4.159950 | -1.595842 |

|   |           |           |           |
|---|-----------|-----------|-----------|
| 1 | 4.540970  | -3.280661 | -2.158328 |
| 1 | 5.449883  | -1.275247 | -2.092082 |
| 1 | 5.163852  | 0.317121  | -1.427323 |
| 1 | -4.060860 | -5.209721 | -0.038918 |
| 1 | -4.727405 | -3.772591 | 0.705425  |
| 1 | 3.839252  | 3.966032  | -0.512421 |
| 1 | 2.997134  | 5.499484  | -0.449766 |
| 1 | -1.245134 | -6.619021 | -3.047481 |
| 1 | 1.065349  | 6.341575  | 0.176173  |
| 1 | -0.492723 | 5.869403  | 0.819220  |
| 1 | -0.789828 | 7.452919  | -1.090044 |
| 1 | -1.453835 | 5.868102  | -1.530192 |
| 1 | 0.119346  | 6.365471  | -2.156660 |
| 1 | 2.437726  | 5.323288  | -2.900137 |
| 1 | 3.269023  | 3.768723  | -2.982249 |
| 1 | 4.189993  | 5.244062  | -2.637582 |
| 1 | 4.224479  | 1.073621  | -3.662153 |
| 1 | 4.538647  | -0.532830 | -4.321829 |
| 1 | 5.893240  | 0.492944  | -3.812656 |
| 1 | 3.573436  | -4.676894 | -4.001298 |
| 1 | 3.463450  | -2.953984 | -4.409169 |
| 1 | 2.028218  | -3.818484 | -3.855439 |
| 1 | -6.153868 | -4.492019 | -1.215521 |
| 1 | -4.763388 | -4.383686 | -2.311873 |
| 1 | -5.421618 | -2.918323 | -1.581518 |
| 1 | -6.527012 | 1.571233  | 1.551441  |
| 1 | -6.059965 | -0.115721 | 1.556319  |
| 1 | -7.875610 | 0.272525  | -0.114686 |
| 1 | -6.390797 | -0.207317 | -0.958327 |
| 1 | -6.881164 | 1.487797  | -0.940119 |
| 1 | -4.111349 | 4.415373  | 1.525071  |
| 1 | -5.662251 | 3.603439  | 1.513361  |
| 1 | -5.620212 | 5.460821  | -0.168542 |
| 1 | -5.817843 | 3.897494  | -0.983673 |
| 1 | -4.245870 | 4.699348  | -0.991762 |
| 1 | 0.519350  | -2.216853 | 1.092325  |
| 1 | -1.532083 | 1.372456  | 2.325543  |
| 1 | -0.704808 | 1.035557  | 4.629190  |
| 1 | 3.491188  | -4.686362 | 1.452792  |
| 1 | 2.407420  | -5.348216 | 2.722073  |
| 1 | 3.802117  | -4.355034 | 3.188967  |
| 1 | 2.600162  | 0.745930  | 3.241473  |
| 1 | 2.858744  | 3.152281  | 2.358013  |
| 1 | 3.402997  | -1.153879 | 1.700940  |
| 1 | 5.134644  | 3.554465  | 1.657589  |
| 1 | 5.678625  | -0.760717 | 0.991429  |
| 1 | 6.119250  | 1.645557  | 0.301913  |
| 1 | 1.946208  | 0.907006  | 1.639399  |
| 1 | 6.585532  | 1.449240  | 1.966039  |

---

**OSST(B-C)**

---

Number of imaginary frequencies : 1 Electronic energy : HF=-2529.9477725  
Zero-point correction= 1.008364 (Hartree/Particle)  
Thermal correction to Energy= 1.069855  
Thermal correction to Enthalpy= 1.070799  
Thermal correction to Gibbs Free Energy= 0.906165  
Sum of electronic and zero-point Energies= -2528.939409  
Sum of electronic and thermal Energies= -2528.877917

Sum of electronic and thermal Enthalpies= -2528.876973  
Sum of electronic and thermal Free Energies= -2529.041607

.....  
Cartesian Coordinates

.....  
6 0.794121 -0.035490 4.197367  
6 0.128863 -0.649280 3.061834  
7 -0.208628 0.319073 2.146045  
6 0.219298 1.527868 2.657214  
6 0.847122 1.311926 3.948151  
6 -0.141756 -2.003734 2.925214  
6 -0.823425 -2.612923 1.880523  
7 -1.309829 -1.963058 0.771627  
6 -1.937517 -2.910686 -0.011667  
6 -1.844479 -4.208720 0.631967  
6 -1.151345 -4.025473 1.800902  
6 -2.547685 -2.667246 -1.233272  
6 -2.635090 -1.446685 -1.897830  
7 -2.121426 -0.269408 -1.432951  
6 -2.377005 0.693706 -2.372928  
6 -3.087166 0.097654 -3.494014  
6 -3.251760 -1.231210 -3.196818  
77 -1.122629 0.017307 0.358023  
7 -1.006822 2.046272 -0.035604  
6 -1.417114 2.665574 -1.187306  
6 -1.124130 4.088235 -1.101065  
6 -0.537850 4.298061 0.120504  
6 -0.470245 3.003234 0.778096  
6 -3.971662 -2.283030 -3.985691  
6 -5.393807 -2.551807 -3.461142  
6 -3.586706 0.853433 -4.688267  
6 -4.898300 1.609372 -4.408099  
6 -2.033306 2.036444 -2.262425  
6 -0.833064 -5.034867 2.862297  
6 -1.820333 -4.988428 4.042778  
6 -2.465858 -5.467724 0.106445  
6 -3.977890 -5.546416 0.385101  
6 0.092680 2.756865 2.027285  
6 -0.081513 5.588833 0.730156  
6 -1.084951 6.156683 1.750008  
6 -1.477753 5.098765 -2.150051  
6 -2.956376 5.523611 -2.092395  
6 1.381276 2.400834 4.829107  
6 0.273431 3.142048 5.599298  
6 1.251356 -0.774989 5.418313  
6 0.101726 -1.073747 6.397834  
6 0.607612 -0.127734 -0.780694  
6 1.650596 0.794895 -0.604980  
6 2.876498 0.668412 -1.258945  
6 3.069627 -0.390118 -2.206877  
6 1.987686 -1.288626 -2.409139  
6 0.781717 -1.139916 -1.746328  
8 4.161298 -0.533885 -2.913760  
6 3.965375 1.627297 -0.954884  
8 5.160389 1.439986 -1.089217  
6 -3.135401 0.547932 1.049768  
8 3.476134 2.799049 -0.463077  
6 4.469366 3.753974 -0.080926  
6 6.000515 -1.523998 -1.421649  
6 5.956816 -2.969396 -1.664979

|   |           |           |           |
|---|-----------|-----------|-----------|
| 6 | 6.943306  | -3.619595 | -2.309401 |
| 6 | 8.189360  | -2.929089 | -2.785359 |
| 6 | 8.267031  | -1.485306 | -2.377850 |
| 6 | 7.265789  | -0.855846 | -1.732999 |
| 1 | -2.291504 | 2.668442  | -3.104181 |
| 1 | -2.989820 | -3.522197 | -1.731410 |
| 1 | 0.193777  | -2.649421 | 3.728116  |
| 1 | 0.495607  | 3.613718  | 2.554239  |
| 1 | -3.004293 | 1.016588  | 2.027557  |
| 1 | -3.601825 | 1.234645  | 0.345147  |
| 1 | -3.694818 | -0.387425 | 1.116730  |
| 1 | 0.890693  | 5.443809  | 1.218150  |
| 1 | 0.085327  | 6.326241  | -0.062177 |
| 1 | -1.260166 | 5.446772  | 2.564272  |
| 1 | -2.049799 | 6.352673  | 1.272408  |
| 1 | 1.949633  | 3.120524  | 4.226967  |
| 1 | 2.094291  | 1.974535  | 5.542693  |
| 1 | 2.021001  | -0.189459 | 5.932334  |
| 1 | 1.732673  | -1.715775 | 5.124422  |
| 1 | -0.842881 | 5.983361  | -2.031824 |
| 1 | -1.252685 | 4.696297  | -3.145149 |
| 1 | 0.186277  | -4.874191 | 3.234182  |
| 1 | -0.840399 | -6.038770 | 2.424578  |
| 1 | -0.720009 | 7.093092  | 2.184236  |
| 1 | -1.969805 | -6.334009 | 0.556834  |
| 1 | -2.290754 | -5.546760 | -0.973619 |
| 1 | -4.405496 | -6.470347 | -0.017283 |
| 1 | -4.503744 | -4.699893 | -0.066927 |
| 1 | -4.173401 | -5.517834 | 1.461368  |
| 1 | -2.839085 | -5.196648 | 3.701947  |
| 1 | -1.825727 | -3.998628 | 4.509383  |
| 1 | -1.556202 | -5.726631 | 4.806790  |
| 1 | -0.678513 | -1.670043 | 5.914990  |
| 1 | -0.361473 | -0.144639 | 6.743680  |
| 1 | 0.462304  | -1.624158 | 7.272729  |
| 1 | 0.692255  | 3.936373  | 6.225450  |
| 1 | -0.276302 | 2.450206  | 6.244707  |
| 1 | -0.447938 | 3.592573  | 4.910763  |
| 1 | -3.188047 | 6.253451  | -2.874803 |
| 1 | -3.190826 | 5.973483  | -1.122745 |
| 1 | -3.616709 | 4.660604  | -2.222268 |
| 1 | -3.741059 | 0.158388  | -5.520534 |
| 1 | -2.822069 | 1.563759  | -5.025541 |
| 1 | -5.233086 | 2.159976  | -5.293106 |
| 1 | -4.770798 | 2.322821  | -3.588143 |
| 1 | -5.690430 | 0.912733  | -4.117043 |
| 1 | -3.397038 | -3.217598 | -3.971906 |
| 1 | -4.025379 | -1.977423 | -5.036015 |
| 1 | -5.891545 | -3.329136 | -4.049848 |
| 1 | -6.000623 | -1.642508 | -3.509801 |
| 1 | -5.370666 | -2.875373 | -2.415919 |
| 1 | 1.534789  | 1.615644  | 0.088106  |
| 1 | -0.019550 | -1.843069 | -1.944738 |
| 1 | 2.145222  | -2.092167 | -3.122426 |
| 1 | 3.918760  | 4.616404  | 0.296460  |
| 1 | 5.084734  | 4.038632  | -0.938407 |
| 1 | 5.123637  | 3.347115  | 0.695325  |
| 1 | 5.152789  | -0.995026 | -2.209132 |
| 1 | 5.072674  | -3.512011 | -1.338628 |
| 1 | 7.344876  | 0.192669  | -1.466118 |

|   |          |           |           |
|---|----------|-----------|-----------|
| 1 | 6.862408 | -4.687178 | -2.500341 |
| 1 | 9.181106 | -0.949625 | -2.623143 |
| 1 | 9.080884 | -3.472063 | -2.427543 |
| 1 | 5.510471 | -1.182315 | -0.504739 |
| 1 | 8.259012 | -3.008621 | -3.885398 |

-----  
**oSSC**  
 -----

Number of imaginary frequencies : 0 Electronic energy : HF=-2530.008865  
 Zero-point correction= 1.014508 (Hartree/Particle)  
 Thermal correction to Energy= 1.076310  
 Thermal correction to Enthalpy= 1.077254  
 Thermal correction to Gibbs Free Energy= 0.914550  
 Sum of electronic and zero-point Energies= -2528.994357  
 Sum of electronic and thermal Energies= -2528.932555  
 Sum of electronic and thermal Enthalpies= -2528.931611  
 Sum of electronic and thermal Free Energies= -2529.094315

-----  
 Cartesian Coordinates  
 -----

|    |           |           |           |
|----|-----------|-----------|-----------|
| 6  | -4.193125 | 2.277219  | 0.727851  |
| 6  | -2.800377 | 2.196686  | 0.318265  |
| 7  | -2.469595 | 0.894391  | 0.066600  |
| 6  | -3.583808 | 0.131900  | 0.307495  |
| 6  | -4.678912 | 0.994606  | 0.723195  |
| 6  | -1.914650 | 3.268237  | 0.237882  |
| 6  | -0.578133 | 3.218932  | -0.127616 |
| 7  | 0.106264  | 2.077608  | -0.502470 |
| 6  | 1.395392  | 2.459297  | -0.797449 |
| 6  | 1.540443  | 3.887901  | -0.590643 |
| 6  | 0.319116  | 4.358074  | -0.177715 |
| 6  | 2.401206  | 1.607644  | -1.227525 |
| 6  | 2.297558  | 0.241193  | -1.434128 |
| 7  | 1.165954  | -0.504795 | -1.213565 |
| 6  | 1.479681  | -1.814739 | -1.514569 |
| 6  | 2.867109  | -1.895105 | -1.938382 |
| 6  | 3.372279  | -0.622139 | -1.891316 |
| 77 | -0.626361 | 0.189440  | -0.538847 |
| 7  | -1.387559 | -1.737843 | -0.610598 |
| 6  | -0.715064 | -2.863492 | -0.992314 |
| 6  | -1.591106 | -4.017965 | -0.876575 |
| 6  | -2.796703 | -3.551896 | -0.417241 |
| 6  | -2.655485 | -2.113088 | -0.255214 |
| 6  | 4.738387  | -0.143665 | -2.275327 |
| 6  | 4.779037  | 0.476509  | -3.683301 |
| 6  | 3.550485  | -3.151851 | -2.385870 |
| 6  | 3.200122  | -3.540126 | -3.833592 |
| 6  | 0.612971  | -2.892518 | -1.410731 |
| 6  | -0.081552 | 5.773295  | 0.112148  |
| 6  | -0.800691 | 6.442906  | -1.072980 |
| 6  | 2.800381  | 4.657825  | -0.847071 |
| 6  | 3.031887  | 4.944927  | -2.341561 |
| 6  | -3.657303 | -1.249730 | 0.174024  |
| 6  | -4.063023 | -4.318785 | -0.181993 |
| 6  | -5.053180 | -4.206379 | -1.355513 |
| 6  | -1.214916 | -5.417158 | -1.260806 |
| 6  | -1.269150 | -5.653756 | -2.780990 |
| 6  | -6.073572 | 0.526333  | 1.010800  |
| 6  | -6.893278 | 0.279344  | -0.268702 |

|   |           |           |           |
|---|-----------|-----------|-----------|
| 6 | -4.922819 | 3.552764  | 1.023487  |
| 6 | -5.342410 | 4.307532  | -0.250873 |
| 6 | -0.272925 | -0.252556 | 1.481817  |
| 6 | 0.485660  | -1.362704 | 1.830739  |
| 6 | 0.899672  | -1.588519 | 3.157233  |
| 6 | 0.485084  | -0.702205 | 4.182983  |
| 6 | -0.320342 | 0.392720  | 3.839054  |
| 6 | -0.695536 | 0.603644  | 2.517838  |
| 8 | 0.835818  | -0.863558 | 5.470813  |
| 6 | 1.795296  | -2.692232 | 3.502700  |
| 8 | 2.164930  | -2.960474 | 4.649124  |
| 6 | -1.503687 | 0.268668  | -2.545128 |
| 8 | 2.222826  | -3.406202 | 2.442025  |
| 6 | 3.130202  | -4.475464 | 2.741361  |
| 6 | 3.060952  | 1.019475  | 1.909817  |
| 6 | 3.819910  | -0.119219 | 1.538381  |
| 6 | 5.143658  | -0.019890 | 1.216982  |
| 6 | 5.878619  | 1.290595  | 1.249831  |
| 6 | 4.999025  | 2.456543  | 1.603473  |
| 6 | 3.680091  | 2.295160  | 1.921755  |
| 1 | -4.608787 | -1.705188 | 0.423181  |
| 1 | -2.308721 | 4.243262  | 0.499889  |
| 1 | 3.373419  | 2.052795  | -1.396943 |
| 1 | 1.017261  | -3.863954 | -1.670083 |
| 1 | -0.923234 | -0.406711 | -3.175457 |
| 1 | -2.549912 | -0.030057 | -2.499413 |
| 1 | -1.401266 | 1.310554  | -2.857744 |
| 1 | -0.206283 | -5.644796 | -0.893718 |
| 1 | -1.884927 | -6.124852 | -0.760886 |
| 1 | -0.596682 | -4.969502 | -3.307537 |
| 1 | -2.279776 | -5.478676 | -3.162308 |
| 1 | 3.285584  | -3.977794 | -1.713658 |
| 1 | 4.635000  | -3.026346 | -2.297779 |
| 1 | 5.444875  | -0.979235 | -2.225795 |
| 1 | 5.086552  | 0.589767  | -1.539988 |
| 1 | -3.823704 | -5.373956 | -0.011370 |
| 1 | -4.546736 | -3.965992 | 0.737068  |
| 1 | 3.654063  | 4.102954  | -0.440472 |
| 1 | 2.764479  | 5.605919  | -0.299538 |
| 1 | -0.980200 | -6.679538 | -3.031993 |
| 1 | 0.808032  | 6.357228  | 0.371218  |
| 1 | -0.730948 | 5.803079  | 0.995687  |
| 1 | -1.089622 | 7.470429  | -0.829591 |
| 1 | -1.703673 | 5.888604  | -1.346735 |
| 1 | -0.151018 | 6.468262  | -1.953141 |
| 1 | 2.210011  | 5.538260  | -2.754094 |
| 1 | 3.085819  | 4.014897  | -2.915586 |
| 1 | 3.964634  | 5.496892  | -2.495959 |
| 1 | 4.092059  | 1.325240  | -3.755822 |
| 1 | 4.477373  | -0.255845 | -4.438497 |
| 1 | 5.785897  | 0.828823  | -3.929845 |
| 1 | 3.704929  | -4.465937 | -4.128062 |
| 1 | 3.501163  | -2.749245 | -4.527317 |
| 1 | 2.121756  | -3.685753 | -3.949420 |
| 1 | -5.971487 | -4.766859 | -1.152586 |
| 1 | -4.607497 | -4.598478 | -2.274813 |
| 1 | -5.322605 | -3.162027 | -1.540782 |
| 1 | -6.586875 | 1.268977  | 1.630954  |
| 1 | -6.042108 | -0.394585 | 1.605926  |
| 1 | -7.902619 | -0.070904 | -0.029672 |



|   |           |           |           |
|---|-----------|-----------|-----------|
| 1 | -6.411001 | -0.470897 | -0.902850 |
| 1 | -6.978819 | 1.199290  | -0.855139 |
| 1 | -4.294869 | 4.206592  | 1.641752  |
| 1 | -5.812349 | 3.333413  | 1.623573  |
| 1 | -5.864006 | 5.238242  | -0.005236 |
| 1 | -6.008880 | 3.691036  | -0.861797 |
| 1 | -4.470052 | 4.554742  | -0.863682 |
| 1 | 0.815134  | -2.065086 | 1.077784  |
| 1 | -1.304264 | 1.470367  | 2.286903  |
| 1 | -0.630139 | 1.069114  | 4.629041  |
| 1 | 3.372203  | -4.928264 | 1.780063  |
| 1 | 2.660806  | -5.206408 | 3.404116  |
| 1 | 4.031832  | -4.089981 | 3.223176  |
| 1 | 1.399092  | -1.671870 | 5.511482  |
| 1 | 3.079271  | 3.164449  | 2.176374  |
| 1 | 3.327404  | -1.085466 | 1.494752  |
| 1 | 5.453084  | 3.443864  | 1.622573  |
| 1 | 5.705245  | -0.904152 | 0.927646  |
| 1 | 6.380711  | 1.471008  | 0.280178  |
| 1 | 2.010142  | 0.920974  | 2.143278  |
| 1 | 6.726141  | 1.230260  | 1.960465  |

---

CSS<sup>TS</sup>(C-P)

---

Number of imaginary frequencies : 1 Electronic energy : HF=-2529.9990475  
Zero-point correction= 1.016501 (Hartree/Particle)  
Thermal correction to Energy= 1.076758  
Thermal correction to Enthalpy= 1.077702  
Thermal correction to Gibbs Free Energy= 0.920175  
Sum of electronic and zero-point Energies= -2528.982546  
Sum of electronic and thermal Energies= -2528.922290  
Sum of electronic and thermal Enthalpies= -2528.921345  
Sum of electronic and thermal Free Energies= -2529.078873

.....  
Cartesian Coordinates

|    |           |           |           |
|----|-----------|-----------|-----------|
| 6  | 0.111225  | -1.603250 | 3.753758  |
| 6  | 0.275198  | -1.950235 | 2.373304  |
| 6  | 1.487705  | -2.630721 | 1.974003  |
| 6  | 2.509574  | -2.796557 | 2.840085  |
| 6  | 2.455012  | -2.298694 | 4.248175  |
| 6  | 1.141480  | -1.696361 | 4.627181  |
| 6  | 0.268127  | 0.233655  | 1.411185  |
| 6  | 1.662229  | 0.230362  | 1.618166  |
| 6  | 2.280819  | 0.816424  | 2.721426  |
| 6  | 1.477032  | 1.472721  | 3.697958  |
| 6  | 0.083161  | 1.553491  | 3.495905  |
| 6  | -0.490742 | 0.914060  | 2.417309  |
| 77 | -0.545027 | 0.062557  | -0.615373 |
| 6  | -1.299601 | 0.004188  | -2.602533 |
| 6  | 3.724276  | 0.725644  | 2.940463  |
| 8  | 4.398938  | 0.144685  | 1.938810  |
| 6  | 5.819875  | 0.043017  | 2.113553  |
| 8  | 1.997899  | 2.023133  | 4.796937  |
| 7  | -1.382972 | 1.914526  | -0.333852 |
| 6  | -0.763027 | 3.119851  | -0.532799 |
| 6  | -1.681648 | 4.201216  | -0.202886 |
| 6  | -2.853401 | 3.615770  | 0.197345  |
| 6  | -2.651147 | 2.175620  | 0.116515  |

|   |           |           |           |
|---|-----------|-----------|-----------|
| 6 | -1.374190 | 5.659773  | -0.360318 |
| 6 | -1.485825 | 6.137364  | -1.819586 |
| 6 | 0.546135  | 3.285918  | -0.967505 |
| 6 | 1.445039  | 2.285708  | -1.320006 |
| 7 | 1.184886  | 0.941664  | -1.284037 |
| 6 | 2.320134  | 0.293459  | -1.700597 |
| 6 | 3.352591  | 1.270932  | -2.013244 |
| 6 | 2.809801  | 2.506593  | -1.778518 |
| 6 | -3.586459 | 1.212837  | 0.477161  |
| 6 | -3.425394 | -0.168198 | 0.427927  |
| 7 | -2.287663 | -0.816222 | 0.020420  |
| 6 | -2.553556 | -2.163999 | 0.049450  |
| 6 | -3.909510 | -2.382957 | 0.531137  |
| 6 | -4.449690 | -1.145645 | 0.766669  |
| 6 | -4.142023 | 4.276060  | 0.585202  |
| 6 | -5.173413 | 4.285498  | -0.557622 |
| 6 | 2.467945  | -1.084855 | -1.788119 |
| 6 | 1.512889  | -2.048770 | -1.480034 |
| 7 | 0.262378  | -1.790774 | -0.979062 |
| 6 | -0.377328 | -2.995862 | -0.831090 |
| 6 | 0.513197  | -4.072234 | -1.235944 |
| 6 | 1.687952  | -3.484304 | -1.636172 |
| 6 | 4.712638  | 0.934297  | -2.545883 |
| 6 | 4.702430  | 0.610404  | -4.050745 |
| 6 | 3.428662  | 3.853792  | -1.999797 |
| 6 | 2.989339  | 4.499700  | -3.326402 |
| 6 | -1.669287 | -3.163104 | -0.341809 |
| 6 | 0.142082  | -5.524523 | -1.262254 |
| 6 | -0.714185 | -5.897262 | -2.486044 |
| 6 | 2.909229  | -4.139311 | -2.208675 |
| 6 | 2.957931  | -4.068818 | -3.745696 |
| 6 | -4.568019 | -3.724858 | 0.648017  |
| 6 | -5.079606 | -4.257715 | -0.702807 |
| 6 | -5.843309 | -0.805769 | 1.202911  |
| 6 | -6.758757 | -0.420146 | 0.026614  |
| 8 | 4.293939  | 1.122883  | 3.964382  |
| 1 | -2.026720 | -4.183322 | -0.260901 |
| 1 | -4.545374 | 1.576381  | 0.828367  |
| 1 | 0.902661  | 4.306438  | -1.047941 |
| 1 | 3.425916  | -1.448422 | -2.142020 |
| 1 | 3.811824  | -3.669404 | -1.797339 |
| 1 | 2.943561  | -5.188425 | -1.894225 |
| 1 | 2.936388  | -3.029892 | -4.087875 |
| 1 | 2.091584  | -4.575658 | -4.181396 |
| 1 | 5.125861  | 0.079472  | -1.994605 |
| 1 | 5.394727  | 1.771866  | -2.362020 |
| 1 | 4.520480  | 3.761484  | -1.987787 |
| 1 | 3.171748  | 4.522840  | -1.168956 |
| 1 | 1.051890  | -6.135090 | -1.258679 |
| 1 | -0.402701 | -5.786794 | -0.346394 |
| 1 | -0.364045 | 5.870011  | 0.013135  |
| 1 | -2.055970 | 6.246769  | 0.264890  |
| 1 | 3.865378  | -4.541824 | -4.135669 |
| 1 | -3.944334 | 5.306049  | 0.901849  |
| 1 | -4.573692 | 3.768728  | 1.457433  |
| 1 | -6.108487 | 4.761388  | -0.243836 |
| 1 | -5.399488 | 3.266776  | -0.886847 |
| 1 | -4.783497 | 4.830568  | -1.422691 |
| 1 | -2.500839 | 5.982901  | -2.198326 |
| 1 | -0.805452 | 5.575306  | -2.466417 |

|   |           |           |           |
|---|-----------|-----------|-----------|
| 1 | -1.243968 | 7.201802  | -1.907660 |
| 1 | 1.901947  | 4.615752  | -3.361515 |
| 1 | 3.279624  | 3.872007  | -4.174515 |
| 1 | 3.445214  | 5.486842  | -3.456683 |
| 1 | 5.705331  | 0.354920  | -4.409035 |
| 1 | 4.340300  | 1.468357  | -4.625280 |
| 1 | 4.036265  | -0.231024 | -4.263798 |
| 1 | -0.981770 | -6.959046 | -2.473707 |
| 1 | -0.170740 | -5.690073 | -3.412893 |
| 1 | -1.636760 | -5.309668 | -2.508864 |
| 1 | -5.406078 | -3.660896 | 1.350942  |
| 1 | -3.865340 | -4.449169 | 1.079347  |
| 1 | -5.542361 | -5.243830 | -0.590082 |
| 1 | -4.261014 | -4.342097 | -1.423867 |
| 1 | -5.822126 | -3.576206 | -1.128779 |
| 1 | -5.817007 | 0.019287  | 1.925912  |
| 1 | -6.278915 | -1.659735 | 1.733619  |
| 1 | -7.764774 | -0.164009 | 0.375257  |
| 1 | -6.841558 | -1.248228 | -0.683823 |
| 1 | -6.353917 | 0.438688  | -0.517022 |
| 1 | 2.293980  | -0.283389 | 0.904390  |
| 1 | -1.572206 | 0.938069  | 2.316457  |
| 1 | -0.506557 | 2.089273  | 4.233123  |
| 1 | 6.190165  | -0.421624 | 1.200621  |
| 1 | 6.058244  | -0.572621 | 2.984520  |
| 1 | 6.261239  | 1.032796  | 2.249058  |
| 1 | 2.971687  | 1.844019  | 4.771693  |
| 1 | -0.471985 | 0.002087  | -3.321634 |
| 1 | -1.897886 | -0.901175 | -2.759013 |
| 1 | -1.932881 | 0.877941  | -2.797122 |
| 1 | -0.842072 | -1.203120 | 4.076072  |
| 1 | 1.558805  | -3.003146 | 0.960589  |
| 1 | 1.011728  | -1.385258 | 5.659796  |
| 1 | 3.411423  | -3.314337 | 2.525695  |
| 1 | 3.270937  | -1.581817 | 4.438111  |
| 1 | 2.678779  | -3.128242 | 4.941462  |
| 1 | -0.594232 | -2.033377 | 1.739254  |

---

**cssp**

---

Number of imaginary frequencies : 0 Electronic energy : HF=-2530.0981094  
Zero-point correction= 1.020602 (Hartree/Particle)  
Thermal correction to Energy= 1.080998  
Thermal correction to Enthalpy= 1.081943  
Thermal correction to Gibbs Free Energy= 0.922560  
Sum of electronic and zero-point Energies= -2529.077507  
Sum of electronic and thermal Energies= -2529.017111  
Sum of electronic and thermal Enthalpies= -2529.016167  
Sum of electronic and thermal Free Energies= -2529.175549

.....  
Cartesian Coordinates

.....  

|   |           |           |           |
|---|-----------|-----------|-----------|
| 6 | -2.073062 | -3.719948 | -0.859143 |
| 6 | -0.924848 | -2.829819 | -0.830079 |
| 7 | -1.353664 | -1.525319 | -0.742426 |
| 6 | -2.729407 | -1.552599 | -0.735723 |
| 6 | -3.191130 | -2.927872 | -0.802942 |
| 6 | 0.404111  | -3.230320 | -0.878495 |
| 6 | 1.523779  | -2.410641 | -0.857490 |

|    |           |           |           |
|----|-----------|-----------|-----------|
| 7  | 1.498396  | -1.039128 | -0.758364 |
| 6  | 2.803986  | -0.609688 | -0.761020 |
| 6  | 3.695600  | -1.753672 | -0.862781 |
| 6  | 2.901562  | -2.869469 | -0.925985 |
| 6  | 3.208692  | 0.714298  | -0.661342 |
| 6  | 2.388845  | 1.827624  | -0.558123 |
| 7  | 1.013626  | 1.799649  | -0.543781 |
| 6  | 0.586238  | 3.101000  | -0.421094 |
| 6  | 1.736156  | 3.987765  | -0.339674 |
| 6  | 2.852478  | 3.198301  | -0.418880 |
| 6  | -0.739115 | 3.501889  | -0.340050 |
| 6  | -1.861047 | 2.683850  | -0.375806 |
| 7  | -1.834356 | 1.315024  | -0.498563 |
| 6  | -3.143209 | 0.886706  | -0.518457 |
| 6  | -4.032502 | 2.027551  | -0.381712 |
| 6  | -3.237642 | 3.141316  | -0.291488 |
| 77 | -0.166943 | 0.141714  | -0.662701 |
| 6  | -0.252904 | 0.248902  | -2.713721 |
| 6  | -3.655283 | 4.578119  | -0.196621 |
| 6  | -3.621095 | 5.299042  | -1.556422 |
| 6  | -5.529468 | 1.949872  | -0.404340 |
| 6  | -6.097649 | 1.808600  | -1.828136 |
| 6  | -3.547854 | -0.436396 | -0.631637 |
| 6  | 4.292839  | 3.607778  | -0.387189 |
| 6  | 4.943298  | 3.634021  | -1.781597 |
| 6  | 1.656170  | 5.480789  | -0.233688 |
| 6  | 1.370806  | 6.159105  | -1.585700 |
| 6  | 3.315717  | -4.300354 | -1.093903 |
| 6  | 3.191787  | -4.789128 | -2.548150 |
| 6  | 5.190819  | -1.661448 | -0.912081 |
| 6  | 5.721995  | -1.211051 | -2.284480 |
| 6  | -4.630751 | -3.342588 | -0.844068 |
| 6  | -5.264643 | -3.163198 | -2.235243 |
| 6  | -1.993543 | -5.211021 | -0.992710 |
| 6  | -1.753696 | -5.666729 | -2.443449 |
| 6  | -0.430817 | 0.320240  | 2.577907  |
| 6  | 0.634550  | -0.568558 | 2.506137  |
| 6  | 1.969002  | -0.118417 | 2.484408  |
| 6  | 2.242737  | 1.266833  | 2.548172  |
| 6  | 1.168032  | 2.167588  | 2.610710  |
| 6  | -0.132771 | 1.700215  | 2.612925  |
| 6  | 3.093022  | -1.053265 | 2.413129  |
| 8  | 4.280660  | -0.708797 | 2.386599  |
| 8  | 3.493527  | 1.759778  | 2.541958  |
| 8  | 2.733334  | -2.345008 | 2.402461  |
| 6  | 3.809149  | -3.292923 | 2.375941  |
| 6  | -1.880424 | -0.146248 | 2.733880  |
| 6  | -2.416452 | 0.279072  | 4.085300  |
| 6  | -2.979105 | -0.550227 | 4.964626  |
| 6  | -3.161388 | -2.022029 | 4.720389  |
| 6  | -2.622339 | -2.455557 | 3.386433  |
| 6  | -2.052116 | -1.626994 | 2.510715  |
| 1  | -4.615987 | -0.618844 | -0.618636 |
| 1  | -0.918032 | 4.565457  | -0.231830 |
| 1  | 4.276347  | 0.894564  | -0.638838 |
| 1  | 0.585745  | -4.296993 | -0.942036 |
| 1  | -1.191621 | -5.599781 | -0.352842 |
| 1  | -2.921000 | -5.660698 | -0.621871 |
| 1  | -0.824912 | -5.242786 | -2.837387 |
| 1  | -2.568833 | -5.331202 | -3.091862 |

|   |           |           |           |
|---|-----------|-----------|-----------|
| 1 | 2.709855  | -4.942650 | -0.442141 |
| 1 | 4.352308  | -4.423078 | -0.761231 |
| 1 | 5.623939  | -2.637617 | -0.665812 |
| 1 | 5.536433  | -0.973395 | -0.131610 |
| 1 | -4.716458 | -4.391685 | -0.541067 |
| 1 | -5.202143 | -2.766696 | -0.105542 |
| 1 | 4.845177  | 2.927579  | 0.271279  |
| 1 | 4.377307  | 4.599975  | 0.068633  |
| 1 | -1.688480 | -6.757678 | -2.509951 |
| 1 | 2.596446  | 5.867610  | 0.173304  |
| 1 | 0.876353  | 5.762612  | 0.485153  |
| 1 | 1.309099  | 7.246933  | -1.477728 |
| 1 | 0.427479  | 5.802475  | -2.010689 |
| 1 | 2.162983  | 5.929374  | -2.304886 |
| 1 | 4.429131  | 4.346632  | -2.434255 |
| 1 | 4.887527  | 2.651832  | -2.261007 |
| 1 | 5.997058  | 3.924674  | -1.719774 |
| 1 | 5.319398  | -0.231542 | -2.559196 |
| 1 | 5.424211  | -1.918706 | -3.064546 |
| 1 | 6.814671  | -1.143293 | -2.281111 |
| 1 | 3.490595  | -5.838435 | -2.640238 |
| 1 | 3.826955  | -4.191232 | -3.208802 |
| 1 | 2.162131  | -4.692538 | -2.905579 |
| 1 | -6.317470 | -3.463682 | -2.231762 |
| 1 | -4.737409 | -3.767969 | -2.979494 |
| 1 | -5.207000 | -2.119763 | -2.559823 |
| 1 | -5.948332 | 2.847189  | 0.063856  |
| 1 | -5.867228 | 1.103736  | 0.206882  |
| 1 | -7.190483 | 1.743537  | -1.812857 |
| 1 | -5.707493 | 0.910896  | -2.317376 |
| 1 | -5.813389 | 2.667770  | -2.443379 |
| 1 | -3.006368 | 5.108885  | 0.511174  |
| 1 | -4.667413 | 4.637555  | 0.218103  |
| 1 | -3.919199 | 6.347727  | -1.455585 |
| 1 | -4.300099 | 4.815599  | -2.265424 |
| 1 | -2.616787 | 5.267754  | -1.989728 |
| 1 | 0.451788  | -1.635045 | 2.489055  |
| 1 | -0.949015 | 2.416380  | 2.631525  |
| 1 | 1.389626  | 3.228019  | 2.621367  |
| 1 | 3.331866  | -4.270033 | 2.311557  |
| 1 | 4.407422  | -3.215503 | 3.287277  |
| 1 | 4.447394  | -3.120780 | 1.509493  |
| 1 | 4.097690  | 0.979923  | 2.478163  |
| 1 | 0.187139  | -0.660528 | -3.130276 |
| 1 | -1.299644 | 0.333236  | -3.016116 |
| 1 | 0.307670  | 1.126596  | -3.044402 |
| 1 | -2.316100 | 1.333661  | 4.331585  |
| 1 | -1.682578 | -2.015512 | 1.570696  |
| 1 | -3.334745 | -0.161034 | 5.916740  |
| 1 | -2.716217 | -3.510380 | 3.135277  |
| 1 | -2.677477 | -2.598100 | 5.525622  |
| 1 | -4.228725 | -2.285753 | 4.799042  |
| 1 | -2.457357 | 0.381457  | 1.959184  |

---

**TS(B-D)**

---

Number of imaginary frequencies : 1 Electronic energy : HF=-2529.9674768  
Zero-point correction= 1.011533 (Hartree/Particle)  
Thermal correction to Energy= 1.072460

Thermal correction to Enthalpy= 1.073405  
 Thermal correction to Gibbs Free Energy= 0.913819  
 Sum of electronic and zero-point Energies= -2528.955944  
 Sum of electronic and thermal Energies= -2528.895016  
 Sum of electronic and thermal Enthalpies= -2528.894072  
 Sum of electronic and thermal Free Energies= -2529.053658

.....  
 Cartesian Coordinates  
 .....

|    |           |           |           |
|----|-----------|-----------|-----------|
| 6  | 4.018580  | 2.197512  | -0.291249 |
| 6  | 3.207628  | 0.991773  | -0.379070 |
| 7  | 1.884245  | 1.336165  | -0.463867 |
| 6  | 1.811892  | 2.706880  | -0.448259 |
| 6  | 3.153567  | 3.260120  | -0.333192 |
| 6  | 3.695264  | -0.309624 | -0.358460 |
| 6  | 2.950761  | -1.483069 | -0.428872 |
| 7  | 1.584723  | -1.549702 | -0.560452 |
| 6  | 1.234594  | -2.879218 | -0.575686 |
| 6  | 2.428156  | -3.692180 | -0.424521 |
| 6  | 3.492523  | -2.826403 | -0.337838 |
| 6  | -0.059699 | -3.369482 | -0.710886 |
| 6  | -1.222894 | -2.626181 | -0.875561 |
| 7  | -1.283751 | -1.256625 | -0.886878 |
| 6  | -2.601475 | -0.903817 | -1.020160 |
| 6  | -3.419204 | -2.102902 | -1.109185 |
| 6  | -2.565012 | -3.172319 | -1.015044 |
| 77 | 0.299030  | 0.040424  | -0.638500 |
| 7  | -0.989556 | 1.633740  | -0.746841 |
| 6  | -2.358681 | 1.561332  | -0.822370 |
| 6  | -2.924792 | 2.894102  | -0.697183 |
| 6  | -1.869061 | 3.761724  | -0.587480 |
| 6  | -0.657178 | 2.958315  | -0.620261 |
| 6  | -2.887200 | -4.633498 | -1.104390 |
| 6  | -2.612542 | -5.217949 | -2.501661 |
| 6  | -4.903952 | -2.098362 | -1.317166 |
| 6  | -5.300194 | -1.787846 | -2.771794 |
| 6  | -3.092763 | 0.394643  | -0.978809 |
| 6  | 4.951950  | -3.154447 | -0.235551 |
| 6  | 5.678772  | -3.063629 | -1.589549 |
| 6  | 2.450305  | -5.191278 | -0.447547 |
| 6  | 2.380643  | -5.764351 | -1.874720 |
| 6  | 0.639015  | 3.448844  | -0.505302 |
| 6  | -1.901078 | 5.254626  | -0.466070 |
| 6  | -1.638081 | 5.965485  | -1.805748 |
| 6  | -4.393644 | 3.185331  | -0.655809 |
| 6  | -5.054397 | 3.177206  | -2.045481 |
| 6  | 3.475288  | 4.724221  | -0.340403 |
| 6  | 3.444801  | 5.332461  | -1.754331 |
| 6  | 5.516673  | 2.215494  | -0.240522 |
| 6  | 6.161241  | 2.001928  | -1.622145 |
| 6  | -0.041269 | 0.069064  | 1.523296  |
| 6  | -1.295265 | -0.546121 | 1.884443  |
| 6  | -2.360120 | 0.241439  | 2.202417  |
| 6  | -2.159594 | 1.688466  | 2.470055  |
| 6  | -0.751339 | 2.127062  | 2.542827  |
| 6  | 0.271793  | 1.318197  | 2.174315  |
| 6  | -3.728986 | -0.337984 | 2.160803  |
| 8  | -4.729922 | 0.210185  | 1.748511  |
| 8  | -3.083099 | 2.473793  | 2.680567  |
| 6  | 0.505938  | 0.146584  | -2.733684 |

|   |           |           |           |
|---|-----------|-----------|-----------|
| 8 | -3.720104 | -1.619877 | 2.611305  |
| 6 | -4.965836 | -2.318627 | 2.496317  |
| 6 | 1.656826  | -1.483025 | 2.752708  |
| 6 | 0.791394  | -1.789863 | 3.912334  |
| 6 | 0.900245  | -1.132633 | 5.074054  |
| 6 | 1.939128  | -0.076251 | 5.319661  |
| 6 | 2.932046  | 0.051696  | 4.200976  |
| 6 | 2.812723  | -0.607243 | 3.039456  |
| 1 | 0.743182  | 4.525441  | -0.436797 |
| 1 | 4.769288  | -0.423626 | -0.265811 |
| 1 | -0.171987 | -4.447482 | -0.695057 |
| 1 | -4.168249 | 0.506146  | -1.012953 |
| 1 | 0.830251  | 1.150763  | -3.023527 |
| 1 | 1.252290  | -0.582291 | -3.066214 |
| 1 | -0.452115 | -0.077400 | -3.212837 |
| 1 | -4.876871 | 2.454327  | 0.002180  |
| 1 | -4.551332 | 4.161705  | -0.186495 |
| 1 | -4.927047 | 2.209167  | -2.540230 |
| 1 | -4.605681 | 3.936836  | -2.693815 |
| 1 | -5.365643 | -1.362029 | -0.648105 |
| 1 | -5.315451 | -3.073771 | -1.033503 |
| 1 | -3.940380 | -4.790894 | -0.847412 |
| 1 | -2.306907 | -5.190233 | -0.357692 |
| 1 | -2.875813 | 5.563911  | -0.075404 |
| 1 | -1.160780 | 5.583708  | 0.273649  |
| 1 | 1.613515  | -5.585474 | 0.142218  |
| 1 | 3.361766  | -5.550806 | 0.042282  |
| 1 | -6.127284 | 3.381607  | -1.970496 |
| 1 | 5.071630  | -4.164061 | 0.172037  |
| 1 | 5.435937  | -2.479348 | 0.481318  |
| 1 | 6.743031  | -3.297158 | -1.482693 |
| 1 | 5.588114  | -2.059602 | -2.014830 |
| 1 | 5.243636  | -3.764920 | -2.307904 |
| 1 | 3.233999  | -5.423749 | -2.468869 |
| 1 | 1.471504  | -5.431534 | -2.384433 |
| 1 | 2.386492  | -6.859057 | -1.861058 |
| 1 | -1.562424 | -5.086018 | -2.779726 |
| 1 | -3.218829 | -4.708527 | -3.256770 |
| 1 | -2.845948 | -6.287136 | -2.536570 |
| 1 | -6.388435 | -1.780989 | -2.890279 |
| 1 | -4.883959 | -2.535704 | -3.453878 |
| 1 | -4.915954 | -0.810832 | -3.079427 |
| 1 | -1.659577 | 7.053769  | -1.687112 |
| 1 | -2.395535 | 5.685167  | -2.544118 |
| 1 | -0.662094 | 5.684510  | -2.214106 |
| 1 | 4.465588  | 4.882774  | 0.100271  |
| 1 | 2.767729  | 5.264274  | 0.301121  |
| 1 | 3.671304  | 6.403275  | -1.728286 |
| 1 | 2.460951  | 5.200304  | -2.214305 |
| 1 | 4.178661  | 4.841460  | -2.400718 |
| 1 | 5.875942  | 1.441594  | 0.449789  |
| 1 | 5.856784  | 3.171053  | 0.173143  |
| 1 | 7.253984  | 2.007856  | -1.553889 |
| 1 | 5.855686  | 2.791796  | -2.314925 |
| 1 | 5.848733  | 1.046776  | -2.054874 |
| 1 | -1.438229 | -1.604858 | 1.704383  |
| 1 | 1.300282  | 1.662960  | 2.187758  |
| 1 | -0.595328 | 3.156634  | 2.848946  |
| 1 | -4.825368 | -3.260950 | 3.026122  |
| 1 | -5.201042 | -2.507918 | 1.446344  |

|   |           |           |          |
|---|-----------|-----------|----------|
| 1 | -5.776520 | -1.739832 | 2.943886 |
| 1 | 0.993673  | -0.873969 | 1.916279 |
| 1 | 3.545139  | -0.478859 | 2.250073 |
| 1 | 0.026329  | -2.549982 | 3.783116 |
| 1 | 3.784483  | 0.706396  | 4.366510 |
| 1 | 0.226091  | -1.365170 | 5.894396 |
| 1 | 2.465150  | -0.279625 | 6.265536 |
| 1 | 1.893544  | -2.343221 | 2.118916 |
| 1 | 1.445188  | 0.895074  | 5.486355 |

-----  
**D**  
-----

Number of imaginary frequencies : 0 Electronic energy : HF=-2530.0443354  
Zero-point correction= 1.017885 (Hartree/Particle)  
Thermal correction to Energy= 1.079120  
Thermal correction to Enthalpy= 1.080064  
Thermal correction to Gibbs Free Energy= 0.917365  
Sum of electronic and zero-point Energies= -2529.026451  
Sum of electronic and thermal Energies= -2528.965215  
Sum of electronic and thermal Enthalpies= -2528.964271  
Sum of electronic and thermal Free Energies= -2529.126971

-----  
Cartesian Coordinates  
-----

|    |           |           |           |
|----|-----------|-----------|-----------|
| 6  | 2.405264  | 0.144294  | 3.094864  |
| 6  | 0.953679  | -0.074952 | 3.429938  |
| 6  | 0.575413  | 0.479856  | 4.776560  |
| 6  | 1.410470  | 1.184605  | 5.541553  |
| 6  | 2.835329  | 1.482081  | 5.162906  |
| 6  | 3.238969  | 0.851903  | 3.858486  |
| 6  | 0.050646  | 0.542771  | 2.301688  |
| 6  | -1.340827 | 0.017551  | 2.322624  |
| 6  | -2.440708 | 0.792374  | 2.239253  |
| 6  | -2.322461 | 2.278564  | 2.155734  |
| 6  | -0.945600 | 2.811418  | 2.163774  |
| 6  | 0.138739  | 2.028852  | 2.238607  |
| 6  | -3.786867 | 0.157669  | 2.153514  |
| 8  | -3.798252 | -1.042113 | 2.788591  |
| 6  | -5.008105 | -1.798573 | 2.653925  |
| 8  | -3.292711 | 3.027032  | 2.112011  |
| 8  | -4.753418 | 0.613168  | 1.579868  |
| 77 | 0.307935  | -0.214231 | -0.747467 |
| 6  | 0.533211  | -0.565563 | -2.762074 |
| 7  | 2.105585  | 0.768603  | -0.684460 |
| 6  | 3.343544  | 0.195943  | -0.501820 |
| 6  | 4.366043  | 1.227655  | -0.528020 |
| 6  | 3.720880  | 2.420848  | -0.730220 |
| 6  | 2.302294  | 2.121638  | -0.828176 |
| 6  | 5.838523  | 0.972618  | -0.408125 |
| 6  | 6.463627  | 0.462207  | -1.719033 |
| 6  | 3.573422  | -1.157452 | -0.288552 |
| 6  | 2.621058  | -2.166620 | -0.212086 |
| 7  | 1.264397  | -1.984253 | -0.349135 |
| 6  | 0.673952  | -3.218222 | -0.205421 |
| 6  | 1.695044  | -4.221331 | 0.043912  |
| 6  | 2.901761  | -3.569711 | 0.039034  |
| 6  | 1.292277  | 3.059105  | -1.003409 |
| 6  | -0.071653 | 2.812391  | -1.066001 |
| 7  | -0.652909 | 1.566073  | -1.006738 |



|   |           |           |           |
|---|-----------|-----------|-----------|
| 6 | -2.015477 | 1.756037  | -1.061832 |
| 6 | -2.311075 | 3.177812  | -1.121521 |
| 6 | -1.106631 | 3.830890  | -1.136973 |
| 6 | 4.316724  | 3.787304  | -0.888605 |
| 6 | 4.426538  | 4.221396  | -2.361452 |
| 6 | -0.690869 | -3.463048 | -0.287719 |
| 6 | -1.693797 | -2.533348 | -0.528780 |
| 7 | -1.492486 | -1.183727 | -0.714480 |
| 6 | -2.729619 | -0.613076 | -0.900857 |
| 6 | -3.756539 | -1.640130 | -0.848057 |
| 6 | -3.114657 | -2.828966 | -0.608678 |
| 6 | 1.429848  | -5.688668 | 0.200305  |
| 6 | 1.214326  | -6.401495 | -1.147139 |
| 6 | 4.275212  | -4.151113 | 0.191630  |
| 6 | 4.988046  | -4.357173 | -1.157212 |
| 6 | -2.965228 | 0.746827  | -1.043846 |
| 6 | -5.216841 | -1.390022 | -1.077771 |
| 6 | -5.552719 | -1.151477 | -2.560794 |
| 6 | -3.705603 | -4.203735 | -0.513670 |
| 6 | -3.574631 | -4.999177 | -1.824937 |
| 6 | -3.695263 | 3.750639  | -1.132120 |
| 6 | -4.366833 | 3.680867  | -2.514880 |
| 6 | -0.849291 | 5.304730  | -1.222899 |
| 6 | -0.478069 | 5.763114  | -2.644621 |
| 1 | 1.599997  | 4.096238  | -1.069473 |
| 1 | 4.606064  | -1.456132 | -0.149782 |
| 1 | -1.007430 | -4.490008 | -0.145970 |
| 1 | -4.001088 | 1.056063  | -1.085873 |
| 1 | 0.150374  | 0.299530  | -3.308180 |
| 1 | 1.595431  | -0.709764 | -2.972855 |
| 1 | -0.031683 | -1.463274 | -3.023857 |
| 1 | -4.301690 | 3.225649  | -0.385698 |
| 1 | -3.654894 | 4.793530  | -0.801624 |
| 1 | -4.436868 | 2.647891  | -2.869981 |
| 1 | -3.790494 | 4.243724  | -3.256379 |
| 1 | -5.537084 | -0.531624 | -0.477328 |
| 1 | -5.793939 | -2.248659 | -0.716033 |
| 1 | -4.764500 | -4.128217 | -0.243400 |
| 1 | -3.224599 | -4.761197 | 0.299850  |
| 1 | -1.739793 | 5.846887  | -0.888588 |
| 1 | -0.045795 | 5.583826  | -0.529480 |
| 1 | 0.549541  | -5.842631 | 0.836714  |
| 1 | 2.268682  | -6.157277 | 0.726241  |
| 1 | -5.378762 | 4.096854  | -2.479937 |
| 1 | 4.209134  | -5.110976 | 0.715151  |
| 1 | 4.886354  | -3.500228 | 0.829325  |
| 1 | 5.990891  | -4.772795 | -1.014899 |
| 1 | 5.082569  | -3.410560 | -1.698000 |
| 1 | 4.419118  | -5.042867 | -1.792480 |
| 1 | 2.100826  | -6.302957 | -1.781034 |
| 1 | 0.371530  | -5.963458 | -1.690519 |
| 1 | 1.012436  | -7.467769 | -1.002253 |
| 1 | -2.524575 | -5.102980 | -2.115015 |
| 1 | -4.091757 | -4.483316 | -2.639650 |
| 1 | -4.003990 | -6.001366 | -1.724804 |
| 1 | -6.623085 | -0.965303 | -2.694756 |
| 1 | -5.276406 | -2.020305 | -3.166675 |
| 1 | -5.005025 | -0.289286 | -2.952770 |
| 1 | -0.288499 | 6.841014  | -2.675875 |
| 1 | -1.288225 | 5.536298  | -3.344367 |

|   |           |           |           |
|---|-----------|-----------|-----------|
| 1 | 0.418782  | 5.247109  | -3.001677 |
| 1 | 5.311662  | 3.807330  | -0.430830 |
| 1 | 3.715269  | 4.521746  | -0.338451 |
| 1 | 4.855530  | 5.225065  | -2.446478 |
| 1 | 3.443083  | 4.226739  | -2.841063 |
| 1 | 5.061708  | 3.527747  | -2.920868 |
| 1 | 6.026398  | 0.244058  | 0.390653  |
| 1 | 6.344750  | 1.894379  | -0.101788 |
| 1 | 7.535735  | 0.275255  | -1.599420 |
| 1 | 6.330043  | 1.195740  | -2.519961 |
| 1 | 5.987150  | -0.468208 | -2.042676 |
| 1 | -1.452108 | -1.061670 | 2.363461  |
| 1 | 1.138460  | 2.452417  | 2.240498  |
| 1 | -0.872380 | 3.892201  | 2.103237  |
| 1 | -4.928006 | -2.614562 | 3.372295  |
| 1 | -5.089443 | -2.195286 | 1.639413  |
| 1 | -5.878737 | -1.175738 | 2.868228  |
| 1 | 0.530244  | 0.144291  | 1.378954  |
| 1 | 2.754133  | -0.290892 | 2.161758  |
| 1 | -0.448865 | 0.309058  | 5.100651  |
| 1 | 4.272482  | 0.983125  | 3.544368  |
| 1 | 1.064588  | 1.575565  | 6.496091  |
| 1 | 3.512557  | 1.147067  | 5.964386  |
| 1 | 0.746018  | -1.155969 | 3.403147  |
| 1 | 2.987257  | 2.572489  | 5.115164  |

-----  
<sup>3</sup>TS(B-C)  
-----

Number of imaginary frequencies : 1 Electronic energy : HF=-2529.9512532  
Zero-point correction= 1.008107 (Hartree/Particle)  
Thermal correction to Energy= 1.069725  
Thermal correction to Enthalpy= 1.070669  
Thermal correction to Gibbs Free Energy= 0.904526  
Sum of electronic and zero-point Energies= -2528.937351  
Sum of electronic and thermal Energies= -2528.875734  
Sum of electronic and thermal Enthalpies= -2528.874790  
Sum of electronic and thermal Free Energies= -2529.040933

.....  
Cartesian Coordinates  
.....

|    |           |           |           |
|----|-----------|-----------|-----------|
| 6  | 0.992793  | 0.022228  | 4.116141  |
| 6  | 0.278966  | -0.613573 | 3.020955  |
| 7  | -0.125104 | 0.336784  | 2.118053  |
| 6  | 0.305105  | 1.557072  | 2.594025  |
| 6  | 1.005703  | 1.367071  | 3.853133  |
| 6  | 0.026435  | -1.974293 | 2.906721  |
| 6  | -0.693850 | -2.603790 | 1.902141  |
| 7  | -1.256585 | -1.970901 | 0.814083  |
| 6  | -1.892840 | -2.943584 | 0.065917  |
| 6  | -1.729368 | -4.232854 | 0.709122  |
| 6  | -0.985032 | -4.023410 | 1.842645  |
| 6  | -2.569755 | -2.723050 | -1.124161 |
| 6  | -2.723802 | -1.507938 | -1.784372 |
| 7  | -2.216897 | -0.315605 | -1.346283 |
| 6  | -2.536864 | 0.634897  | -2.283815 |
| 6  | -3.288364 | 0.015320  | -3.364713 |
| 6  | -3.408211 | -1.314081 | -3.052720 |
| 77 | -1.140238 | 0.000374  | 0.379750  |

|   |           |           |           |
|---|-----------|-----------|-----------|
| 7 | -1.063383 | 2.030210  | -0.044059 |
| 6 | -1.539545 | 2.632655  | -1.176382 |
| 6 | -1.261045 | 4.059249  | -1.120260 |
| 6 | -0.616217 | 4.288612  | 0.068382  |
| 6 | -0.498915 | 3.001505  | 0.733436  |
| 6 | -4.139922 | -2.387746 | -3.800074 |
| 6 | -5.525500 | -2.691634 | -3.201971 |
| 6 | -3.861251 | 0.751890  | -4.537847 |
| 6 | -5.169940 | 1.487615  | -4.197020 |
| 6 | -2.205677 | 1.981816  | -2.209195 |
| 6 | -0.584656 | -5.019397 | 2.888872  |
| 6 | -1.510121 | -4.994662 | 4.119039  |
| 6 | -2.336273 | -5.513006 | 0.219072  |
| 6 | -3.829036 | -5.638394 | 0.574227  |
| 6 | 0.125182  | 2.776677  | 1.957782  |
| 6 | -0.145691 | 5.591073  | 0.641388  |
| 6 | -1.104638 | 6.159150  | 1.703059  |
| 6 | -1.680448 | 5.054179  | -2.159900 |
| 6 | -3.159034 | 5.462940  | -2.030268 |
| 6 | 1.565908  | 2.475555  | 4.692425  |
| 6 | 0.487363  | 3.207615  | 5.511374  |
| 6 | 1.529888  | -0.698793 | 5.315410  |
| 6 | 0.441062  | -1.014248 | 6.357139  |
| 6 | 0.600365  | -0.098176 | -0.785237 |
| 6 | 1.652755  | 0.801966  | -0.598154 |
| 6 | 2.851920  | 0.703577  | -1.310167 |
| 6 | 3.014567  | -0.333060 | -2.284958 |
| 6 | 1.939618  | -1.244640 | -2.452799 |
| 6 | 0.756826  | -1.119314 | -1.740410 |
| 8 | 4.077174  | -0.446921 | -3.044624 |
| 6 | 3.939352  | 1.672277  | -1.037628 |
| 8 | 5.131090  | 1.502003  | -1.217074 |
| 6 | -3.058183 | 0.625185  | 1.270097  |
| 8 | 3.454563  | 2.832695  | -0.513294 |
| 6 | 4.450721  | 3.794139  | -0.156557 |
| 6 | 5.960004  | -1.453238 | -1.607356 |
| 6 | 5.911124  | -2.898323 | -1.864247 |
| 6 | 6.891396  | -3.546068 | -2.519170 |
| 6 | 8.137728  | -2.856591 | -2.996119 |
| 6 | 8.222010  | -1.415691 | -2.579535 |
| 6 | 7.227528  | -0.787472 | -1.924493 |
| 1 | -2.516207 | 2.599130  | -3.044201 |
| 1 | -3.011074 | -3.592136 | -1.597909 |
| 1 | 0.417027  | -2.608784 | 3.693544  |
| 1 | 0.539972  | 3.645713  | 2.454800  |
| 1 | -2.826952 | 1.292111  | 2.100400  |
| 1 | -3.660509 | 1.116820  | 0.508395  |
| 1 | -3.509489 | -0.312274 | 1.602457  |
| 1 | 0.850858  | 5.462114  | 1.082414  |
| 1 | -0.026246 | 6.321414  | -0.165886 |
| 1 | -1.231596 | 5.456505  | 2.532469  |
| 1 | -2.093941 | 6.339323  | 1.271420  |
| 1 | 2.089425  | 3.197262  | 4.053103  |
| 1 | 2.322687  | 2.070166  | 5.372341  |
| 1 | 2.313487  | -0.093753 | 5.783786  |
| 1 | 2.014738  | -1.631536 | 5.002069  |
| 1 | -1.050790 | 5.947118  | -2.083937 |
| 1 | -1.502356 | 4.643503  | -3.161157 |
| 1 | 0.447885  | -4.829607 | 3.206531  |
| 1 | -0.587464 | -6.024888 | 2.454903  |

|   |           |           |           |
|---|-----------|-----------|-----------|
| 1 | -0.729750 | 7.104278  | 2.108996  |
| 1 | -1.790836 | -6.361374 | 0.645739  |
| 1 | -2.213558 | -5.590470 | -0.868262 |
| 1 | -4.246483 | -6.577183 | 0.196393  |
| 1 | -4.403986 | -4.811098 | 0.147067  |
| 1 | -3.970822 | -5.611723 | 1.658931  |
| 1 | -2.539231 | -5.231662 | 3.832399  |
| 1 | -1.517906 | -4.003588 | 4.582900  |
| 1 | -1.186680 | -5.722466 | 4.870060  |
| 1 | -0.351185 | -1.630297 | 5.920775  |
| 1 | -0.022633 | -0.092391 | 6.721297  |
| 1 | 0.859370  | -1.550509 | 7.214984  |
| 1 | 0.924548  | 4.016419  | 6.105650  |
| 1 | -0.015844 | 2.514616  | 6.192539  |
| 1 | -0.276816 | 3.637824  | 4.856789  |
| 1 | -3.439386 | 6.181916  | -2.806790 |
| 1 | -3.348624 | 5.920154  | -1.054260 |
| 1 | -3.814980 | 4.591214  | -2.117491 |
| 1 | -4.045512 | 0.047092  | -5.355649 |
| 1 | -3.127413 | 1.472220  | -4.919497 |
| 1 | -5.559047 | 2.024650  | -5.068018 |
| 1 | -5.013532 | 2.210408  | -3.390332 |
| 1 | -5.933801 | 0.779914  | -3.860533 |
| 1 | -3.540742 | -3.306826 | -3.813175 |
| 1 | -4.255853 | -2.088324 | -4.847093 |
| 1 | -6.032047 | -3.484321 | -3.761960 |
| 1 | -6.157961 | -1.798862 | -3.222082 |
| 1 | -5.440185 | -3.010162 | -2.158417 |
| 1 | 1.562593  | 1.600033  | 0.124513  |
| 1 | -0.045698 | -1.827386 | -1.916452 |
| 1 | 2.072800  | -2.028769 | -3.192188 |
| 1 | 3.905198  | 4.647059  | 0.248996  |
| 1 | 5.032560  | 4.094013  | -1.032089 |
| 1 | 5.136448  | 3.386838  | 0.591881  |
| 1 | 5.111641  | -0.921676 | -2.363562 |
| 1 | 5.026464  | -3.440244 | -1.538065 |
| 1 | 7.311693  | 0.258971  | -1.650900 |
| 1 | 6.805687  | -4.611796 | -2.718592 |
| 1 | 9.136431  | -0.881407 | -2.826861 |
| 1 | 9.028815  | -3.404736 | -2.645329 |
| 1 | 5.493222  | -1.127115 | -0.672256 |
| 1 | 8.202241  | -2.929246 | -4.096815 |

-----  
<sup>3</sup>C  
-----

Number of imaginary frequencies : 0 Electronic energy : HF=-2530.0088853  
Zero-point correction= 1.014522 (Hartree/Particle)  
Thermal correction to Energy= 1.076316  
Thermal correction to Enthalpy= 1.077260  
Thermal correction to Gibbs Free Energy= 0.913568  
Sum of electronic and zero-point Energies= -2528.994363  
Sum of electronic and thermal Energies= -2528.932569  
Sum of electronic and thermal Enthalpies= -2528.931625  
Sum of electronic and thermal Free Energies= -2529.095317

.....  
Cartesian Coordinates  
.....

|   |           |          |          |
|---|-----------|----------|----------|
| 6 | -4.194471 | 2.276000 | 0.730407 |
| 6 | -2.802170 | 2.195768 | 0.319217 |

|    |           |           |           |
|----|-----------|-----------|-----------|
| 7  | -2.471075 | 0.893432  | 0.068189  |
| 6  | -3.584711 | 0.130623  | 0.310992  |
| 6  | -4.679700 | 0.993176  | 0.727316  |
| 6  | -1.917028 | 3.267666  | 0.236942  |
| 6  | -0.580835 | 3.218615  | -0.129671 |
| 7  | 0.103674  | 2.077175  | -0.504206 |
| 6  | 1.392694  | 2.458883  | -0.799383 |
| 6  | 1.537589  | 3.887609  | -0.593385 |
| 6  | 0.316178  | 4.357865  | -0.180719 |
| 6  | 2.398749  | 1.607069  | -1.228660 |
| 6  | 2.295194  | 0.240606  | -1.435336 |
| 7  | 1.163600  | -0.505366 | -1.214937 |
| 6  | 1.477455  | -1.815316 | -1.515626 |
| 6  | 2.864943  | -1.895691 | -1.939276 |
| 6  | 3.370103  | -0.622715 | -1.892126 |
| 77 | -0.628348 | 0.188820  | -0.538936 |
| 7  | -1.388920 | -1.738841 | -0.608669 |
| 6  | -0.716561 | -2.864432 | -0.990916 |
| 6  | -1.592117 | -4.019123 | -0.873667 |
| 6  | -2.797256 | -3.553258 | -0.412917 |
| 6  | -2.656250 | -2.114353 | -0.251575 |
| 6  | 4.736482  | -0.144193 | -2.275136 |
| 6  | 4.778157  | 0.476560  | -3.682816 |
| 6  | 3.548472  | -3.152474 | -2.386421 |
| 6  | 3.198276  | -3.541044 | -3.834101 |
| 6  | 0.610988  | -2.893226 | -1.410840 |
| 6  | -0.084706 | 5.773196  | 0.108311  |
| 6  | -0.804895 | 6.441663  | -1.076826 |
| 6  | 2.797279  | 4.657677  | -0.850684 |
| 6  | 3.027786  | 4.944326  | -2.345424 |
| 6  | -3.657835 | -1.251098 | 0.178494  |
| 6  | -4.063027 | -4.320449 | -0.175702 |
| 6  | -5.054806 | -4.208768 | -1.347921 |
| 6  | -1.216009 | -5.418331 | -1.257926 |
| 6  | -1.271994 | -5.655379 | -2.777976 |
| 6  | -6.073804 | 0.524514  | 1.016986  |
| 6  | -6.895017 | 0.276265  | -0.261306 |
| 6  | -4.924369 | 3.551455  | 1.025924  |
| 6  | -5.345882 | 4.304994  | -0.248530 |
| 6  | -0.271101 | -0.252049 | 1.481357  |
| 6  | 0.489189  | -1.361200 | 1.829734  |
| 6  | 0.905882  | -1.585550 | 3.155631  |
| 6  | 0.492377  | -0.698792 | 4.181440  |
| 6  | -0.314753 | 0.395065  | 3.838150  |
| 6  | -0.692580 | 0.604619  | 2.517466  |
| 8  | 0.845726  | -0.858713 | 5.468737  |
| 6  | 1.803448  | -2.687961 | 3.500208  |
| 8  | 2.175792  | -2.954817 | 4.646077  |
| 6  | -1.507574 | 0.265376  | -2.544541 |
| 8  | 2.230003  | -3.402031 | 2.439198  |
| 6  | 3.139664  | -4.469633 | 2.737501  |
| 6  | 3.064473  | 1.021704  | 1.901331  |
| 6  | 3.825082  | -0.117137 | 1.533497  |
| 6  | 5.150023  | -0.017767 | 1.217233  |
| 6  | 5.884467  | 1.293007  | 1.251198  |
| 6  | 5.003878  | 2.458714  | 1.603219  |
| 6  | 3.683746  | 2.297307  | 1.916424  |
| 1  | -4.608842 | -1.706764 | 0.429103  |
| 1  | -2.311267 | 4.242736  | 0.498545  |
| 1  | 3.370999  | 2.052233  | -1.397852 |

|   |           |           |           |
|---|-----------|-----------|-----------|
| 1 | 1.015249  | -3.864662 | -1.670272 |
| 1 | -0.928712 | -0.411846 | -3.174333 |
| 1 | -2.554191 | -0.031746 | -2.497213 |
| 1 | -1.403925 | 1.306626  | -2.858905 |
| 1 | -0.206878 | -5.645595 | -0.891973 |
| 1 | -1.885236 | -6.126053 | -0.756999 |
| 1 | -0.600319 | -4.971114 | -3.305519 |
| 1 | -2.283117 | -5.480656 | -3.158139 |
| 1 | 3.283558  | -3.978316 | -1.714087 |
| 1 | 4.632963  | -3.026857 | -2.298224 |
| 1 | 5.442872  | -0.979828 | -2.225433 |
| 1 | 5.084074  | 0.588827  | -1.539116 |
| 1 | -3.823149 | -5.375486 | -0.005035 |
| 1 | -4.545603 | -3.967488 | 0.743894  |
| 1 | 3.651395  | 4.103186  | -0.444497 |
| 1 | 2.761518  | 5.605907  | -0.303381 |
| 1 | -0.983094 | -6.681164 | -3.029026 |
| 1 | 0.804884  | 6.357587  | 0.366307  |
| 1 | -0.733507 | 5.803474  | 0.992276  |
| 1 | -1.093950 | 7.469292  | -0.834036 |
| 1 | -1.707918 | 5.886883  | -1.349478 |
| 1 | -0.155887 | 6.466522  | -1.957492 |
| 1 | 2.205507  | 5.537294  | -2.757672 |
| 1 | 3.081578  | 4.014055  | -2.919080 |
| 1 | 3.960308  | 5.496442  | -2.500619 |
| 1 | 4.091318  | 1.325391  | -3.755488 |
| 1 | 4.476948  | -0.255456 | -4.438523 |
| 1 | 5.785220  | 0.828881  | -3.928520 |
| 1 | 3.703196  | -4.466857 | -4.128377 |
| 1 | 3.499282  | -2.750250 | -4.527941 |
| 1 | 2.119931  | -3.686806 | -3.949976 |
| 1 | -5.972661 | -4.769464 | -1.143551 |
| 1 | -4.610242 | -4.601056 | -2.267682 |
| 1 | -5.324814 | -3.164568 | -1.533202 |
| 1 | -6.586642 | 1.267382  | 1.637255  |
| 1 | -6.041204 | -0.395966 | 1.612729  |
| 1 | -7.903912 | -0.074223 | -0.020749 |
| 1 | -6.413239 | -0.474239 | -0.895522 |
| 1 | -6.981677 | 1.195749  | -0.848303 |
| 1 | -4.295936 | 4.206067  | 1.642866  |
| 1 | -5.813048 | 3.332195  | 1.627303  |
| 1 | -5.867580 | 5.235675  | -0.003005 |
| 1 | -6.012840 | 3.687707  | -0.858119 |
| 1 | -4.474395 | 4.552084  | -0.862626 |
| 1 | 0.817912  | -2.063863 | 1.076720  |
| 1 | -1.302563 | 1.470571  | 2.286940  |
| 1 | -0.623747 | 1.071782  | 4.628175  |
| 1 | 3.380554  | -4.922679 | 1.776038  |
| 1 | 2.672724  | -5.200894 | 3.401641  |
| 1 | 4.041590  | -4.082365 | 3.217328  |
| 1 | 1.409837  | -1.666458 | 5.509021  |
| 1 | 3.082144  | 3.166457  | 2.169673  |
| 1 | 3.332919  | -1.083515 | 1.488801  |
| 1 | 5.458028  | 3.445940  | 1.624807  |
| 1 | 5.712988  | -0.902148 | 0.930920  |
| 1 | 6.387613  | 1.473482  | 0.282014  |
| 1 | 2.012775  | 0.923094  | 2.130739  |
| 1 | 6.731159  | 1.233125  | 1.962737  |

-----  
<sup>3</sup>TS(C-P)

-----

Number of imaginary frequencies : 1 Electronic energy : HF=-2529.9619268  
 Zero-point correction= 1.014650 (Hartree/Particle)  
 Thermal correction to Energy= 1.075011  
 Thermal correction to Enthalpy= 1.075955  
 Thermal correction to Gibbs Free Energy= 0.917561  
 Sum of electronic and zero-point Energies= -2528.947277  
 Sum of electronic and thermal Energies= -2528.886916  
 Sum of electronic and thermal Enthalpies= -2528.885972  
 Sum of electronic and thermal Free Energies= -2529.044365

.....  
 Cartesian Coordinates  
 .....

|    |           |           |           |
|----|-----------|-----------|-----------|
| 6  | -0.300234 | -0.407195 | 4.091418  |
| 6  | -0.761711 | -0.920009 | 2.797913  |
| 6  | -0.417173 | -2.318261 | 2.547047  |
| 6  | 0.561968  | -2.946217 | 3.224634  |
| 6  | 1.324215  | -2.289788 | 4.342979  |
| 6  | 0.685187  | -1.001422 | 4.787380  |
| 6  | 0.336865  | 0.238298  | 1.522299  |
| 6  | 1.670597  | -0.305985 | 1.596610  |
| 6  | 2.758049  | 0.410598  | 2.083525  |
| 6  | 2.588092  | 1.755158  | 2.517411  |
| 6  | 1.283646  | 2.307872  | 2.531293  |
| 6  | 0.222755  | 1.590608  | 2.049104  |
| 77 | -0.585937 | 0.052670  | -0.493933 |
| 6  | -0.976404 | 0.394136  | -2.588774 |
| 6  | 4.110912  | -0.151045 | 2.062332  |
| 8  | 4.162998  | -1.443492 | 1.698531  |
| 6  | 5.474248  | -2.010039 | 1.585615  |
| 8  | 3.611772  | 2.524151  | 2.921913  |
| 7  | 0.154924  | 1.995459  | -0.669177 |
| 6  | 1.451904  | 2.339135  | -0.927447 |
| 6  | 1.584349  | 3.787214  | -0.896186 |
| 6  | 0.334885  | 4.292628  | -0.640675 |
| 6  | -0.554163 | 3.152295  | -0.492009 |
| 6  | 2.860398  | 4.530906  | -1.149778 |
| 6  | 3.199033  | 4.647974  | -2.646777 |
| 6  | 2.482184  | 1.442608  | -1.191914 |
| 6  | 2.390383  | 0.058230  | -1.285672 |
| 7  | 1.244339  | -0.680259 | -1.114619 |
| 6  | 1.571855  | -1.994223 | -1.293823 |
| 6  | 2.989716  | -2.110098 | -1.585569 |
| 6  | 3.499495  | -0.835925 | -1.570537 |
| 6  | -1.897106 | 3.212507  | -0.140420 |
| 6  | -2.746276 | 2.143005  | 0.121977  |
| 7  | -2.401407 | 0.808480  | 0.042565  |
| 6  | -3.525902 | 0.082767  | 0.351496  |
| 6  | -4.616928 | 0.982744  | 0.675382  |
| 6  | -4.135084 | 2.259243  | 0.525441  |
| 6  | -0.093805 | 5.726666  | -0.563474 |
| 6  | -0.781804 | 6.210732  | -1.852609 |
| 6  | 0.678166  | -3.054460 | -1.159288 |
| 6  | -0.652897 | -2.978029 | -0.789253 |
| 7  | -1.329389 | -1.813279 | -0.456060 |
| 6  | -2.612518 | -2.179355 | -0.100723 |
| 6  | -2.751461 | -3.619156 | -0.205628 |
| 6  | -1.543398 | -4.110547 | -0.634857 |
| 6  | 3.701824  | -3.397637 | -1.869793 |

|   |           |           |           |
|---|-----------|-----------|-----------|
| 6 | 3.482636  | -3.897297 | -3.309103 |
| 6 | 4.909540  | -0.392145 | -1.818603 |
| 6 | 5.127723  | 0.156535  | -3.240001 |
| 6 | -3.610168 | -1.304164 | 0.299512  |
| 6 | -4.021678 | -4.370965 | 0.053762  |
| 6 | -5.007436 | -4.298019 | -1.126593 |
| 6 | -1.178445 | -5.529294 | -0.952130 |
| 6 | -1.207926 | -5.828282 | -2.461903 |
| 6 | -6.009637 | 0.546074  | 1.017406  |
| 6 | -6.845551 | 0.188057  | -0.225022 |
| 6 | -4.876998 | 3.554102  | 0.670121  |
| 6 | -5.331397 | 4.135627  | -0.681013 |
| 8 | 5.134704  | 0.484110  | 2.337033  |
| 1 | -4.562262 | -1.744261 | 0.571180  |
| 1 | -2.322360 | 4.202868  | -0.025378 |
| 1 | 3.464760  | 1.871541  | -1.347646 |
| 1 | 1.071826  | -4.047379 | -1.343092 |
| 1 | -0.179722 | -5.752293 | -0.556690 |
| 1 | -1.866286 | -6.206647 | -0.435259 |
| 1 | -0.517360 | -5.174674 | -3.003343 |
| 1 | -2.209307 | -5.658274 | -2.869040 |
| 1 | 3.370286  | -4.168695 | -1.162871 |
| 1 | 4.775189  | -3.266447 | -1.693619 |
| 1 | 5.588980  | -1.235420 | -1.652763 |
| 1 | 5.190761  | 0.372613  | -1.083401 |
| 1 | -3.788146 | -5.419621 | 0.265835  |
| 1 | -4.505397 | -3.979795 | 0.957140  |
| 1 | 3.684854  | 4.034334  | -0.623605 |
| 1 | 2.788671  | 5.534072  | -0.716274 |
| 1 | -0.927240 | -6.867016 | -2.663474 |
| 1 | 0.778245  | 6.356984  | -0.359639 |
| 1 | -0.774165 | 5.867138  | 0.285802  |
| 1 | -1.091505 | 7.257309  | -1.766511 |
| 1 | -1.668114 | 5.607586  | -2.072608 |
| 1 | -0.103895 | 6.121905  | -2.707042 |
| 1 | 2.408918  | 5.185838  | -3.179861 |
| 1 | 3.290292  | 3.659101  | -3.106605 |
| 1 | 4.141486  | 5.184311  | -2.797412 |
| 1 | 4.471887  | 1.010239  | -3.435396 |
| 1 | 4.899938  | -0.610098 | -3.986958 |
| 1 | 6.163549  | 0.480273  | -3.383817 |
| 1 | 4.005662  | -4.843068 | -3.484340 |
| 1 | 3.850115  | -3.161967 | -4.031364 |
| 1 | 2.418194  | -4.051923 | -3.510952 |
| 1 | -5.929799 | -4.843821 | -0.903728 |
| 1 | -4.562183 | -4.729997 | -2.028024 |
| 1 | -5.269230 | -3.260199 | -1.353957 |
| 1 | -6.514838 | 1.342584  | 1.574384  |
| 1 | -5.973184 | -0.318158 | 1.692144  |
| 1 | -7.851823 | -0.138696 | 0.056646  |
| 1 | -6.371758 | -0.615559 | -0.797157 |
| 1 | -6.938661 | 1.052737  | -0.889064 |
| 1 | -4.247687 | 4.288554  | 1.187939  |
| 1 | -5.752568 | 3.401957  | 1.310368  |
| 1 | -5.861279 | 5.083855  | -0.544294 |
| 1 | -6.001057 | 3.439205  | -1.194751 |
| 1 | -4.475008 | 4.313114  | -1.338661 |
| 1 | 1.834135  | -1.324107 | 1.275434  |
| 1 | -0.760751 | 2.049020  | 2.048554  |
| 1 | 1.167008  | 3.323608  | 2.895059  |



|   |           |           |           |
|---|-----------|-----------|-----------|
| 1 | 5.318854  | -3.031123 | 1.238655  |
| 1 | 5.983199  | -2.003710 | 2.552456  |
| 1 | 6.073824  | -1.447610 | 0.866326  |
| 1 | 4.430104  | 1.981501  | 2.812770  |
| 1 | -0.050311 | 0.666613  | -3.094628 |
| 1 | -1.366540 | -0.549426 | -2.980508 |
| 1 | -1.715973 | 1.192488  | -2.672583 |
| 1 | -0.726553 | 0.524720  | 4.451890  |
| 1 | -0.953176 | -2.851350 | 1.773815  |
| 1 | 1.040548  | -0.559626 | 5.715114  |
| 1 | 0.811144  | -3.977809 | 2.986131  |
| 1 | 2.367052  | -2.106109 | 4.030340  |
| 1 | 1.412513  | -2.981697 | 5.196733  |
| 1 | -1.748908 | -0.603014 | 2.475147  |

-----  
**3P**  
 -----

Number of imaginary frequencies : 0 Electronic energy : HF=-2530.027377  
 Zero-point correction= 1.016684 (Hartree/Particle)  
 Thermal correction to Energy= 1.077523  
 Thermal correction to Enthalpy= 1.078467  
 Thermal correction to Gibbs Free Energy= 0.917766  
 Sum of electronic and zero-point Energies= -2529.010693  
 Sum of electronic and thermal Energies= -2528.949854  
 Sum of electronic and thermal Enthalpies= -2528.948910  
 Sum of electronic and thermal Free Energies= -2529.109611

-----  
 Cartesian Coordinates  
 -----

|    |           |           |           |
|----|-----------|-----------|-----------|
| 6  | -2.334266 | 1.251403  | 4.130940  |
| 6  | -1.895593 | 0.754640  | 2.769105  |
| 6  | -2.221659 | -0.702513 | 2.575958  |
| 6  | -2.831137 | -1.461388 | 3.487453  |
| 6  | -3.271482 | -0.958445 | 4.833568  |
| 6  | -2.938190 | 0.492094  | 5.045584  |
| 6  | -0.412634 | 1.061063  | 2.559621  |
| 6  | 0.562225  | 0.070749  | 2.577496  |
| 6  | 1.933083  | 0.388211  | 2.495720  |
| 6  | 2.333836  | 1.739885  | 2.395351  |
| 6  | 1.348970  | 2.739458  | 2.366560  |
| 6  | 0.010658  | 2.400804  | 2.440204  |
| 77 | -0.152272 | -0.044042 | -0.695931 |
| 6  | -0.222352 | -0.199989 | -2.751061 |
| 6  | 2.968093  | -0.646522 | 2.546554  |
| 8  | 2.490244  | -1.893455 | 2.663071  |
| 6  | 3.471150  | -2.933124 | 2.777165  |
| 8  | 3.623835  | 2.111384  | 2.322476  |
| 7  | 0.993203  | 1.668215  | -0.745209 |
| 6  | 2.371610  | 1.731987  | -0.758698 |
| 6  | 2.792828  | 3.129381  | -0.793245 |
| 6  | 1.658720  | 3.887148  | -0.804788 |
| 6  | 0.526787  | 2.965608  | -0.766598 |
| 6  | 4.221795  | 3.575973  | -0.815651 |
| 6  | 4.878088  | 3.420957  | -2.198913 |
| 6  | 3.215540  | 0.653470  | -0.702648 |
| 6  | 2.835459  | -0.697845 | -0.631442 |
| 7  | 1.515093  | -1.162029 | -0.600395 |
| 6  | 1.587207  | -2.559595 | -0.553015 |
| 6  | 2.939216  | -2.964213 | -0.549302 |

|   |           |           |           |
|---|-----------|-----------|-----------|
| 6 | 3.725418  | -1.791868 | -0.590712 |
| 6 | -0.791500 | 3.335717  | -0.690868 |
| 6 | -1.896735 | 2.469772  | -0.602675 |
| 7 | -1.823758 | 1.072058  | -0.613217 |
| 6 | -3.144953 | 0.606202  | -0.582125 |
| 6 | -4.032048 | 1.701287  | -0.512593 |
| 6 | -3.245721 | 2.874842  | -0.521977 |
| 6 | 1.529384  | 5.378335  | -0.867719 |
| 6 | 1.172798  | 5.885589  | -2.276588 |
| 6 | 0.481257  | -3.427333 | -0.530757 |
| 6 | -0.841504 | -3.062182 | -0.559644 |
| 7 | -1.308530 | -1.764881 | -0.594663 |
| 6 | -2.687068 | -1.829793 | -0.635077 |
| 6 | -3.106989 | -3.226836 | -0.612553 |
| 6 | -1.972630 | -3.984643 | -0.561529 |
| 6 | 3.422360  | -4.381906 | -0.564541 |
| 6 | 3.430216  | -4.991775 | -1.978638 |
| 6 | 5.219443  | -1.691230 | -0.614888 |
| 6 | 5.785642  | -1.443972 | -2.025272 |
| 6 | -3.528353 | -0.746348 | -0.624124 |
| 6 | -4.533441 | -3.679742 | -0.683539 |
| 6 | -5.111521 | -3.601774 | -2.108153 |
| 6 | -1.844695 | -5.477655 | -0.573772 |
| 6 | -1.521096 | -6.032991 | -1.972725 |
| 6 | -5.527007 | 1.608409  | -0.494426 |
| 6 | -6.131582 | 1.414080  | -1.897844 |
| 6 | -3.729403 | 4.292765  | -0.524955 |
| 6 | -3.822588 | 4.889932  | -1.941686 |
| 8 | 4.182224  | -0.413436 | 2.515051  |
| 1 | -4.592815 | -0.944307 | -0.616711 |
| 1 | -1.010351 | 4.396346  | -0.690497 |
| 1 | 4.278690  | 0.855008  | -0.691439 |
| 1 | 0.702325  | -4.486963 | -0.495620 |
| 1 | -1.062411 | -5.787681 | 0.130126  |
| 1 | -2.775400 | -5.928075 | -0.212228 |
| 1 | -0.590277 | -5.604040 | -2.355732 |
| 1 | -2.316522 | -5.779623 | -2.680332 |
| 1 | 2.794484  | -4.998447 | 0.090506  |
| 1 | 4.434597  | -4.430661 | -0.147432 |
| 1 | 5.654600  | -2.613095 | -0.212376 |
| 1 | 5.538495  | -0.889538 | 0.061168  |
| 1 | -4.608926 | -4.709461 | -0.317984 |
| 1 | -5.147241 | -3.070218 | -0.008582 |
| 1 | 4.784056  | 3.007641  | -0.066223 |
| 1 | 4.279256  | 4.624282  | -0.504180 |
| 1 | -1.414768 | -7.122466 | -1.951053 |
| 1 | 2.467657  | 5.840258  | -0.542977 |
| 1 | 0.762697  | 5.712624  | -0.156991 |
| 1 | 1.068129  | 6.975342  | -2.290003 |
| 1 | 0.232783  | 5.445518  | -2.622859 |
| 1 | 1.951381  | 5.606307  | -2.993145 |
| 1 | 4.352871  | 4.025236  | -2.945402 |
| 1 | 4.843945  | 2.380472  | -2.535721 |
| 1 | 5.925366  | 3.739183  | -2.175864 |
| 1 | 5.385281  | -0.517882 | -2.448524 |
| 1 | 5.512539  | -2.259932 | -2.701734 |
| 1 | 6.877658  | -1.367871 | -2.003714 |
| 1 | 3.783108  | -6.028196 | -1.961148 |
| 1 | 4.083718  | -4.417933 | -2.642672 |
| 1 | 2.424922  | -4.976808 | -2.410463 |

|   |           |           |           |
|---|-----------|-----------|-----------|
| 1 | -6.158372 | -3.921672 | -2.127661 |
| 1 | -4.543859 | -4.242982 | -2.789598 |
| 1 | -5.057079 | -2.579800 | -2.494960 |
| 1 | -5.944923 | 2.515859  | -0.044825 |
| 1 | -5.839015 | 0.778859  | 0.151473  |
| 1 | -7.223289 | 1.343957  | -1.851065 |
| 1 | -5.747715 | 0.500555  | -2.362062 |
| 1 | -5.870121 | 2.251005  | -2.552474 |
| 1 | -3.062429 | 4.914579  | 0.084583  |
| 1 | -4.713461 | 4.345656  | -0.046034 |
| 1 | -4.171385 | 5.927422  | -1.911082 |
| 1 | -4.517045 | 4.313512  | -2.560330 |
| 1 | -2.846195 | 4.869085  | -2.435209 |
| 1 | 0.277961  | -0.968078 | 2.690099  |
| 1 | -0.736862 | 3.187677  | 2.400664  |
| 1 | 1.668913  | 3.769497  | 2.264055  |
| 1 | 2.910134  | -3.865797 | 2.736060  |
| 1 | 4.006048  | -2.846283 | 3.726719  |
| 1 | 4.183736  | -2.877431 | 1.954814  |
| 1 | 4.153675  | 1.277339  | 2.364137  |
| 1 | 0.424548  | 0.570613  | -3.171533 |
| 1 | 0.119199  | -1.201074 | -3.015993 |
| 1 | -1.260800 | -0.056490 | -3.051194 |
| 1 | -2.119207 | 2.294365  | 4.353349  |
| 1 | -1.924837 | -1.137589 | 1.630147  |
| 1 | -3.215378 | 0.925989  | 6.004448  |
| 1 | -3.034437 | -2.505813 | 3.258452  |
| 1 | -2.813810 | -1.567531 | 5.629744  |
| 1 | -4.355357 | -1.115453 | 4.958207  |
| 1 | -2.439840 | 1.330280  | 2.003951  |

-----  
**CSSTS(B-C)**  
 -----

Number of imaginary frequencies : 1 Electronic energy : HF=-2529.9387417  
 Zero-point correction= 1.008871 (Hartree/Particle)  
 Thermal correction to Energy= 1.070186  
 Thermal correction to Enthalpy= 1.071131  
 Thermal correction to Gibbs Free Energy= 0.907151  
 Sum of electronic and zero-point Energies= -2528.929871  
 Sum of electronic and thermal Energies= -2528.868555  
 Sum of electronic and thermal Enthalpies= -2528.867611  
 Sum of electronic and thermal Free Energies= -2529.031591

.....  
 Cartesian Coordinates  
 .....

|   |           |           |           |
|---|-----------|-----------|-----------|
| 6 | 0.663742  | 0.108158  | 4.234465  |
| 6 | 0.047088  | -0.548757 | 3.095058  |
| 7 | -0.265711 | 0.385987  | 2.137768  |
| 6 | 0.127775  | 1.614424  | 2.624793  |
| 6 | 0.710899  | 1.447427  | 3.944284  |
| 6 | -0.205376 | -1.909863 | 2.992313  |
| 6 | -0.848504 | -2.558652 | 1.946842  |
| 7 | -1.302821 | -1.950284 | 0.802393  |
| 6 | -1.902820 | -2.925230 | 0.033912  |
| 6 | -1.822541 | -4.201540 | 0.722530  |
| 6 | -1.166334 | -3.975638 | 1.905016  |
| 6 | -2.479581 | -2.725520 | -1.212371 |
| 6 | -2.559696 | -1.527345 | -1.917028 |
| 7 | -2.066204 | -0.331341 | -1.478635 |

|    |           |           |           |
|----|-----------|-----------|-----------|
| 6  | -2.313187 | 0.601133  | -2.450719 |
| 6  | -2.993164 | -0.036092 | -3.568069 |
| 6  | -3.149968 | -1.357430 | -3.234889 |
| 77 | -1.112113 | 0.017683  | 0.327209  |
| 7  | -1.012303 | 2.036543  | -0.124163 |
| 6  | -1.405670 | 2.617836  | -1.301125 |
| 6  | -1.139186 | 4.047285  | -1.244996 |
| 6  | -0.589343 | 4.299703  | -0.014422 |
| 6  | -0.517404 | 3.024276  | 0.679538  |
| 6  | -3.843724 | -2.439446 | -4.006213 |
| 6  | -5.275053 | -2.703961 | -3.504962 |
| 6  | -3.476929 | 0.678472  | -4.793789 |
| 6  | -4.803510 | 1.424732  | -4.562402 |
| 6  | -1.989871 | 1.951330  | -2.371851 |
| 6  | -0.876392 | -4.946711 | 3.009374  |
| 6  | -1.900950 | -4.867463 | 4.155873  |
| 6  | -2.422649 | -5.480510 | 0.221118  |
| 6  | -3.941805 | -5.558217 | 0.458317  |
| 6  | 0.009056  | 2.822180  | 1.952145  |
| 6  | -0.176794 | 5.615178  | 0.573407  |
| 6  | -1.225082 | 6.192306  | 1.541653  |
| 6  | -1.484459 | 5.024123  | -2.328165 |
| 6  | -2.970875 | 5.424916  | -2.315845 |
| 6  | 1.198010  | 2.570406  | 4.809577  |
| 6  | 0.052791  | 3.318582  | 5.515759  |
| 6  | 1.082525  | -0.586982 | 5.494599  |
| 6  | -0.099648 | -0.867558 | 6.440196  |
| 6  | 0.632169  | -0.144237 | -0.755450 |
| 6  | 1.657063  | 0.820501  | -0.619245 |
| 6  | 2.907589  | 0.666697  | -1.202186 |
| 6  | 3.143509  | -0.435996 | -2.093186 |
| 6  | 2.067644  | -1.341236 | -2.314747 |
| 6  | 0.838580  | -1.168033 | -1.713510 |
| 8  | 4.267001  | -0.614722 | -2.731891 |
| 6  | 3.991029  | 1.628887  | -0.881858 |
| 8  | 5.187918  | 1.423774  | -0.962972 |
| 6  | -3.122087 | 0.518316  | 0.979136  |
| 8  | 3.493592  | 2.816979  | -0.448689 |
| 6  | 4.478100  | 3.777562  | -0.055073 |
| 6  | 6.098445  | -1.550079 | -1.214430 |
| 6  | 6.054638  | -2.987643 | -1.440424 |
| 6  | 7.016325  | -3.633735 | -2.131605 |
| 6  | 8.225487  | -2.929521 | -2.675716 |
| 6  | 8.304817  | -1.482827 | -2.281605 |
| 6  | 7.325521  | -0.864106 | -1.588367 |
| 1  | -2.239856 | 2.556321  | -3.235574 |
| 1  | -2.903023 | -3.599183 | -1.694034 |
| 1  | 0.107563  | -2.526046 | 3.826956  |
| 1  | 0.381729  | 3.700125  | 2.466574  |
| 1  | -3.042030 | 1.009741  | 1.953223  |
| 1  | -3.598757 | 1.187831  | 0.262138  |
| 1  | -3.692011 | -0.411683 | 1.058619  |
| 1  | 0.780069  | 5.502126  | 1.098746  |
| 1  | 0.004517  | 6.333320  | -0.233419 |
| 1  | -1.416488 | 5.501415  | 2.368472  |
| 1  | -2.175778 | 6.357483  | 1.025618  |
| 1  | 1.778154  | 3.279855  | 4.206429  |
| 1  | 1.890189  | 2.176624  | 5.561433  |
| 1  | 1.826565  | 0.023207  | 6.017683  |
| 1  | 1.583894  | -1.531277 | 5.249269  |

|   |           |           |           |
|---|-----------|-----------|-----------|
| 1 | -0.867242 | 5.922326  | -2.218701 |
| 1 | -1.229754 | 4.599734  | -3.306913 |
| 1 | 0.129651  | -4.766914 | 3.407933  |
| 1 | -0.864120 | -5.964816 | 2.605757  |
| 1 | -0.891862 | 7.146702  | 1.962097  |
| 1 | -1.936038 | -6.328862 | 0.714072  |
| 1 | -2.216024 | -5.594116 | -0.850310 |
| 1 | -4.353586 | -6.496910 | 0.073878  |
| 1 | -4.457845 | -4.729343 | -0.035703 |
| 1 | -4.168592 | -5.495836 | 1.526974  |
| 1 | -2.907040 | -5.094170 | 3.790191  |
| 1 | -1.927229 | -3.862447 | 4.587918  |
| 1 | -1.656872 | -5.577515 | 4.952595  |
| 1 | -0.855539 | -1.487036 | 5.947954  |
| 1 | -0.584498 | 0.066787  | 6.738994  |
| 1 | 0.233530  | -1.386341 | 7.344828  |
| 1 | 0.437480  | 4.138004  | 6.131464  |
| 1 | -0.510631 | 2.638772  | 6.162107  |
| 1 | -0.649112 | 3.736624  | 4.787786  |
| 1 | -3.196490 | 6.129141  | -3.123149 |
| 1 | -3.235130 | 5.896764  | -1.364518 |
| 1 | -3.613334 | 4.547293  | -2.436492 |
| 1 | -3.605117 | -0.042039 | -5.608740 |
| 1 | -2.714532 | 1.389116  | -5.135535 |
| 1 | -5.126625 | 1.945692  | -5.469464 |
| 1 | -4.702021 | 2.162367  | -3.760484 |
| 1 | -5.592652 | 0.726222  | -4.267837 |
| 1 | -3.262286 | -3.368242 | -3.950351 |
| 1 | -3.876429 | -2.167206 | -5.066589 |
| 1 | -5.753157 | -3.504070 | -4.079307 |
| 1 | -5.887944 | -1.802061 | -3.596090 |
| 1 | -5.272512 | -2.993518 | -2.449612 |
| 1 | 1.501667  | 1.679636  | 0.017635  |
| 1 | 0.045675  | -1.877885 | -1.921441 |
| 1 | 2.260384  | -2.177402 | -2.980440 |
| 1 | 3.918628  | 4.653728  | 0.273814  |
| 1 | 5.128896  | 4.032109  | -0.895570 |
| 1 | 5.096839  | 3.389277  | 0.758677  |
| 1 | 5.171912  | -1.006041 | -2.060188 |
| 1 | 5.196587  | -3.539305 | -1.063527 |
| 1 | 7.403127  | 0.187380  | -1.332749 |
| 1 | 6.937869  | -4.703009 | -2.311935 |
| 1 | 9.195327  | -0.934427 | -2.578625 |
| 1 | 9.143541  | -3.459107 | -2.365440 |
| 1 | 5.581292  | -1.169813 | -0.330797 |
| 1 | 8.239754  | -3.015842 | -3.778482 |

-----  
 cssC  
 -----

Number of imaginary frequencies : 0    Electronic energy :    HF=-2529.9990935  
 Zero-point correction=                    1.015320 (Hartree/Particle)  
 Thermal correction to Energy=            1.076398  
 Thermal correction to Enthalpy=         1.077342  
 Thermal correction to Gibbs Free Energy= 0.917738  
 Sum of electronic and zero-point Energies= -2528.983773  
 Sum of electronic and thermal Energies= -2528.922695  
 Sum of electronic and thermal Enthalpies= -2528.921751  
 Sum of electronic and thermal Free Energies= -2529.081356

.....  
 Cartesian Coordinates  
 .....

|    |           |           |           |
|----|-----------|-----------|-----------|
| 6  | -3.079160 | -2.293189 | 4.031655  |
| 6  | -4.274003 | -1.993953 | 3.452002  |
| 6  | -4.357528 | -1.790233 | 2.044005  |
| 6  | -3.234925 | -1.863574 | 1.226621  |
| 6  | -1.985558 | -2.112388 | 1.782810  |
| 6  | -1.836734 | -2.337804 | 3.232254  |
| 8  | -3.907275 | 1.433547  | 4.220392  |
| 6  | -3.382693 | 1.275531  | 3.111695  |
| 8  | -4.077038 | 1.457043  | 1.974917  |
| 6  | -5.449825 | 1.834519  | 2.139108  |
| 6  | -1.994129 | 0.868969  | 2.908340  |
| 6  | -1.459139 | 0.628750  | 1.627348  |
| 6  | -0.131746 | 0.198915  | 1.392118  |
| 6  | 0.650287  | 0.030143  | 2.560503  |
| 6  | 0.144925  | 0.202412  | 3.845232  |
| 6  | -1.187242 | 0.631267  | 4.043158  |
| 77 | 0.649897  | 0.037880  | -0.566121 |
| 6  | 1.521900  | 0.106478  | -2.532279 |
| 8  | -1.645739 | 0.750949  | 5.299651  |
| 7  | -1.019619 | -0.862253 | -1.346307 |
| 6  | -1.210087 | -2.210097 | -1.518629 |
| 6  | -2.490201 | -2.443754 | -2.167874 |
| 6  | -3.054027 | -1.210603 | -2.386733 |
| 6  | -2.117263 | -0.223941 | -1.873997 |
| 6  | -0.324855 | -3.201834 | -1.107542 |
| 6  | 0.920987  | -3.017079 | -0.519620 |
| 7  | 1.488716  | -1.799373 | -0.236070 |
| 6  | 2.735623  | -2.043601 | 0.283177  |
| 6  | 2.961104  | -3.479724 | 0.358075  |
| 6  | 1.835765  | -4.083401 | -0.138313 |
| 6  | -3.014863 | -3.791786 | -2.561452 |
| 6  | -2.366603 | -4.330953 | -3.849361 |
| 6  | -4.340224 | -0.885906 | -3.085893 |
| 6  | -4.132281 | -0.475312 | -4.554858 |
| 6  | -2.302128 | 1.153062  | -1.915785 |
| 6  | -1.409158 | 2.128726  | -1.487657 |
| 7  | -0.177805 | 1.883173  | -0.941503 |
| 6  | 0.393872  | 3.094631  | -0.658227 |
| 6  | -0.519648 | 4.164731  | -1.035867 |
| 6  | -1.638855 | 3.565074  | -1.550073 |
| 6  | 3.652874  | -1.069078 | 0.658728  |
| 6  | 3.487816  | 0.309319  | 0.578833  |
| 7  | 2.358457  | 0.940686  | 0.130702  |
| 6  | 2.571399  | 2.288491  | 0.240071  |
| 6  | 3.903104  | 2.529366  | 0.778582  |
| 6  | 4.472640  | 1.300918  | 0.987535  |
| 6  | 4.234720  | -4.121194 | 0.820905  |
| 6  | 5.332383  | -4.113607 | -0.258696 |
| 6  | 1.578926  | -5.545142 | -0.351054 |
| 6  | 1.839859  | -5.991750 | -1.801182 |
| 6  | 1.657091  | 3.276154  | -0.107878 |
| 6  | 4.512318  | 3.884731  | 0.975042  |
| 6  | 5.040880  | 4.494242  | -0.336183 |
| 6  | 5.855766  | 0.982187  | 1.469519  |
| 6  | 6.819742  | 0.630253  | 0.321962  |
| 6  | -2.856562 | 4.210101  | -2.140034 |
| 6  | -2.822338 | 4.255137  | -3.678441 |

|   |           |           |           |
|---|-----------|-----------|-----------|
| 6 | -0.212038 | 5.627915  | -0.929362 |
| 6 | 0.685118  | 6.132208  | -2.074448 |
| 1 | 1.968121  | 4.301157  | 0.058429  |
| 1 | 4.598993  | -1.421381 | 1.053388  |
| 1 | -0.631512 | -4.226960 | -1.281318 |
| 1 | -3.237749 | 1.503490  | -2.336265 |
| 1 | -3.756792 | 3.673951  | -1.813129 |
| 1 | -2.954176 | 5.229827  | -1.751446 |
| 1 | -2.736993 | 3.247556  | -4.096600 |
| 1 | -1.957568 | 4.828038  | -4.026592 |
| 1 | -4.859007 | -0.077382 | -2.555031 |
| 1 | -5.008486 | -1.753458 | -3.045110 |
| 1 | -4.100360 | -3.735857 | -2.699904 |
| 1 | -2.849713 | -4.507722 | -1.746083 |
| 1 | -1.147278 | 6.198697  | -0.925713 |
| 1 | 0.274649  | 5.837328  | 0.031351  |
| 1 | 0.542879  | -5.785563 | -0.080024 |
| 1 | 2.212130  | -6.129875 | 0.325457  |
| 1 | -3.728141 | 4.719834  | -4.082157 |
| 1 | 4.034307  | -5.154967 | 1.123828  |
| 1 | 4.605838  | -3.609026 | 1.717549  |
| 1 | 6.254014  | -4.575270 | 0.110875  |
| 1 | 5.562177  | -3.091468 | -0.574035 |
| 1 | 5.003839  | -4.663995 | -1.145522 |
| 1 | 2.882666  | -5.809412 | -2.077578 |
| 1 | 1.212986  | -5.430905 | -2.500913 |
| 1 | 1.631009  | -7.058912 | -1.930714 |
| 1 | -1.281214 | -4.407711 | -3.736085 |
| 1 | -2.561675 | -3.657120 | -4.689077 |
| 1 | -2.757762 | -5.321351 | -4.104567 |
| 1 | -5.084797 | -0.230855 | -5.036594 |
| 1 | -3.660580 | -1.286690 | -5.117334 |
| 1 | -3.476279 | 0.397319  | -4.625228 |
| 1 | 0.904028  | 7.199570  | -1.965009 |
| 1 | 0.197449  | 5.978607  | -3.041967 |
| 1 | 1.633588  | 5.587121  | -2.095539 |
| 1 | 5.332839  | 3.815567  | 1.697666  |
| 1 | 3.774259  | 4.564441  | 1.419014  |
| 1 | 5.469329  | 5.487662  | -0.166646 |
| 1 | 4.238267  | 4.587111  | -1.074050 |
| 1 | 5.814978  | 3.855676  | -0.772643 |
| 1 | 5.820051  | 0.147120  | 2.180743  |
| 1 | 6.254464  | 1.836856  | 2.026967  |
| 1 | 7.818057  | 0.390042  | 0.702657  |
| 1 | 6.910056  | 1.468858  | -0.375164 |
| 1 | 6.452163  | -0.229692 | -0.246130 |
| 1 | -2.105115 | 0.824750  | 0.780036  |
| 1 | 1.686023  | -0.279892 | 2.459483  |
| 1 | 0.751300  | 0.022901  | 4.728343  |
| 1 | -5.841109 | 1.953583  | 1.129205  |
| 1 | -5.529683 | 2.770494  | 2.696396  |
| 1 | -5.999973 | 1.057475  | 2.676439  |
| 1 | -2.587354 | 1.047775  | 5.223156  |
| 1 | -3.324408 | -1.717017 | 0.157254  |
| 1 | -5.174580 | -1.922788 | 4.053320  |
| 1 | -1.117169 | -2.225958 | 1.150595  |
| 1 | -3.004050 | -2.459340 | 5.101511  |
| 1 | -1.234555 | -3.238043 | 3.434150  |
| 1 | -5.325640 | -1.580375 | 1.599680  |
| 1 | -1.150833 | -1.538774 | 3.626762  |

|   |          |           |           |
|---|----------|-----------|-----------|
| 1 | 2.349132 | -0.609833 | -2.612517 |
| 1 | 0.778266 | -0.134877 | -3.302038 |
| 1 | 1.915076 | 1.109010  | -2.738692 |

-----  
**TS(B-E)**  
 -----

Number of imaginary frequencies : 1 Electronic energy : HF=-2529.9503213  
 Zero-point correction= 1.009273 (Hartree/Particle)  
 Thermal correction to Energy= 1.070563  
 Thermal correction to Enthalpy= 1.071508  
 Thermal correction to Gibbs Free Energy= 0.908740  
 Sum of electronic and zero-point Energies= -2528.940844  
 Sum of electronic and thermal Energies= -2528.879554  
 Sum of electronic and thermal Enthalpies= -2528.878609  
 Sum of electronic and thermal Free Energies= -2529.041377

.....  
 Cartesian Coordinates  
 .....

|    |           |           |           |
|----|-----------|-----------|-----------|
| 6  | 0.293262  | -1.457748 | 3.932119  |
| 6  | 1.261183  | -1.281104 | 2.840686  |
| 6  | 2.405198  | -0.411622 | 3.138065  |
| 6  | 2.395253  | 0.425872  | 4.191579  |
| 6  | 1.261602  | 0.478326  | 5.176202  |
| 6  | 0.263592  | -0.628962 | 4.989298  |
| 6  | -2.701318 | 0.492732  | 2.338135  |
| 6  | -1.687197 | -0.204541 | 1.724305  |
| 6  | -0.403633 | 0.358461  | 1.480200  |
| 6  | -0.111667 | 1.630400  | 2.056291  |
| 6  | -1.086777 | 2.348600  | 2.689112  |
| 6  | -2.464454 | 1.870920  | 2.811219  |
| 77 | 0.410387  | -0.046446 | -0.621859 |
| 6  | 0.614331  | 0.013730  | -2.728166 |
| 6  | -4.024166 | -0.144758 | 2.540244  |
| 8  | -4.181862 | -1.240633 | 1.728703  |
| 6  | -5.403342 | -1.953799 | 1.931978  |
| 8  | -3.350034 | 2.608319  | 3.274549  |
| 7  | -0.072620 | -2.028960 | -0.645236 |
| 6  | 0.790634  | -3.081430 | -0.455317 |
| 6  | 0.063061  | -4.335220 | -0.559975 |
| 6  | -1.242123 | -4.015641 | -0.831564 |
| 6  | -1.318489 | -2.565769 | -0.894348 |
| 6  | 0.687249  | -5.693939 | -0.453065 |
| 6  | 1.389979  | -6.130378 | -1.751546 |
| 6  | 2.153227  | -2.957998 | -0.217177 |
| 6  | 2.881856  | -1.777501 | -0.141761 |
| 7  | 2.353441  | -0.510614 | -0.269997 |
| 6  | 3.402396  | 0.380654  | -0.147069 |
| 6  | 4.632512  | -0.350503 | 0.084250  |
| 6  | 4.310280  | -1.686247 | 0.089147  |
| 6  | -2.471256 | -1.837115 | -1.148613 |
| 6  | -2.593636 | -0.452561 | -1.203438 |
| 7  | -1.559997 | 0.429397  | -1.057018 |
| 6  | -2.087584 | 1.692281  | -1.095960 |
| 6  | -3.529650 | 1.610465  | -1.271581 |
| 6  | -3.842214 | 0.277978  | -1.347666 |
| 6  | -2.394229 | -4.940044 | -1.086744 |
| 6  | -2.696767 | -5.118010 | -2.585601 |
| 6  | 3.294376  | 1.761307  | -0.224263 |
| 6  | 2.138522  | 2.496206  | -0.460961 |



|   |           |           |           |
|---|-----------|-----------|-----------|
| 7 | 0.896145  | 1.955091  | -0.657511 |
| 6 | 0.016160  | 2.995524  | -0.810584 |
| 6 | 0.733737  | 4.256787  | -0.715913 |
| 6 | 2.052362  | 3.947198  | -0.502076 |
| 6 | 5.986635  | 0.278690  | 0.219935  |
| 6 | 6.601930  | 0.665756  | -1.137077 |
| 6 | 5.227339  | -2.863309 | 0.232322  |
| 6 | 5.598699  | -3.496820 | -1.120803 |
| 6 | -1.356773 | 2.868441  | -0.983013 |
| 6 | 0.108354  | 5.608121  | -0.886595 |
| 6 | -0.148044 | 5.963502  | -2.362263 |
| 6 | 3.224081  | 4.875210  | -0.389231 |
| 6 | 4.022645  | 4.987005  | -1.700564 |
| 6 | -4.444618 | 2.792277  | -1.378212 |
| 6 | -4.433285 | 3.432852  | -2.777840 |
| 6 | -5.182051 | -0.357303 | -1.557278 |
| 6 | -5.412305 | -0.801517 | -3.012588 |
| 8 | -4.886453 | 0.197672  | 3.319494  |
| 1 | -1.922540 | 3.791181  | -1.032410 |
| 1 | 4.208150  | 2.326465  | -0.082357 |
| 1 | 2.708427  | -3.879014 | -0.083852 |
| 1 | -3.382929 | -2.406557 | -1.282122 |
| 1 | 0.046370  | -0.818205 | -3.149052 |
| 1 | 0.237037  | 0.965910  | -3.101376 |
| 1 | 1.681188  | -0.088698 | -2.943813 |
| 1 | -5.284317 | -1.219155 | -0.888715 |
| 1 | -5.967146 | 0.347330  | -1.263802 |
| 1 | -4.649634 | -1.520400 | -3.328679 |
| 1 | -5.356997 | 0.055104  | -3.691357 |
| 1 | -3.290195 | -4.564100 | -0.577026 |
| 1 | -2.181394 | -5.918099 | -0.642258 |
| 1 | -0.082285 | -6.429095 | -0.194495 |
| 1 | 1.408881  | -5.707882 | 0.373135  |
| 1 | -5.464997 | 2.483082  | -1.129496 |
| 1 | -4.167512 | 3.541141  | -0.626852 |
| 1 | 4.760464  | -3.621445 | 0.873081  |
| 1 | 6.141469  | -2.552419 | 0.749023  |
| 1 | -6.394438 | -1.270404 | -3.131585 |
| 1 | 6.659409  | -0.412897 | 0.738060  |
| 1 | 5.920228  | 1.169903  | 0.856073  |
| 1 | 7.584093  | 1.130883  | -1.005880 |
| 1 | 5.957398  | 1.369899  | -1.671925 |
| 1 | 6.722526  | -0.217440 | -1.771701 |
| 1 | 6.110794  | -2.770409 | -1.759054 |
| 1 | 4.704146  | -3.830986 | -1.655092 |
| 1 | 6.258945  | -4.359084 | -0.983821 |
| 1 | 2.175656  | -5.421051 | -2.029194 |
| 1 | 0.676830  | -6.171619 | -2.580386 |
| 1 | 1.844833  | -7.119853 | -1.640203 |
| 1 | -3.547276 | -5.789926 | -2.738720 |
| 1 | -1.830419 | -5.536886 | -3.106544 |
| 1 | -2.929932 | -4.157410 | -3.054746 |
| 1 | -5.104178 | 4.296720  | -2.820519 |
| 1 | -4.754251 | 2.711168  | -3.535494 |
| 1 | -3.427124 | 3.767791  | -3.049137 |
| 1 | 0.757117  | 6.368405  | -0.438918 |
| 1 | -0.836718 | 5.652212  | -0.331593 |
| 1 | -0.612293 | 6.950464  | -2.454672 |
| 1 | -0.808886 | 5.228795  | -2.832361 |
| 1 | 0.789940  | 5.970682  | -2.926027 |

|   |           |           |           |
|---|-----------|-----------|-----------|
| 1 | 3.890719  | 4.537929  | 0.414333  |
| 1 | 2.873898  | 5.869690  | -0.093170 |
| 1 | 4.876332  | 5.662842  | -1.586739 |
| 1 | 3.387919  | 5.368009  | -2.506361 |
| 1 | 4.399499  | 4.008411  | -2.013925 |
| 1 | -1.881045 | -1.215023 | 1.388063  |
| 1 | 0.891837  | 2.032380  | 1.964968  |
| 1 | -0.894471 | 3.336849  | 3.096715  |
| 1 | -5.366083 | -2.805211 | 1.250434  |
| 1 | -6.266082 | -1.321363 | 1.705673  |
| 1 | -5.489868 | -2.297162 | 2.966512  |
| 1 | 0.591352  | -0.601572 | 1.961436  |
| 1 | 3.245979  | -0.423493 | 2.452736  |
| 1 | -0.455494 | -2.238168 | 3.828909  |
| 1 | 3.238267  | 1.090109  | 4.366847  |
| 1 | -0.500294 | -0.744696 | 5.753680  |
| 1 | 1.654933  | 0.462450  | 6.205103  |
| 1 | 1.480248  | -2.168215 | 2.247262  |
| 1 | 0.742895  | 1.448434  | 5.095523  |

---

**<sup>3</sup>B**

---

Number of imaginary frequencies : 0 Electronic energy : HF=-2529.976666  
Zero-point correction= 1.013757 (Hartree/Particle)  
Thermal correction to Energy= 1.076220  
Thermal correction to Enthalpy= 1.077164  
Thermal correction to Gibbs Free Energy= 0.910434  
Sum of electronic and zero-point Energies= -2528.962909  
Sum of electronic and thermal Energies= -2528.900446  
Sum of electronic and thermal Enthalpies= -2528.899502  
Sum of electronic and thermal Free Energies= -2529.066232

.....  
Cartesian Coordinates  
.....

|    |           |           |           |
|----|-----------|-----------|-----------|
| 6  | 5.322697  | 2.100029  | 1.279106  |
| 6  | 4.078949  | 2.001806  | 1.756389  |
| 6  | 3.402403  | 0.694478  | 2.051961  |
| 6  | 4.238099  | -0.496046 | 1.678970  |
| 6  | 5.480673  | -0.403496 | 1.200373  |
| 6  | 6.192056  | 0.906734  | 0.981507  |
| 6  | 2.514333  | 1.251919  | -1.232325 |
| 6  | 2.256910  | -0.097659 | -1.400957 |
| 7  | 1.036570  | -0.713358 | -1.188780 |
| 6  | 1.209560  | -2.052504 | -1.461491 |
| 6  | 2.582592  | -2.294546 | -1.863986 |
| 6  | 3.229240  | -1.085848 | -1.827747 |
| 77 | -0.656334 | 0.171202  | -0.510036 |
| 6  | -1.403276 | 0.849146  | -2.487768 |
| 6  | 0.222747  | -3.021484 | -1.343038 |
| 6  | -1.089953 | -2.826114 | -0.933531 |
| 7  | -1.626205 | -1.614966 | -0.567343 |
| 6  | -2.932450 | -1.848896 | -0.184933 |
| 6  | -3.232112 | -3.262300 | -0.329331 |
| 6  | -2.092238 | -3.867074 | -0.792768 |
| 6  | 3.124671  | -3.627804 | -2.281473 |
| 6  | 2.747083  | -3.999943 | -3.726739 |
| 6  | 4.644612  | -0.774228 | -2.204403 |
| 6  | 4.770177  | -0.203835 | -3.628224 |
| 6  | -1.879254 | -5.306055 | -1.153033 |

|   |           |           |           |
|---|-----------|-----------|-----------|
| 6 | -1.961678 | -5.559805 | -2.669211 |
| 6 | -4.572310 | -3.880567 | -0.067628 |
| 6 | -5.563178 | -3.664663 | -1.225926 |
| 6 | -3.821038 | -0.885927 | 0.266132  |
| 6 | -3.586507 | 0.480334  | 0.396659  |
| 7 | -2.398162 | 1.096696  | 0.125054  |
| 6 | -2.568843 | 2.438463  | 0.347207  |
| 6 | -3.933757 | 2.687386  | 0.781566  |
| 6 | -4.565341 | 1.469766  | 0.815798  |
| 6 | -4.507775 | 4.043566  | 1.061608  |
| 6 | -4.881652 | 4.808203  | -0.221222 |
| 6 | -1.579869 | 3.406795  | 0.200329  |
| 6 | -0.259338 | 3.213914  | -0.190098 |
| 7 | 0.303192  | 2.003098  | -0.510919 |
| 6 | 1.610332  | 2.233012  | -0.837011 |
| 6 | 1.903665  | 3.652255  | -0.717956 |
| 6 | 0.742019  | 4.261108  | -0.315921 |
| 6 | -5.997709 | 1.170459  | 1.141077  |
| 6 | -6.872058 | 1.006406  | -0.115383 |
| 6 | 3.221277  | 4.280182  | -1.057002 |
| 6 | 3.422509  | 4.461892  | -2.572272 |
| 6 | 0.481863  | 5.722185  | -0.104618 |
| 6 | -0.208526 | 6.384088  | -1.310913 |
| 6 | -0.161576 | -0.025248 | 1.488608  |
| 6 | 0.415336  | -1.260198 | 1.873774  |
| 6 | 0.889156  | -1.481969 | 3.151455  |
| 6 | 0.750662  | -0.453368 | 4.184906  |
| 6 | 0.128021  | 0.788590  | 3.755702  |
| 6 | -0.300630 | 0.988245  | 2.465067  |
| 6 | 1.629210  | -2.736969 | 3.440028  |
| 8 | 1.097211  | -3.792250 | 2.762321  |
| 6 | 1.827835  | -5.016311 | 2.898135  |
| 8 | 1.110463  | -0.620250 | 5.370808  |
| 8 | 2.617602  | -2.834183 | 4.134837  |
| 1 | -4.811817 | -1.233084 | 0.534992  |
| 1 | -1.868635 | 4.426271  | 0.428632  |
| 1 | 3.530636  | 1.577049  | -1.414082 |
| 1 | 0.511259  | -4.038690 | -1.579524 |
| 1 | -0.574353 | 0.647607  | -3.167536 |
| 1 | -2.279775 | 0.234301  | -2.692127 |
| 1 | -1.643428 | 1.908234  | -2.432335 |
| 1 | -0.902981 | -5.640029 | -0.780141 |
| 1 | -2.625069 | -5.923432 | -0.641633 |
| 1 | -1.215478 | -4.967133 | -3.207302 |
| 1 | -2.946152 | -5.277097 | -3.054292 |
| 1 | 2.761826  | -4.405770 | -1.598235 |
| 1 | 4.215028  | -3.622693 | -2.181918 |
| 1 | 5.251294  | -1.681989 | -2.120825 |
| 1 | 5.062882  | -0.066612 | -1.482376 |
| 1 | -4.449310 | -4.954468 | 0.107416  |
| 1 | -4.996854 | -3.470660 | 0.856828  |
| 1 | 4.031490  | 3.667101  | -0.648061 |
| 1 | 3.296754  | 5.255078  | -0.563172 |
| 1 | -1.792630 | -6.616052 | -2.901434 |
| 1 | 1.429118  | 6.233915  | 0.095234  |
| 1 | -0.134290 | 5.865898  | 0.791571  |
| 1 | -0.392162 | 7.447243  | -1.125877 |
| 1 | -1.167806 | 5.903085  | -1.525998 |
| 1 | 0.412640  | 6.293662  | -2.207155 |
| 1 | 2.646389  | 5.108389  | -2.993558 |

|   |           |           |           |
|---|-----------|-----------|-----------|
| 1 | 3.367727  | 3.500532  | -3.092529 |
| 1 | 4.397218  | 4.911292  | -2.787553 |
| 1 | 4.185604  | 0.715281  | -3.734786 |
| 1 | 4.397516  | -0.918465 | -4.368616 |
| 1 | 5.813300  | 0.025381  | -3.868216 |
| 1 | 3.148640  | -4.981324 | -3.998441 |
| 1 | 3.141949  | -3.260864 | -4.430393 |
| 1 | 1.660413  | -4.027429 | -3.853834 |
| 1 | -6.534047 | -4.118529 | -1.003338 |
| 1 | -5.179958 | -4.109538 | -2.149338 |
| 1 | -5.719000 | -2.598013 | -1.414702 |
| 1 | -6.405472 | 1.974841  | 1.762430  |
| 1 | -6.058707 | 0.259235  | 1.748595  |
| 1 | -7.909051 | 0.780409  | 0.152653  |
| 1 | -6.498015 | 0.196792  | -0.749744 |
| 1 | -6.863926 | 1.922832  | -0.713308 |
| 1 | -3.792902 | 4.638072  | 1.643794  |
| 1 | -5.396869 | 3.938880  | 1.692306  |
| 1 | -5.289771 | 5.796368  | 0.013704  |
| 1 | -5.631016 | 4.254889  | -0.795412 |
| 1 | -4.007477 | 4.943016  | -0.865730 |
| 1 | 0.529226  | -2.051329 | 1.144618  |
| 1 | -0.745064 | 1.937889  | 2.191610  |
| 1 | 0.018073  | 1.554050  | 4.517998  |
| 1 | 1.281500  | -5.753501 | 2.309035  |
| 1 | 1.878229  | -5.322924 | 3.945869  |
| 1 | 2.848302  | -4.902853 | 2.521021  |
| 1 | 3.140043  | 0.639152  | 3.119283  |
| 1 | 3.502244  | 2.903983  | 1.949632  |
| 1 | 3.791279  | -1.473207 | 1.839978  |
| 1 | 5.757917  | 3.081832  | 1.100505  |
| 1 | 6.036631  | -1.308012 | 0.961632  |
| 1 | 6.568528  | 0.966586  | -0.053396 |
| 1 | 2.437694  | 0.651677  | 1.532300  |
| 1 | 7.102722  | 0.944911  | 1.601570  |

---

**E**

---

Number of imaginary frequencies : 0 Electronic energy : HF=-2530.0126206  
Zero-point correction= 1.013208 (Hartree/Particle)  
Thermal correction to Energy= 1.075630  
Thermal correction to Enthalpy= 1.076575  
Thermal correction to Gibbs Free Energy= 0.908647  
Sum of electronic and zero-point Energies= -2528.999412  
Sum of electronic and thermal Energies= -2528.936990  
Sum of electronic and thermal Enthalpies= -2528.936046  
Sum of electronic and thermal Free Energies= -2529.103974

---

Cartesian Coordinates

---

|   |          |           |           |
|---|----------|-----------|-----------|
| 6 | 4.082761 | 2.249813  | 0.303295  |
| 6 | 3.252280 | 1.095879  | -0.000272 |
| 7 | 1.950231 | 1.497103  | -0.171806 |
| 6 | 1.917974 | 2.859694  | 0.004015  |
| 6 | 3.255654 | 3.344061  | 0.302873  |
| 6 | 3.703469 | -0.215326 | -0.103299 |
| 6 | 2.947930 | -1.341249 | -0.402810 |
| 7 | 1.586796 | -1.348551 | -0.612981 |
| 6 | 1.227864 | -2.644670 | -0.891224 |

|    |           |           |           |
|----|-----------|-----------|-----------|
| 6  | 2.403825  | -3.497390 | -0.852938 |
| 6  | 3.470671  | -2.689390 | -0.548342 |
| 6  | -0.067953 | -3.073662 | -1.155113 |
| 6  | -1.210274 | -2.289104 | -1.207418 |
| 7  | -1.241001 | -0.925444 | -1.017759 |
| 6  | -2.551587 | -0.533081 | -1.122167 |
| 6  | -3.389687 | -1.688376 | -1.398537 |
| 6  | -2.558412 | -2.777159 | -1.447845 |
| 77 | 0.352850  | 0.287469  | -0.615165 |
| 7  | -0.887106 | 1.906953  | -0.537678 |
| 6  | -2.256295 | 1.888458  | -0.661342 |
| 6  | -2.789503 | 3.221086  | -0.433524 |
| 6  | -1.715655 | 4.042646  | -0.213265 |
| 6  | -0.526457 | 3.208034  | -0.278012 |
| 6  | -2.910410 | -4.205788 | -1.733503 |
| 6  | -2.640707 | -4.606849 | -3.194781 |
| 6  | -4.872469 | -1.625528 | -1.609680 |
| 6  | -5.259139 | -1.077122 | -2.994899 |
| 6  | -3.015626 | 0.762717  | -0.934307 |
| 6  | 4.919546  | -3.060440 | -0.441910 |
| 6  | 5.713388  | -2.733269 | -1.719615 |
| 6  | 2.402938  | -4.966601 | -1.151128 |
| 6  | 2.362673  | -5.269518 | -2.659853 |
| 6  | 0.772619  | 3.643633  | -0.051046 |
| 6  | -1.709754 | 5.519445  | 0.040216  |
| 6  | -1.359674 | 6.338188  | -1.215258 |
| 6  | -4.249519 | 3.555176  | -0.426795 |
| 6  | -4.847230 | 3.690491  | -1.838134 |
| 6  | 3.617051  | 4.785673  | 0.499946  |
| 6  | 3.734827  | 5.556279  | -0.827487 |
| 6  | 5.568820  | 2.205243  | 0.496873  |
| 6  | 6.340345  | 2.139293  | -0.833794 |
| 6  | 0.743489  | 0.575101  | -2.616207 |
| 6  | 0.382409  | 0.290055  | 2.254645  |
| 6  | -0.804772 | -0.440149 | 2.045184  |
| 6  | -2.054828 | 0.153059  | 2.174006  |
| 6  | -2.144311 | 1.575629  | 2.518767  |
| 6  | -0.885399 | 2.267896  | 2.773931  |
| 6  | 0.329277  | 1.644771  | 2.654710  |
| 6  | -3.285006 | -0.657223 | 1.963386  |
| 8  | -4.413838 | -0.244352 | 1.795762  |
| 8  | -3.221891 | 2.204274  | 2.610519  |
| 8  | -2.989081 | -1.984921 | 1.989913  |
| 6  | -4.100761 | -2.866024 | 1.820347  |
| 6  | 0.811275  | -2.184814 | 4.738365  |
| 6  | 1.870755  | -2.385492 | 3.693659  |
| 6  | 1.667508  | -3.168398 | 2.593065  |
| 6  | 0.442325  | -3.856335 | 2.392066  |
| 6  | -0.593816 | -3.734499 | 3.351676  |
| 6  | -0.448988 | -2.951994 | 4.462172  |
| 1  | 0.901377  | 4.703397  | 0.136643  |
| 1  | 4.763635  | -0.374706 | 0.056970  |
| 1  | -0.200570 | -4.135262 | -1.329542 |
| 1  | -4.088293 | 0.901498  | -0.970514 |
| 1  | 0.131340  | -0.119689 | -3.196651 |
| 1  | 0.494889  | 1.606692  | -2.876899 |
| 1  | 1.804372  | 0.385928  | -2.798361 |
| 1  | -4.784398 | 2.785712  | 0.141418  |
| 1  | -4.401400 | 4.490438  | 0.121536  |
| 1  | -4.726101 | 2.765339  | -2.410406 |

|   |           |           |           |
|---|-----------|-----------|-----------|
| 1 | -4.346943 | 4.488296  | -2.396540 |
| 1 | -5.324201 | -1.005739 | -0.825591 |
| 1 | -5.299068 | -2.627985 | -1.491442 |
| 1 | -3.968130 | -4.373153 | -1.502733 |
| 1 | -2.346225 | -4.867893 | -1.064501 |
| 1 | -2.693172 | 5.826220  | 0.410824  |
| 1 | -0.997348 | 5.757561  | 0.840245  |
| 1 | 1.544668  | -5.445615 | -0.663146 |
| 1 | 3.294128  | -5.428450 | -0.712864 |
| 1 | -5.915822 | 3.923539  | -1.791294 |
| 1 | 5.007420  | -4.130809 | -0.226535 |
| 1 | 5.375139  | -2.542123 | 0.411076  |
| 1 | 6.768406  | -3.004227 | -1.609725 |
| 1 | 5.655461  | -1.665666 | -1.952573 |
| 1 | 5.305939  | -3.279170 | -2.575974 |
| 1 | 3.236895  | -4.843452 | -3.161487 |
| 1 | 1.472700  | -4.832150 | -3.122421 |
| 1 | 2.351754  | -6.348329 | -2.845828 |
| 1 | -1.586407 | -4.463639 | -3.450883 |
| 1 | -3.231776 | -3.988843 | -3.877474 |
| 1 | -2.897327 | -5.656462 | -3.371344 |
| 1 | -6.346764 | -1.036148 | -3.111389 |
| 1 | -4.851618 | -1.710927 | -3.788754 |
| 1 | -4.861516 | -0.068608 | -3.142242 |
| 1 | -1.355454 | 7.411566  | -0.999330 |
| 1 | -2.087378 | 6.150591  | -2.010723 |
| 1 | -0.373032 | 6.062602  | -1.600975 |
| 1 | 4.566169  | 4.853322  | 1.042557  |
| 1 | 2.868660  | 5.274230  | 1.136528  |
| 1 | 3.990172  | 6.606503  | -0.653140 |
| 1 | 2.793948  | 5.519782  | -1.384868 |
| 1 | 4.509965  | 5.114819  | -1.461319 |
| 1 | 5.838806  | 1.340296  | 1.115553  |
| 1 | 5.890895  | 3.089703  | 1.057105  |
| 1 | 7.420836  | 2.096211  | -0.662495 |
| 1 | 6.124758  | 3.018925  | -1.447880 |
| 1 | 6.049013  | 1.256411  | -1.411005 |
| 1 | -0.734549 | -1.488859 | 1.794714  |
| 1 | 1.252748  | 2.187785  | 2.825441  |
| 1 | -0.974388 | 3.313379  | 3.047851  |
| 1 | -3.674879 | -3.868915 | 1.787530  |
| 1 | -4.632555 | -2.649825 | 0.894047  |
| 1 | -4.796381 | -2.772040 | 2.659125  |
| 1 | 1.332224  | -0.223608 | 2.178240  |
| 1 | 2.448576  | -3.264257 | 1.846416  |
| 1 | -1.529965 | -4.260088 | 3.187899  |
| 1 | 2.817813  | -1.869778 | 3.829642  |
| 1 | -1.263442 | -2.856469 | 5.174390  |
| 1 | 1.205673  | -2.446456 | 5.738064  |
| 1 | 0.298489  | -4.457562 | 1.502314  |
| 1 | 0.578161  | -1.106624 | 4.830323  |

-----  
**CSSB<sub>Ru</sub>**  
 -----

Number of imaginary frequencies : 0 Electronic energy : HF=-6014.9231141  
 Zero-point correction= 0.583384 (Hartree/Particle)  
 Thermal correction to Energy= 0.639857  
 Thermal correction to Enthalpy= 0.640801  
 Thermal correction to Gibbs Free Energy= 0.483109

|                                              |              |
|----------------------------------------------|--------------|
| Sum of electronic and zero-point Energies=   | -6014.339730 |
| Sum of electronic and thermal Energies=      | -6014.283258 |
| Sum of electronic and thermal Enthalpies=    | -6014.282313 |
| Sum of electronic and thermal Free Energies= | -6014.440005 |

.....  
 Cartesian Coordinates  
 .....

|    |           |           |           |
|----|-----------|-----------|-----------|
| 6  | -5.482116 | -5.493821 | -0.671956 |
| 6  | -4.953875 | -5.180155 | -1.922154 |
| 6  | -3.976872 | -4.190325 | -2.016904 |
| 6  | -3.502467 | -3.497340 | -0.892563 |
| 6  | -4.064714 | -3.842037 | 0.348596  |
| 6  | -5.043203 | -4.827239 | 0.469906  |
| 6  | -2.453672 | -2.438562 | -0.992421 |
| 6  | -2.905710 | -1.111674 | -1.022127 |
| 7  | -2.099236 | -0.000125 | -0.980803 |
| 6  | -2.905930 | 1.111249  | -1.022057 |
| 6  | -4.289678 | 0.680975  | -1.083669 |
| 6  | -4.289544 | -0.681666 | -1.083694 |
| 6  | -2.454149 | 2.438234  | -0.992259 |
| 6  | -3.503146 | 3.496799  | -0.892365 |
| 6  | -4.065568 | 3.841269  | 0.348775  |
| 6  | -5.044252 | 4.826279  | 0.470103  |
| 6  | -5.483176 | 5.492915  | -0.671721 |
| 6  | -4.954761 | 5.179476  | -1.921903 |
| 6  | -3.977588 | 4.189818  | -2.016672 |
| 44 | -0.000003 | 0.000044  | -0.773546 |
| 7  | 0.000227  | -2.059065 | -1.053387 |
| 6  | 1.118077  | -2.871705 | -1.012514 |
| 6  | 0.683813  | -4.245463 | -0.964692 |
| 6  | -0.682935 | -4.245595 | -0.964730 |
| 6  | -1.117459 | -2.871926 | -1.012535 |
| 6  | 2.454217  | -2.438116 | -0.992346 |
| 6  | 3.503198  | -3.496706 | -0.892419 |
| 6  | 4.065389  | -3.841328 | 0.348790  |
| 6  | 5.044038  | -4.826364 | 0.470177  |
| 6  | 5.483173  | -5.492849 | -0.671656 |
| 6  | 4.955000  | -5.179245 | -1.921898 |
| 6  | 3.977840  | -4.189579 | -2.016724 |
| 17 | 3.531251  | -3.013942 | 1.797748  |
| 17 | 3.334976  | -3.801396 | -3.600543 |
| 17 | -3.531668 | 3.013727  | 1.797732  |
| 17 | -3.334474 | 3.801833  | -3.600445 |
| 17 | -3.333941 | -3.802070 | -3.600680 |
| 17 | -3.530815 | -3.014544 | 1.797581  |
| 6  | 2.906022  | -1.111145 | -1.022036 |
| 7  | 2.099335  | 0.000233  | -0.980825 |
| 6  | 2.905803  | 1.111771  | -1.021953 |
| 6  | 4.289654  | 0.681773  | -1.083350 |
| 6  | 4.289786  | -0.680869 | -1.083405 |
| 6  | 2.453745  | 2.438651  | -0.992197 |
| 6  | 3.502521  | 3.497442  | -0.892243 |
| 6  | 4.064578  | 3.842228  | 0.348972  |
| 6  | 5.043046  | 4.827447  | 0.470352  |
| 6  | 5.482116  | 5.493952  | -0.671493 |
| 6  | 4.954057  | 5.180196  | -1.921747 |
| 6  | 3.977080  | 4.190348  | -2.016568 |
| 17 | 3.530482  | 3.014805  | 1.797914  |
| 17 | 3.334356  | 3.801987  | -3.600402 |
| 6  | 1.117526  | 2.872009  | -1.012327 |

|    |           |           |           |
|----|-----------|-----------|-----------|
| 7  | -0.000175 | 2.059165  | -1.053214 |
| 6  | -1.118011 | 2.871826  | -1.012334 |
| 6  | -0.683729 | 4.245571  | -0.964467 |
| 6  | 0.683019  | 4.245683  | -0.964437 |
| 6  | -0.000035 | -0.000036 | 1.135099  |
| 6  | 1.241359  | -0.000032 | 1.908639  |
| 6  | 1.232814  | -0.000128 | 3.258713  |
| 6  | -0.000102 | -0.000257 | 4.083514  |
| 6  | -1.232985 | -0.000214 | 3.258669  |
| 6  | -1.241478 | -0.000065 | 1.908599  |
| 35 | 2.918235  | -0.000103 | 4.241784  |
| 35 | -2.918448 | -0.000374 | 4.241674  |
| 8  | -0.000118 | -0.000415 | 5.302981  |
| 1  | 2.182085  | 0.000041  | 1.379635  |
| 1  | -2.182195 | 0.000007  | 1.379576  |
| 1  | 5.447915  | 5.062778  | 1.447351  |
| 1  | 5.291204  | 5.688935  | -2.816901 |
| 1  | 6.243179  | 6.262823  | -0.586554 |
| 1  | 5.448992  | -5.061568 | 1.447171  |
| 1  | 5.292190  | -5.687977 | -2.817040 |
| 1  | 6.244378  | -6.261580 | -0.586726 |
| 1  | -5.449393 | 5.061344  | 1.447053  |
| 1  | -5.291773 | 5.688321  | -2.817048 |
| 1  | -6.244399 | 6.261632  | -0.586828 |
| 1  | -5.290893 | -5.688960 | -2.817319 |
| 1  | -5.448209 | -5.062498 | 1.446865  |
| 1  | -6.243199 | -6.262678 | -0.587077 |
| 1  | 5.141279  | -1.343133 | -1.137270 |
| 1  | 5.141015  | 1.344209  | -1.137161 |
| 1  | 1.342086  | 5.100663  | -0.933646 |
| 1  | -1.342939 | 5.100443  | -0.933705 |
| 1  | -5.141164 | 1.343241  | -1.137600 |
| 1  | -5.140900 | -1.344096 | -1.137667 |
| 1  | 1.343034  | -5.100325 | -0.933943 |
| 1  | -1.341991 | -5.100586 | -0.933989 |

---

CSS TS(B-D)<sub>Ru</sub>

---

Number of imaginary frequencies : 1 Electronic energy : HF=-6248.3637232  
Zero-point correction= 0.702127 (Hartree/Particle)  
Thermal correction to Energy= 0.764388  
Thermal correction to Enthalpy= 0.765332  
Thermal correction to Gibbs Free Energy= 0.597374  
Sum of electronic and zero-point Energies= -6247.661596  
Sum of electronic and thermal Energies= -6247.599335  
Sum of electronic and thermal Enthalpies= -6247.598391  
Sum of electronic and thermal Free Energies= -6247.766349

.....  
Cartesian Coordinates  
.....

|   |           |           |           |
|---|-----------|-----------|-----------|
| 6 | -6.686664 | -3.712508 | -1.602929 |
| 6 | -6.072827 | -3.138643 | -2.713704 |
| 6 | -4.894413 | -2.413961 | -2.541676 |
| 6 | -4.296190 | -2.240960 | -1.282171 |
| 6 | -4.952004 | -2.834750 | -0.192717 |
| 6 | -6.131172 | -3.563976 | -0.334388 |
| 6 | -3.032654 | -1.458563 | -1.119419 |
| 6 | -3.181031 | -0.095395 | -0.805140 |
| 7 | -2.149379 | 0.803044  | -0.627994 |



|    |           |           |           |
|----|-----------|-----------|-----------|
| 6  | -2.702918 | 2.048400  | -0.416341 |
| 6  | -4.145142 | 1.922627  | -0.434488 |
| 6  | -4.437525 | 0.607843  | -0.663247 |
| 6  | -1.984549 | 3.246037  | -0.248036 |
| 6  | -2.792493 | 4.506658  | -0.219913 |
| 6  | -3.278483 | 5.094156  | 0.957134  |
| 6  | -4.027671 | 6.270051  | 0.958642  |
| 6  | -4.311073 | 6.894442  | -0.252767 |
| 6  | -3.851827 | 6.349315  | -1.449240 |
| 6  | -3.105323 | 5.172957  | -1.419744 |
| 44 | -0.109341 | 0.364131  | -0.731991 |
| 7  | -0.571002 | -1.598379 | -1.283031 |
| 6  | 0.343272  | -2.594829 | -1.534055 |
| 6  | -0.373778 | -3.833741 | -1.764890 |
| 6  | -1.704752 | -3.562354 | -1.648704 |
| 6  | -1.831429 | -2.151736 | -1.341336 |
| 6  | 1.739037  | -2.432024 | -1.568430 |
| 6  | 2.543296  | -3.653987 | -1.878597 |
| 6  | 3.030506  | -4.499338 | -0.868235 |
| 6  | 3.780778  | -5.639740 | -1.154907 |
| 6  | 4.059573  | -5.957206 | -2.481681 |
| 6  | 3.595629  | -5.145879 | -3.514643 |
| 6  | 2.848436  | -4.011820 | -3.201880 |
| 17 | 2.698891  | -4.129348 | 0.808009  |
| 17 | 2.276857  | -3.005421 | -4.519266 |
| 17 | -2.948237 | 4.337833  | 2.506130  |
| 17 | -2.545377 | 4.514655  | -2.942707 |
| 17 | -4.149726 | -1.693834 | -3.953874 |
| 17 | -4.267916 | -2.671034 | 1.414159  |
| 6  | 2.459394  | -1.239876 | -1.384182 |
| 7  | 1.910694  | -0.007694 | -1.111767 |
| 6  | 2.938661  | 0.903694  | -1.010418 |
| 6  | 4.193655  | 0.213450  | -1.231994 |
| 6  | 3.900417  | -1.098047 | -1.459674 |
| 6  | 2.787454  | 2.271519  | -0.726007 |
| 6  | 4.032619  | 3.098614  | -0.729160 |
| 6  | 4.696881  | 3.453635  | 0.455703  |
| 6  | 5.856738  | 4.226792  | 0.459837  |
| 6  | 6.381609  | 4.668837  | -0.751944 |
| 6  | 5.753612  | 4.345901  | -1.952424 |
| 6  | 4.593991  | 3.572896  | -1.927042 |
| 17 | 4.066904  | 2.905421  | 1.997002  |
| 17 | 3.815188  | 3.199870  | -3.451588 |
| 6  | 1.584817  | 2.958507  | -0.480684 |
| 7  | 0.329894  | 2.389255  | -0.447057 |
| 6  | -0.587900 | 3.401110  | -0.255989 |
| 6  | 0.124761  | 4.656826  | -0.133606 |
| 6  | 1.454504  | 4.385487  | -0.267210 |
| 6  | 0.095671  | -0.168524 | 1.200192  |
| 6  | 1.431971  | 0.034940  | 1.799222  |
| 6  | 2.001620  | -0.896290 | 2.581886  |
| 6  | 1.330704  | -2.153173 | 2.995848  |
| 6  | -0.042599 | -2.282413 | 2.447417  |
| 6  | -0.620904 | -1.380119 | 1.638351  |
| 35 | 3.818530  | -0.653286 | 3.261869  |
| 35 | -1.006077 | -3.904769 | 2.964915  |
| 8  | 1.843133  | -2.984325 | 3.725333  |
| 1  | 1.956944  | 0.951140  | 1.558992  |
| 1  | -1.633390 | -1.523054 | 1.285995  |
| 1  | -0.605672 | 0.732215  | 1.801535  |

|   |           |           |           |
|---|-----------|-----------|-----------|
| 1 | 6.335257  | 4.470647  | 1.400755  |
| 1 | 6.148847  | 4.687722  | -2.901510 |
| 1 | 7.285027  | 5.269969  | -0.760707 |
| 1 | 4.136223  | -6.262548 | -0.342702 |
| 1 | 3.805825  | -5.381113 | -4.551135 |
| 1 | 4.642686  | -6.842825 | -2.712855 |
| 1 | -4.377951 | 6.681498  | 1.897649  |
| 1 | -4.065271 | 6.823805  | -2.399559 |
| 1 | -4.892918 | 7.810302  | -0.264617 |
| 1 | -6.496174 | -3.245241 | -3.705289 |
| 1 | -6.597341 | -4.006649 | 0.537690  |
| 1 | -7.603830 | -4.279165 | -1.726533 |
| 1 | 4.590996  | -1.903441 | -1.662378 |
| 1 | 5.167997  | 0.679188  | -1.214350 |
| 1 | 2.276861  | 5.085257  | -0.241042 |
| 1 | -0.339870 | 5.619653  | 0.022409  |
| 1 | -4.839840 | 2.738805  | -0.298062 |
| 1 | -5.414444 | 0.155198  | -0.750966 |
| 1 | 0.089336  | -4.783446 | -1.989133 |
| 1 | -2.531223 | -4.248793 | -1.760594 |
| 6 | -1.248572 | 1.356759  | 2.916038  |
| 6 | -2.605144 | 0.837286  | 2.821224  |
| 6 | -3.040648 | -0.128798 | 3.654693  |
| 6 | -2.192659 | -0.696854 | 4.746687  |
| 6 | -0.859288 | -0.035707 | 4.883452  |
| 6 | -0.449805 | 0.952401  | 4.059261  |
| 1 | -3.247757 | 1.222787  | 2.038790  |
| 1 | -4.048532 | -0.519064 | 3.548490  |
| 1 | -2.731381 | -0.644328 | 5.707447  |
| 1 | -0.223303 | -0.357070 | 5.703658  |
| 1 | 0.517079  | 1.421538  | 4.206966  |
| 1 | -1.062326 | 2.339917  | 2.488392  |
| 1 | -2.054181 | -1.779701 | 4.583576  |

---

<sup>OSS</sup>TS(B-C)<sub>Ru</sub>

---

Number of imaginary frequencies : 1 Electronic energy : HF=-6248.3554578  
 Zero-point correction= 0.699774 (Hartree/Particle)  
 Thermal correction to Energy= 0.762845  
 Thermal correction to Enthalpy= 0.763789  
 Thermal correction to Gibbs Free Energy= 0.588996  
 Sum of electronic and zero-point Energies= -6247.655684  
 Sum of electronic and thermal Energies= -6247.592613  
 Sum of electronic and thermal Enthalpies= -6247.591669  
 Sum of electronic and thermal Free Energies= -6247.766462

---

Cartesian Coordinates

---

|   |          |           |           |
|---|----------|-----------|-----------|
| 6 | 6.020678 | 0.670289  | -2.556032 |
| 6 | 5.282338 | -0.590320 | -2.624454 |
| 6 | 5.932799 | -1.692646 | -3.329816 |
| 6 | 7.057611 | -1.511521 | -4.050622 |
| 6 | 7.752068 | -0.184669 | -4.141685 |
| 6 | 7.146068 | 0.874604  | -3.268711 |
| 8 | 3.060779 | -0.085709 | -3.795958 |
| 6 | 2.162007 | -0.052261 | -2.863325 |
| 6 | 1.748480 | 1.158076  | -2.229971 |
| 6 | 0.806706 | 1.211274  | -1.229745 |
| 6 | 0.213241 | 0.014241  | -0.739535 |

|    |           |           |           |
|----|-----------|-----------|-----------|
| 6  | 0.586664  | -1.215702 | -1.350878 |
| 6  | 1.525942  | -1.226411 | -2.356166 |
| 44 | -0.998548 | 0.044833  | 0.849104  |
| 7  | -2.457388 | 1.263850  | 0.029171  |
| 6  | -3.506624 | 0.838130  | -0.758858 |
| 6  | -4.206952 | 1.997352  | -1.256595 |
| 6  | -3.577722 | 3.103960  | -0.757791 |
| 6  | -2.472068 | 2.645921  | 0.046761  |
| 6  | -3.849089 | -0.500590 | -1.016381 |
| 6  | -3.227067 | -1.643315 | -0.492592 |
| 7  | -2.109556 | -1.643161 | 0.306431  |
| 6  | -1.839755 | -2.947045 | 0.658655  |
| 6  | -2.830800 | -3.809536 | 0.045553  |
| 6  | -3.675322 | -3.011948 | -0.666574 |
| 6  | -0.766138 | -3.365028 | 1.458767  |
| 6  | 0.219017  | -2.545759 | 2.037447  |
| 7  | 0.263371  | -1.167768 | 1.967825  |
| 6  | 1.418260  | -0.747169 | 2.593196  |
| 6  | 2.123042  | -1.906815 | 3.084251  |
| 6  | 1.379985  | -3.007529 | 2.758175  |
| 6  | 1.833755  | 0.588359  | 2.732331  |
| 6  | 1.125513  | 1.735393  | 2.344422  |
| 6  | 1.510778  | 3.107224  | 2.614769  |
| 6  | 0.547406  | 3.911492  | 2.083059  |
| 6  | -0.434656 | 3.048362  | 1.456568  |
| 7  | -0.057327 | 1.738853  | 1.646817  |
| 6  | -1.550774 | 3.468623  | 0.717211  |
| 1  | 0.540983  | 2.166082  | -0.799871 |
| 1  | 0.154403  | -2.146026 | -1.008561 |
| 1  | 4.217752  | -0.328168 | -3.314913 |
| 1  | 5.452531  | -2.666156 | -3.294975 |
| 1  | 5.609213  | 1.466515  | -1.942860 |
| 1  | 7.499924  | -2.343784 | -4.592266 |
| 1  | 7.654405  | 1.834429  | -3.224223 |
| 1  | 8.822922  | -0.302795 | -3.904206 |
| 1  | 4.731211  | -0.865960 | -1.718247 |
| 1  | 7.755241  | 0.159334  | -5.191889 |
| 6  | -0.653060 | -4.832873 | 1.718447  |
| 6  | 0.062257  | -5.685156 | 0.861981  |
| 6  | -1.261255 | -5.426699 | 2.835958  |
| 6  | 0.170613  | -7.054877 | 1.098185  |
| 6  | -1.168898 | -6.793172 | 3.095076  |
| 6  | -0.449108 | -7.602446 | 2.218997  |
| 1  | 0.733100  | -7.674200 | 0.409694  |
| 1  | -1.655652 | -7.207402 | 3.969884  |
| 1  | -0.370965 | -8.667622 | 2.411374  |
| 6  | 3.195731  | 0.808402  | 3.303762  |
| 6  | 4.308389  | 0.941353  | 2.454780  |
| 6  | 3.439764  | 0.892586  | 4.682302  |
| 6  | 5.596828  | 1.142688  | 2.945031  |
| 6  | 4.719067  | 1.093417  | 5.199694  |
| 6  | 5.794029  | 1.216818  | 4.322542  |
| 1  | 6.425609  | 1.238358  | 2.253750  |
| 1  | 4.860943  | 1.152407  | 6.272193  |
| 1  | 6.793481  | 1.373211  | 4.715324  |
| 6  | -1.774729 | 4.942963  | 0.615424  |
| 6  | -2.632331 | 5.617051  | 1.499512  |
| 6  | -1.142945 | 5.721912  | -0.367976 |
| 6  | -2.858739 | 6.989840  | 1.415761  |
| 6  | -1.351608 | 7.096429  | -0.472876 |

|    |           |           |           |
|----|-----------|-----------|-----------|
| 6  | -2.213349 | 7.724104  | 0.423457  |
| 1  | -3.529336 | 7.466959  | 2.120353  |
| 1  | -0.843311 | 7.657266  | -1.248135 |
| 1  | -2.382500 | 8.793472  | 0.349042  |
| 6  | -5.002562 | -0.730741 | -1.937321 |
| 6  | -4.802684 | -0.911439 | -3.315989 |
| 6  | -6.328019 | -0.780631 | -1.478947 |
| 6  | -5.860941 | -1.128965 | -4.196799 |
| 6  | -7.404383 | -0.996360 | -2.338227 |
| 6  | -7.161388 | -1.169715 | -3.698918 |
| 1  | -5.660382 | -1.262649 | -5.253089 |
| 1  | -8.411397 | -1.027583 | -1.939756 |
| 1  | -7.992087 | -1.338369 | -4.376549 |
| 17 | -3.174868 | -0.862213 | -3.959669 |
| 17 | -6.654528 | -0.569996 | 0.230277  |
| 17 | 4.075841  | 0.855912  | 0.718552  |
| 17 | 2.098825  | 0.746122  | 5.801055  |
| 17 | -0.050036 | 4.955395  | -1.500463 |
| 17 | -3.451176 | 4.714521  | 2.759455  |
| 17 | 0.848493  | -5.012652 | -0.549611 |
| 17 | -2.173447 | -4.428061 | 3.950670  |
| 35 | 2.623592  | 2.817518  | -2.813349 |
| 35 | 2.074882  | -2.937880 | -3.154891 |
| 1  | -4.536016 | -3.311230 | -1.246665 |
| 1  | -2.868612 | -4.883318 | 0.155619  |
| 1  | -5.073841 | 1.966657  | -1.900312 |
| 1  | -3.836845 | 4.139698  | -0.920738 |
| 1  | 0.499009  | 4.990253  | 2.104055  |
| 1  | 2.395986  | 3.405483  | 3.157400  |
| 1  | 3.060367  | -1.880371 | 3.620527  |
| 1  | 1.602237  | -4.041895 | 2.975559  |

---

**BDHA-S2**

---

Number of imaginary frequencies : 0 Electronic energy : HF=-2147.2668345  
Zero-point correction= 0.903962 (Hartree/Particle)  
Thermal correction to Energy= 0.957278  
Thermal correction to Enthalpy= 0.958222  
Thermal correction to Gibbs Free Energy= 0.817652  
Sum of electronic and zero-point Energies= -2146.362872  
Sum of electronic and thermal Energies= -2146.309557  
Sum of electronic and thermal Enthalpies= -2146.308612  
Sum of electronic and thermal Free Energies= -2146.449183

.....  
Cartesian Coordinates  
.....

|   |           |           |           |
|---|-----------|-----------|-----------|
| 6 | 0.908508  | -4.255192 | -0.185206 |
| 6 | 1.316699  | -2.866962 | -0.035739 |
| 7 | 0.212010  | -2.059536 | -0.067779 |
| 6 | -0.883303 | -2.863969 | -0.253882 |
| 6 | -0.456563 | -4.253678 | -0.318816 |
| 6 | 2.624341  | -2.426301 | 0.134439  |
| 6 | 3.056677  | -1.108302 | 0.221987  |
| 7 | 2.247787  | -0.000797 | 0.171672  |
| 6 | 3.057419  | 1.106154  | 0.222198  |
| 6 | 4.443114  | 0.684398  | 0.339956  |
| 6 | 4.442654  | -0.687498 | 0.339795  |
| 6 | 2.625969  | 2.424453  | 0.134804  |
| 6 | 1.318646  | 2.866012  | -0.035493 |

|    |           |           |           |
|----|-----------|-----------|-----------|
| 7  | 0.213401  | 2.059347  | -0.067685 |
| 6  | -0.881323 | 2.864532  | -0.254054 |
| 6  | -0.453611 | 4.253948  | -0.318891 |
| 6  | 0.911445  | 4.254514  | -0.185108 |
| 77 | 0.203639  | -0.000085 | 0.039318  |
| 7  | -1.833862 | 0.000619  | -0.279079 |
| 6  | -2.638571 | 1.107459  | -0.374653 |
| 6  | -4.021266 | 0.687549  | -0.504741 |
| 6  | -4.021747 | -0.684835 | -0.504617 |
| 6  | -2.639348 | -1.105691 | -0.374387 |
| 6  | 1.854499  | 5.417749  | -0.250810 |
| 6  | 2.522483  | 5.565666  | -1.629906 |
| 6  | -1.366188 | 5.416638  | -0.569762 |
| 6  | -1.741471 | 5.568867  | -2.054971 |
| 6  | -2.194247 | 2.424862  | -0.360952 |
| 6  | 5.618204  | -1.617576 | 0.369306  |
| 6  | 6.017217  | -2.119217 | -1.030569 |
| 6  | 5.619290  | 1.613674  | 0.369730  |
| 6  | 6.018631  | 2.115483  | -1.029991 |
| 6  | -2.195940 | -2.423394 | -0.360599 |
| 6  | -5.189652 | -1.614304 | -0.629190 |
| 6  | -5.378047 | -2.151406 | -2.059129 |
| 6  | -5.188493 | 1.617799  | -0.629803 |
| 6  | -5.375737 | 2.155112  | -2.059833 |
| 6  | -1.370017 | -5.415720 | -0.569484 |
| 6  | -1.745578 | -5.567834 | -2.054631 |
| 6  | 1.850733  | -5.419093 | -0.251026 |
| 6  | 2.518646  | -5.567303 | -1.630124 |
| 6  | -0.302705 | -0.000052 | 2.062134  |
| 6  | -0.827442 | -1.232209 | 2.643985  |
| 6  | -2.172750 | -1.248417 | 2.819892  |
| 6  | -2.956524 | 0.001357  | 2.748232  |
| 6  | -2.171463 | 1.250391  | 2.819841  |
| 6  | -0.826186 | 1.232685  | 2.643948  |
| 8  | -4.188673 | 0.002010  | 2.728870  |
| 6  | 0.362541  | -0.000191 | -2.082127 |
| 1  | -2.954871 | 3.190071  | -0.460846 |
| 1  | 3.393675  | 3.188115  | 0.176846  |
| 1  | 3.391535  | -3.190488 | 0.176297  |
| 1  | -2.957134 | -3.188059 | -0.460326 |
| 1  | -0.116096 | -0.891086 | -2.499252 |
| 1  | -0.113274 | 0.892210  | -2.499266 |
| 1  | 1.421971  | -0.001892 | -2.359846 |
| 1  | -5.066601 | -2.452859 | 0.066397  |
| 1  | -6.099175 | -1.094265 | -0.311979 |
| 1  | -4.487152 | -2.690035 | -2.397239 |
| 1  | -5.549222 | -1.329315 | -2.760974 |
| 1  | -2.284798 | -5.305720 | 0.026130  |
| 1  | -0.891376 | -6.337399 | -0.221184 |
| 1  | 1.309234  | -6.340430 | -0.010853 |
| 1  | 2.626226  | -5.314272 | 0.518108  |
| 1  | -6.098547 | 1.098333  | -0.313174 |
| 1  | -5.065301 | 2.456256  | 0.065884  |
| 1  | 5.396353  | -2.477400 | 1.013333  |
| 1  | 6.473412  | -1.109121 | 0.827571  |
| 1  | -6.232539 | -2.833597 | -2.115233 |
| 1  | 6.474160  | 1.104492  | 0.827819  |
| 1  | 5.398033  | 2.473447  | 1.014030  |
| 1  | 6.871294  | 2.800008  | -0.975106 |
| 1  | 5.186899  | 2.640778  | -1.509133 |

|   |           |           |           |
|---|-----------|-----------|-----------|
| 1 | 6.293011  | 1.276608  | -1.676674 |
| 1 | 6.292171  | -1.280325 | -1.676986 |
| 1 | 5.185126  | -2.643790 | -1.509877 |
| 1 | 6.869410  | -2.804344 | -0.975898 |
| 1 | 3.078531  | -4.664317 | -1.891731 |
| 1 | 1.765186  | -5.723228 | -2.408112 |
| 1 | 3.209290  | -6.416674 | -1.645097 |
| 1 | -2.421708 | -6.415482 | -2.205875 |
| 1 | -0.850882 | -5.728826 | -2.663696 |
| 1 | -2.238244 | -4.664496 | -2.426635 |
| 1 | -6.229790 | 2.837816  | -2.116381 |
| 1 | -5.546987 | 1.333158  | -2.761815 |
| 1 | -4.484325 | 2.693230  | -2.397387 |
| 1 | -0.886892 | 6.337998  | -0.221518 |
| 1 | -2.281123 | 5.307394  | 0.025756  |
| 1 | -2.416934 | 6.417016  | -2.206380 |
| 1 | -2.234790 | 4.665866  | -2.426930 |
| 1 | -0.846586 | 5.729106  | -2.663955 |
| 1 | 2.629941  | 5.312254  | 0.518283  |
| 1 | 1.313678  | 6.339445  | -0.010481 |
| 1 | 3.213781  | 6.414508  | -1.644769 |
| 1 | 1.769125  | 5.722291  | -2.407850 |
| 1 | 3.081663  | 4.662286  | -1.891659 |
| 1 | -2.724044 | 2.164744  | 3.017603  |
| 6 | 0.066358  | -2.417090 | 2.897454  |
| 1 | 0.123189  | -2.591747 | 3.977976  |
| 1 | -0.319617 | -3.327529 | 2.431441  |
| 1 | 1.074843  | -2.237703 | 2.527182  |
| 6 | 0.068966  | 2.416546  | 2.897528  |
| 1 | 0.125639  | 2.591244  | 3.978047  |
| 1 | 1.077354  | 2.235855  | 2.527619  |
| 1 | -0.315745 | 3.327401  | 2.431282  |
| 1 | -2.726315 | -2.162178 | 3.017720  |

---

CSS<sup>TS</sup>(B-E)<sub>DHA-S2</sub>

---

Number of imaginary frequencies : 1 Electronic energy : HF=-2688.0873251  
Zero-point correction= 1.120237 (Hartree/Particle)  
Thermal correction to Energy= 1.183965  
Thermal correction to Enthalpy= 1.184909  
Thermal correction to Gibbs Free Energy= 1.022387  
Sum of electronic and zero-point Energies= -2686.967089  
Sum of electronic and thermal Energies= -2686.903360  
Sum of electronic and thermal Enthalpies= -2686.902416  
Sum of electronic and thermal Free Energies= -2687.064938

.....  
Cartesian Coordinates

|   |          |           |          |
|---|----------|-----------|----------|
| 6 | 4.014867 | -3.522939 | 2.109594 |
| 6 | 3.641191 | -2.370892 | 1.423093 |
| 6 | 3.221014 | -1.235663 | 2.126712 |
| 6 | 3.198880 | -1.249411 | 3.534525 |
| 6 | 3.578115 | -2.405699 | 4.213226 |
| 6 | 3.977825 | -3.543098 | 3.506004 |
| 6 | 2.726205 | -0.000086 | 4.241350 |
| 6 | 3.199658 | 1.248848  | 3.534355 |
| 6 | 3.221839 | 1.234868  | 2.126546 |
| 6 | 2.802340 | -0.000312 | 1.433983 |
| 6 | 3.642858 | 2.369701  | 1.422781 |

|    |           |           |           |
|----|-----------|-----------|-----------|
| 6  | 4.017281  | 3.521602  | 2.109124  |
| 6  | 3.980151  | 3.542007  | 3.505526  |
| 6  | 3.579629  | 2.404986  | 4.212897  |
| 6  | 0.084959  | 0.000209  | 1.544176  |
| 6  | -0.328687 | -1.244553 | 2.185381  |
| 6  | -1.510272 | -1.233978 | 2.865344  |
| 6  | -2.230950 | 0.000725  | 3.165152  |
| 6  | -1.509808 | 1.235154  | 2.865308  |
| 6  | -0.328267 | 1.245163  | 2.185251  |
| 77 | -0.580415 | 0.000016  | -0.755192 |
| 6  | -1.395467 | 0.000409  | -2.681059 |
| 6  | 0.395227  | -2.549909 | 1.988191  |
| 8  | -3.362277 | 0.000943  | 3.673183  |
| 6  | 0.396051  | 2.550219  | 1.987766  |
| 7  | -2.505573 | 0.001951  | -0.055565 |
| 6  | -3.269924 | 1.107192  | 0.226028  |
| 6  | -4.556842 | 0.689022  | 0.755446  |
| 6  | -4.557878 | -0.680876 | 0.756429  |
| 6  | -3.271661 | -1.101736 | 0.227440  |
| 6  | -5.640989 | 1.620699  | 1.201037  |
| 6  | -6.485704 | 2.162124  | 0.034112  |
| 6  | -2.878452 | 2.423022  | 0.016423  |
| 6  | -1.664613 | 2.861552  | -0.496611 |
| 7  | -0.609483 | 2.051955  | -0.832426 |
| 6  | 0.400682  | 2.863805  | -1.281357 |
| 6  | -0.023930 | 4.253697  | -1.216972 |
| 6  | -1.305940 | 4.252330  | -0.732749 |
| 6  | -2.882445 | -2.418424 | 0.019087  |
| 6  | -1.669576 | -2.859455 | -0.494077 |
| 7  | -0.613188 | -2.051935 | -0.830908 |
| 6  | 0.395248  | -2.865832 | -1.280054 |
| 6  | -0.031896 | -4.254904 | -1.214889 |
| 6  | -1.313539 | -4.250995 | -0.729688 |
| 6  | -5.643318 | -1.610305 | 1.203554  |
| 6  | -6.489683 | -2.151391 | 0.037677  |
| 6  | 1.652105  | 2.424197  | -1.692780 |
| 6  | 2.080742  | 1.105596  | -1.796545 |
| 7  | 1.318277  | -0.001925 | -1.503757 |
| 6  | 2.078691  | -1.111037 | -1.795899 |
| 6  | 3.394420  | -0.691643 | -2.242329 |
| 6  | 3.395701  | 0.683527  | -2.242707 |
| 6  | 0.805777  | 5.419057  | -1.663859 |
| 6  | 0.819980  | 5.591089  | -3.193436 |
| 6  | -2.227299 | 5.416600  | -0.526890 |
| 6  | -3.241883 | 5.581949  | -1.672724 |
| 6  | 1.647494  | -2.428765 | -1.691701 |
| 6  | 4.485859  | -1.620272 | -2.684061 |
| 6  | 4.292132  | -2.125375 | -4.125366 |
| 6  | 4.488888  | 1.609895  | -2.684858 |
| 6  | 4.296441  | 2.114212  | -4.126607 |
| 6  | 0.795386  | -5.421987 | -1.661776 |
| 6  | 0.810043  | -5.593527 | -3.191407 |
| 6  | -2.236911 | -5.413483 | -0.522789 |
| 6  | -3.251186 | -5.578579 | -1.668928 |
| 1  | -3.606079 | -3.182151 | 0.278573  |
| 1  | -3.600870 | 3.188225  | 0.274951  |
| 1  | 2.364911  | 3.188919  | -1.979137 |
| 1  | 2.358856  | -3.194965 | -1.977694 |
| 1  | -2.008497 | -0.894199 | -2.820494 |
| 1  | -2.013273 | 0.892125  | -2.817874 |

|   |           |           |           |
|---|-----------|-----------|-----------|
| 1 | -0.581452 | 0.003685  | -3.412455 |
| 1 | 1.824978  | -5.306980 | -1.299205 |
| 1 | 0.413266  | -6.338180 | -1.198908 |
| 1 | 1.201453  | -4.696769 | -3.681371 |
| 1 | -0.203578 | -5.757948 | -3.569425 |
| 1 | 4.543681  | -2.480657 | -2.005299 |
| 1 | 5.452129  | -1.110413 | -2.605939 |
| 1 | 5.454247  | 1.098419  | -2.606044 |
| 1 | 4.548009  | 2.470702  | -2.006748 |
| 1 | -1.649811 | -6.332933 | -0.423814 |
| 1 | -2.777195 | -5.295517 | 0.424876  |
| 1 | 1.835295  | 5.301523  | -1.301914 |
| 1 | 0.426059  | 6.335958  | -1.200407 |
| 1 | 1.430143  | -6.445751 | -3.488111 |
| 1 | -1.638609 | 6.335195  | -0.429453 |
| 1 | -2.767281 | 5.300777  | 0.421223  |
| 1 | -3.907866 | 6.431736  | -1.491198 |
| 1 | -3.855144 | 4.682565  | -1.783244 |
| 1 | -2.725325 | 5.746735  | -2.623300 |
| 1 | -0.193395 | 5.758528  | -3.570784 |
| 1 | 1.208534  | 4.693356  | -3.683896 |
| 1 | 1.442338  | 6.441628  | -3.490251 |
| 1 | 3.344402  | 2.643071  | -4.231783 |
| 1 | 4.285771  | 1.275872  | -4.829627 |
| 1 | 5.102425  | 2.795804  | -4.417028 |
| 1 | 5.097050  | -2.808306 | -4.415599 |
| 1 | 4.282364  | -1.287529 | -4.828986 |
| 1 | 3.339315  | -2.652974 | -4.229806 |
| 1 | -3.918821 | -6.426894 | -1.486587 |
| 1 | -2.734444 | -5.745608 | -2.619011 |
| 1 | -3.862734 | -4.678211 | -1.780960 |
| 1 | -6.291472 | -1.088935 | 1.914932  |
| 1 | -5.202491 | -2.446190 | 1.759450  |
| 1 | -7.266843 | -2.833970 | 0.396841  |
| 1 | -5.867414 | -2.691046 | -0.683395 |
| 1 | -6.975954 | -1.331115 | -0.499541 |
| 1 | -5.199144 | 2.456407  | 1.756411  |
| 1 | -6.290511 | 1.101074  | 1.912444  |
| 1 | -7.262432 | 2.845745  | 0.392229  |
| 1 | -6.972385 | 1.342092  | -0.503104 |
| 1 | -5.862208 | 2.700713  | -0.686693 |
| 1 | -1.984243 | 2.162179  | 3.173924  |
| 1 | 3.034534  | -0.000109 | 5.290877  |
| 1 | 3.012305  | -0.000441 | 0.367594  |
| 1 | 1.623558  | 0.000246  | 4.238278  |
| 1 | 4.337177  | 4.401622  | 1.559550  |
| 1 | 4.272049  | 4.437902  | 4.045013  |
| 1 | 4.269143  | -4.439110 | 4.045611  |
| 1 | 4.334117  | -4.403268 | 1.560142  |
| 1 | 3.560868  | -2.419543 | 5.299712  |
| 1 | 3.649909  | -2.343993 | 0.338799  |
| 1 | 3.562354  | 2.419001  | 5.299380  |
| 1 | 3.651640  | 2.342637  | 0.338489  |
| 1 | 1.497272  | 0.000130  | 1.330368  |
| 1 | -0.320777 | -3.370058 | 1.902859  |
| 1 | 1.019642  | -2.546026 | 1.101151  |
| 1 | 1.040176  | -2.757660 | 2.846633  |
| 1 | -0.319663 | 3.370511  | 1.901238  |
| 1 | 1.040306  | 2.758414  | 2.846639  |
| 1 | 1.021236  | 2.545616  | 1.101293  |



1 -1.985026 -2.160788 3.174113

---

OSST<sup>S</sup>TS(B-C)<sub>DHA-S2</sub>

---

Number of imaginary frequencies : 1 Electronic energy : HF=-2688.0479772  
Zero-point correction= 1.118152 (Hartree/Particle)  
Thermal correction to Energy= 1.182067  
Thermal correction to Enthalpy= 1.183011  
Thermal correction to Gibbs Free Energy= 1.019059  
Sum of electronic and zero-point Energies= -2686.929826  
Sum of electronic and thermal Energies= -2686.865910  
Sum of electronic and thermal Enthalpies= -2686.864966  
Sum of electronic and thermal Free Energies= -2687.028918

.....  
Cartesian Coordinates

.....  
6 1.365454 4.215228 0.972365  
6 0.908220 3.092932 0.169168  
7 1.488707 1.937461 0.626927  
6 2.363755 2.286983 1.638752  
6 2.287802 3.719946 1.860283  
6 0.144674 3.189641 -0.990170  
6 -0.001061 2.197047 -1.954305  
7 0.436526 0.902425 -1.821644  
6 0.335116 0.301763 -3.062552  
6 -0.255227 1.240338 -3.998673  
6 -0.485572 2.405945 -3.308491  
6 0.721337 -1.001381 -3.354531  
6 1.168809 -1.961635 -2.449650  
7 1.352518 -1.743995 -1.112335  
6 1.726753 -2.927975 -0.538759  
6 1.710484 -3.974446 -1.551632  
6 1.395779 -3.367344 -2.742748  
77 1.273033 0.079086 -0.167581  
7 2.370835 -0.707805 1.384645  
6 2.587889 -2.038713 1.617612  
6 3.449644 -2.184548 2.782737  
6 3.801767 -0.916680 3.175020  
6 3.115155 0.004334 2.282792  
6 1.326727 -3.977419 -4.110170  
6 2.563227 -3.657113 -4.969342  
6 2.086888 -5.405624 -1.310850  
6 3.606164 -5.643435 -1.383046  
6 2.212482 -3.070209 0.759933  
6 -1.034971 3.700768 -3.828019  
6 0.063099 4.683542 -4.273289  
6 -0.492442 0.961093 -5.452320  
6 0.789105 1.073541 -6.298211  
6 3.138048 1.395593 2.369650  
6 4.742479 -0.506482 4.267792  
6 6.126933 -0.090333 3.738465  
6 3.927309 -3.493175 3.337019  
6 5.177662 -4.027800 2.615200  
6 3.122354 4.475192 2.850463  
6 4.567710 4.694475 2.367610  
6 0.961456 5.642173 0.752543  
6 1.798613 6.339494 -0.335243  
6 -0.554879 -0.604785 0.896868  
6 -0.776741 -0.318932 2.296356

|   |           |           |           |
|---|-----------|-----------|-----------|
| 6 | -1.971397 | -0.654315 | 2.917663  |
| 6 | -2.982072 | -1.392205 | 2.268382  |
| 6 | -2.732731 | -1.763962 | 0.932613  |
| 6 | -1.572195 | -1.407953 | 0.260285  |
| 8 | -4.113884 | -1.684744 | 2.870507  |
| 6 | 3.232888  | 0.267875  | -1.049937 |
| 6 | -5.716175 | 0.162049  | 2.119952  |
| 6 | -4.892377 | 0.596927  | 0.995774  |
| 6 | -5.137005 | 0.067026  | -0.294278 |
| 6 | -6.243963 | -0.941420 | -0.487294 |
| 6 | -7.341450 | -0.879023 | 0.548051  |
| 6 | -7.057113 | -0.362229 | 1.829506  |
| 1 | 2.460399  | -4.076903 | 1.076049  |
| 1 | 0.595524  | -1.323981 | -4.381508 |
| 1 | -0.250875 | 4.168427  | -1.234901 |
| 1 | 3.774028  | 1.822995  | 3.136037  |
| 1 | 3.755960  | 1.093815  | -0.562411 |
| 1 | 3.786661  | -0.661367 | -0.909596 |
| 1 | 3.105903  | 0.469994  | -2.116499 |
| 1 | 4.309065  | 0.323979  | 4.839318  |
| 1 | 4.859484  | -1.333377 | 4.976391  |
| 1 | 6.043620  | 0.747529  | 3.039515  |
| 1 | 6.599844  | -0.918361 | 3.201777  |
| 1 | 3.137631  | 3.939879  | 3.808078  |
| 1 | 2.657239  | 5.445832  | 3.052956  |
| 1 | 1.057958  | 6.196908  | 1.692278  |
| 1 | -0.100140 | 5.688986  | 0.481643  |
| 1 | 4.149558  | -3.376648 | 4.403518  |
| 1 | 3.124044  | -4.236809 | 3.275498  |
| 1 | -1.657834 | 4.172093  | -3.058296 |
| 1 | -1.701950 | 3.499007  | -4.673307 |
| 1 | 6.788213  | 0.210744  | 4.557377  |
| 1 | -1.243098 | 1.658604  | -5.839192 |
| 1 | -0.919161 | -0.042402 | -5.572175 |
| 1 | 0.586301  | 0.854048  | -7.351318 |
| 1 | 1.554780  | 0.376867  | -5.943892 |
| 1 | 1.207824  | 2.082270  | -6.232352 |
| 1 | 0.660876  | 4.253869  | -5.082676 |
| 1 | 0.743678  | 4.910309  | -3.447129 |
| 1 | -0.370355 | 5.623833  | -4.628683 |
| 1 | 1.720254  | 5.808375  | -1.288685 |
| 1 | 2.856198  | 6.358110  | -0.055665 |
| 1 | 1.465786  | 7.371099  | -0.488449 |
| 1 | 5.153905  | 5.239917  | 3.114090  |
| 1 | 4.580716  | 5.267291  | 1.435415  |
| 1 | 5.064721  | 3.739452  | 2.172363  |
| 1 | 5.489835  | -4.992328 | 3.028470  |
| 1 | 6.011117  | -3.325988 | 2.714914  |
| 1 | 4.984839  | -4.158973 | 1.546107  |
| 1 | 1.587002  | -6.042440 | -2.049013 |
| 1 | 1.712894  | -5.727677 | -0.331784 |
| 1 | 3.851788  | -6.691768 | -1.184983 |
| 1 | 4.133097  | -5.023394 | -0.651415 |
| 1 | 3.991173  | -5.381816 | -2.373273 |
| 1 | 0.425268  | -3.626623 | -4.628507 |
| 1 | 1.220333  | -5.063646 | -4.019196 |
| 1 | 2.480659  | -4.108233 | -5.963445 |
| 1 | 3.472453  | -4.037485 | -4.493953 |
| 1 | 2.685332  | -2.576603 | -5.092119 |
| 1 | -3.512754 | -2.312242 | 0.414332  |

|   |            |           |           |
|---|------------|-----------|-----------|
| 1 | -4.981277  | -0.879120 | 2.544361  |
| 1 | -6.664260  | -0.856741 | -1.495951 |
| 1 | -5.655449  | 0.797743  | 3.005622  |
| 1 | -5.791391  | -1.946682 | -0.441736 |
| 6 | 0.162125   | 0.459506  | 3.179652  |
| 1 | -0.346696  | 0.741722  | 4.104981  |
| 1 | 1.039721   | -0.123470 | 3.457730  |
| 1 | 0.500960   | 1.369596  | 2.694494  |
| 6 | -1.566310  | -1.841077 | -1.183714 |
| 1 | -1.214210  | -1.049632 | -1.834171 |
| 1 | -0.950658  | -2.727850 | -1.345440 |
| 1 | -2.584881  | -2.088576 | -1.493197 |
| 6 | -4.299787  | 0.423033  | -1.348635 |
| 6 | -3.786549  | 1.447978  | 1.187469  |
| 6 | -2.935930  | 1.759877  | 0.136244  |
| 1 | -2.064295  | 2.382270  | 0.302504  |
| 6 | -3.195198  | 1.249710  | -1.139437 |
| 1 | -2.533264  | 1.485723  | -1.964318 |
| 6 | -8.620013  | -1.364006 | 0.271572  |
| 6 | -8.065324  | -0.369705 | 2.808330  |
| 6 | -9.332867  | -0.865709 | 2.524606  |
| 1 | -10.101895 | -0.860183 | 3.291242  |
| 6 | -9.615487  | -1.362610 | 1.249068  |
| 1 | -10.605213 | -1.744048 | 1.017007  |
| 1 | -4.493557  | 0.022417  | -2.340605 |
| 1 | -3.591632  | 1.837732  | 2.181601  |
| 1 | -8.837685  | -1.749208 | -0.721710 |
| 1 | -7.842033  | 0.025740  | 3.795623  |
| 1 | -2.163072  | -0.341504 | 3.939832  |

---

CSS<sup>E</sup>EDHA-S2

---

Number of imaginary frequencies : 0 Electronic energy : HF=-2688.1199272  
Zero-point correction= 1.122746 (Hartree/Particle)  
Thermal correction to Energy= 1.188001  
Thermal correction to Enthalpy= 1.188945  
Thermal correction to Gibbs Free Energy= 1.020656  
Sum of electronic and zero-point Energies= -2686.997181  
Sum of electronic and thermal Energies= -2686.931927  
Sum of electronic and thermal Enthalpies= -2686.930982  
Sum of electronic and thermal Free Energies= -2687.099271

.....  
Cartesian Coordinates  
.....

|   |           |           |          |
|---|-----------|-----------|----------|
| 6 | 3.785188  | -3.648567 | 2.134803 |
| 6 | 3.806882  | -2.457066 | 1.432845 |
| 6 | 3.478630  | -1.236541 | 2.078378 |
| 6 | 3.090546  | -1.259219 | 3.451348 |
| 6 | 3.093960  | -2.467444 | 4.141602 |
| 6 | 3.444143  | -3.655152 | 3.496952 |
| 6 | 2.542239  | 0.001070  | 4.036090 |
| 6 | 3.088179  | 1.262811  | 3.452290 |
| 6 | 3.476276  | 1.241860  | 2.079307 |
| 6 | 3.571186  | 0.003004  | 1.403480 |
| 6 | 3.802166  | 2.463461  | 1.434616 |
| 6 | 3.778263  | 3.654405  | 2.137432 |
| 6 | 3.437259  | 3.659364  | 3.499606 |
| 6 | 3.089315  | 2.470545  | 4.143413 |
| 6 | -0.061432 | -0.000768 | 2.047047 |

|    |           |           |           |
|----|-----------|-----------|-----------|
| 6  | -0.685058 | -1.241952 | 2.375075  |
| 6  | -1.977805 | -1.235542 | 2.838393  |
| 6  | -2.725122 | -0.002746 | 3.037239  |
| 6  | -1.979602 | 1.231135  | 2.838490  |
| 6  | -0.686867 | 1.239474  | 2.375125  |
| 77 | -0.542132 | -0.000207 | -0.820143 |
| 6  | -0.984148 | -0.001028 | -2.836084 |
| 6  | 0.083432  | -2.532289 | 2.244873  |
| 8  | -3.934389 | -0.003631 | 3.362989  |
| 6  | 0.079619  | 2.530999  | 2.244876  |
| 7  | -2.511715 | -0.003580 | -0.302861 |
| 6  | -3.298005 | 1.098314  | -0.065281 |
| 6  | -4.621674 | 0.676759  | 0.362717  |
| 6  | -4.619522 | -0.691175 | 0.362047  |
| 6  | -3.294530 | -1.108173 | -0.066275 |
| 6  | -5.725515 | 1.605505  | 0.761467  |
| 6  | -6.487974 | 2.188611  | -0.440876 |
| 6  | -2.881767 | 2.415736  | -0.190226 |
| 6  | -1.616484 | 2.859697  | -0.550437 |
| 7  | -0.543234 | 2.045738  | -0.818386 |
| 6  | 0.520473  | 2.865027  | -1.115519 |
| 6  | 0.111316  | 4.255481  | -1.010689 |
| 6  | -1.215267 | 4.252588  | -0.665589 |
| 6  | -2.874068 | -2.424170 | -0.192263 |
| 6  | -1.607249 | -2.863791 | -0.552340 |
| 7  | -0.536566 | -2.046180 | -0.819489 |
| 6  | 0.529858  | -2.861798 | -1.116831 |
| 6  | 0.125255  | -4.253652 | -1.012801 |
| 6  | -1.201435 | -4.255297 | -0.668123 |
| 6  | -5.720597 | -1.623707 | 0.759600  |
| 6  | -6.481602 | -2.207041 | -0.443569 |
| 6  | 1.789698  | 2.428602  | -1.470818 |
| 6  | 2.218038  | 1.112250  | -1.592930 |
| 7  | 1.451977  | 0.003209  | -1.308473 |
| 6  | 2.221639  | -1.103216 | -1.593531 |
| 6  | 3.529104  | -0.680998 | -2.060533 |
| 6  | 3.526872  | 0.694535  | -2.060153 |
| 6  | 1.003316  | 5.428572  | -1.284523 |
| 6  | 1.167937  | 5.719927  | -2.786997 |
| 6  | -2.133659 | 5.422449  | -0.479003 |
| 6  | -3.026836 | 5.680578  | -1.705866 |
| 6  | 1.797628  | -2.421010 | -1.472005 |
| 6  | 4.611476  | -1.606550 | -2.531171 |
| 6  | 4.379199  | -2.112908 | -3.966294 |
| 6  | 4.606140  | 1.623793  | -2.530608 |
| 6  | 4.372354  | 2.129186  | -3.965834 |
| 6  | 1.021264  | -5.423654 | -1.286759 |
| 6  | 1.187355  | -5.714002 | -2.789262 |
| 6  | -2.116030 | -5.428269 | -0.482451 |
| 6  | -3.007863 | -5.688727 | -1.709800 |
| 1  | -3.610067 | -3.188890 | 0.026239  |
| 1  | -3.620117 | 3.177927  | 0.029145  |
| 1  | 2.518131  | 3.197786  | -1.700091 |
| 1  | 2.528549  | -3.187694 | -1.701725 |
| 1  | -2.069856 | -0.006535 | -2.959369 |
| 1  | -0.559159 | 0.897238  | -3.291627 |
| 1  | -0.549999 | -0.894318 | -3.292781 |
| 1  | 2.006978  | -5.245749 | -0.837982 |
| 1  | 0.620093  | -6.313763 | -0.790165 |
| 1  | 1.599028  | -4.845849 | -3.313166 |

|   |           |           |           |
|---|-----------|-----------|-----------|
| 1 | 0.219453  | -5.943167 | -3.245303 |
| 1 | 4.690383  | -2.469481 | -1.857136 |
| 1 | 5.578974  | -1.095360 | -2.479285 |
| 1 | 5.575390  | 1.115953  | -2.478507 |
| 1 | 4.681952  | 2.487122  | -1.856732 |
| 1 | -1.522000 | -6.323990 | -0.270737 |
| 1 | -2.749916 | -5.269507 | 0.398873  |
| 1 | 1.989781  | 5.253866  | -0.836143 |
| 1 | 0.599315  | 6.317172  | -0.787525 |
| 1 | 1.856026  | -6.564715 | -2.956952 |
| 1 | -1.542506 | 6.320021  | -0.267085 |
| 1 | -2.766663 | 5.261169  | 0.402499  |
| 1 | -3.692341 | 6.533413  | -1.537427 |
| 1 | -3.642432 | 4.804666  | -1.931682 |
| 1 | -2.416149 | 5.890243  | -2.589512 |
| 1 | 0.199121  | 5.945964  | -3.242657 |
| 1 | 1.582364  | 4.853316  | -3.311279 |
| 1 | 1.833684  | 6.572938  | -2.954646 |
| 1 | 3.416095  | 2.655262  | -4.041890 |
| 1 | 4.343526  | 1.291223  | -4.668764 |
| 1 | 5.167946  | 2.813123  | -4.278630 |
| 1 | 5.177088  | -2.794137 | -4.279145 |
| 1 | 4.347385  | -1.275121 | -4.669306 |
| 1 | 3.424741  | -2.642271 | -4.042162 |
| 1 | -3.670642 | -6.543818 | -1.542054 |
| 1 | -2.396136 | -5.895949 | -2.593303 |
| 1 | -3.626225 | -4.814719 | -1.935429 |
| 1 | -6.417789 | -1.093059 | 1.414665  |
| 1 | -5.305550 | -2.436216 | 1.367328  |
| 1 | -7.272966 | -2.890121 | -0.117747 |
| 1 | -5.808024 | -2.758085 | -1.108064 |
| 1 | -6.941228 | -1.408007 | -1.033965 |
| 1 | -5.312855 | 2.418109  | 1.370680  |
| 1 | -6.421310 | 1.071812  | 1.415537  |
| 1 | -7.281320 | 2.868912  | -0.114063 |
| 1 | -6.945263 | 1.389244  | -1.032640 |
| 1 | -5.815908 | 2.742650  | -1.104411 |
| 1 | -2.503229 | 2.157964  | 3.053421  |
| 1 | 2.558283  | 0.000672  | 5.129373  |
| 1 | 3.834554  | 0.003695  | 0.352259  |
| 1 | 1.453981  | 0.000169  | 3.736796  |
| 1 | 4.031317  | 4.585261  | 1.639449  |
| 1 | 3.433722  | 4.593055  | 4.053116  |
| 1 | 3.442350  | -4.589242 | 4.049795  |
| 1 | 4.040043  | -4.578576 | 1.636154  |
| 1 | 2.801072  | -2.484140 | 5.187843  |
| 1 | 4.083337  | -2.431883 | 0.385364  |
| 1 | 2.796394  | 2.485942  | 5.189664  |
| 1 | 4.078543  | 2.439503  | 0.387082  |
| 1 | 0.926831  | -0.000031 | 1.594921  |
| 1 | -0.570362 | -3.355019 | 1.949530  |
| 1 | 0.886610  | -2.455805 | 1.511687  |
| 1 | 0.541672  | -2.798811 | 3.202403  |
| 1 | -0.575332 | 3.352562  | 1.948842  |
| 1 | 0.536889  | 2.798637  | 3.202556  |
| 1 | 0.883301  | 2.455526  | 1.512150  |
| 1 | -2.500094 | -2.163140 | 3.053257  |

-----  
**P1DHA-S2**  
 -----

Number of imaginary frequencies : 0 Electronic energy : HF=-925.7255936  
 Zero-point correction= 0.358328 (Hartree/Particle)  
 Thermal correction to Energy= 0.377268  
 Thermal correction to Enthalpy= 0.378212  
 Thermal correction to Gibbs Free Energy= 0.311736  
 Sum of electronic and zero-point Energies= -925.367265  
 Sum of electronic and thermal Energies= -925.348326  
 Sum of electronic and thermal Enthalpies= -925.347381  
 Sum of electronic and thermal Free Energies= -925.413857

.....  
 Cartesian Coordinates  
 .....

|   |           |           |           |
|---|-----------|-----------|-----------|
| 6 | 4.175883  | -0.786992 | -0.856052 |
| 6 | 2.830751  | -0.956336 | -1.176567 |
| 6 | 1.844448  | -0.155354 | -0.591389 |
| 6 | 2.217756  | 0.840164  | 0.324368  |
| 6 | 3.570815  | 1.012270  | 0.633314  |
| 6 | 4.547602  | 0.203766  | 0.054466  |
| 6 | 1.155507  | 1.677634  | 0.996471  |
| 6 | -0.075287 | 1.864793  | 0.142448  |
| 6 | -0.429347 | 0.887262  | -0.799174 |
| 6 | 0.388427  | -0.375515 | -0.935890 |
| 6 | -1.547819 | 1.100078  | -1.614147 |
| 6 | -2.331370 | 2.242427  | -1.475365 |
| 6 | -1.991839 | 3.199863  | -0.519087 |
| 6 | -0.861850 | 3.012837  | 0.273137  |
| 6 | -0.233998 | -1.617637 | -0.117158 |
| 6 | -0.280020 | -1.344480 | 1.366738  |
| 6 | -1.412634 | -0.877916 | 1.922887  |
| 6 | -2.685336 | -0.804336 | 1.179714  |
| 6 | -2.704143 | -1.500051 | -0.123456 |
| 6 | -1.581235 | -1.941732 | -0.713758 |
| 6 | 0.947098  | -1.645834 | 2.181903  |
| 8 | -3.693704 | -0.287227 | 1.654878  |
| 6 | -1.594198 | -2.680445 | -2.021420 |
| 1 | -3.683046 | -1.646699 | -0.571117 |
| 1 | 1.568964  | 2.651921  | 1.277583  |
| 1 | 0.346448  | -0.698904 | -1.981053 |
| 1 | 0.863636  | 1.191078  | 1.938230  |
| 1 | -3.200655 | 2.384630  | -2.109638 |
| 1 | -2.596572 | 4.093654  | -0.400495 |
| 1 | 5.593456  | 0.351292  | 0.306014  |
| 1 | 4.929389  | -1.416478 | -1.319423 |
| 1 | 3.857679  | 1.788635  | 1.337953  |
| 1 | 2.536558  | -1.720040 | -1.892841 |
| 1 | -0.580257 | 3.767053  | 1.003379  |
| 1 | -1.807769 | 0.359161  | -2.363311 |
| 1 | 0.459628  | -2.445502 | -0.310574 |
| 1 | 0.815748  | -1.334285 | 3.221160  |
| 1 | 1.131230  | -2.728233 | 2.174472  |
| 1 | 1.847842  | -1.175974 | 1.781475  |
| 1 | -2.613319 | -2.821754 | -2.388651 |
| 1 | -1.025927 | -2.148953 | -2.795215 |
| 1 | -1.125686 | -3.666691 | -1.914371 |
| 1 | -1.462976 | -0.612892 | 2.975516  |

-----  
**P2<sub>DHA-S2</sub>**  
 -----

Number of imaginary frequencies : 0 Electronic energy : HF=-925.7518749  
 Zero-point correction= 0.355368 (Hartree/Particle)  
 Thermal correction to Energy= 0.375915  
 Thermal correction to Enthalpy= 0.376859  
 Thermal correction to Gibbs Free Energy= 0.304194  
 Sum of electronic and zero-point Energies= -925.396507  
 Sum of electronic and thermal Energies= -925.375960  
 Sum of electronic and thermal Enthalpies= -925.375015  
 Sum of electronic and thermal Free Energies= -925.447681

.....  
 Cartesian Coordinates  
 .....

|   |           |           |           |
|---|-----------|-----------|-----------|
| 6 | -0.068061 | -2.552581 | 0.362499  |
| 6 | 0.117588  | -1.580709 | 1.353954  |
| 6 | -0.942113 | -0.730782 | 1.671031  |
| 6 | -2.166509 | -0.850871 | 1.006307  |
| 6 | -2.344576 | -1.831148 | 0.031431  |
| 6 | -1.291618 | -2.690634 | -0.298414 |
| 6 | 1.438886  | -1.468963 | 2.072261  |
| 8 | -3.223944 | -0.025641 | 1.277286  |
| 6 | -1.483835 | -3.754836 | -1.351959 |
| 6 | 1.061685  | 2.120274  | 0.551270  |
| 6 | -0.224433 | 2.107361  | 0.002956  |
| 6 | -0.519772 | 1.200762  | -1.080945 |
| 6 | 0.479490  | 0.338083  | -1.538588 |
| 6 | 1.761620  | 0.337522  | -0.978606 |
| 6 | 2.065130  | 1.261069  | 0.087756  |
| 6 | -1.837450 | 1.195755  | -1.632432 |
| 6 | -2.810701 | 2.021947  | -1.141020 |
| 6 | -2.524259 | 2.910059  | -0.061778 |
| 6 | -1.270986 | 2.950458  | 0.492379  |
| 6 | 3.378391  | 1.250118  | 0.649426  |
| 6 | 4.329789  | 0.373218  | 0.199902  |
| 6 | 4.025084  | -0.549679 | -0.843186 |
| 6 | 2.779641  | -0.563564 | -1.414427 |
| 1 | -3.301008 | -1.892447 | -0.478015 |
| 1 | 0.247396  | -0.366460 | -2.332289 |
| 1 | 1.285886  | 2.807251  | 1.363941  |
| 1 | -2.882308 | 0.802425  | 1.641191  |
| 1 | 5.322599  | 0.372624  | 0.639388  |
| 1 | 4.789298  | -1.242153 | -1.182831 |
| 1 | -3.812235 | 1.996365  | -1.557647 |
| 1 | -3.308742 | 3.559480  | 0.315744  |
| 1 | -2.054979 | 0.502731  | -2.439513 |
| 1 | -1.047761 | 3.632421  | 1.308807  |
| 1 | 2.541735  | -1.266186 | -2.208203 |
| 1 | 3.605041  | 1.949762  | 1.449409  |
| 1 | 0.760191  | -3.204854 | 0.097148  |
| 1 | 1.526499  | -0.516450 | 2.599955  |
| 1 | 1.554094  | -2.273493 | 2.808990  |
| 1 | 2.275567  | -1.541126 | 1.372133  |
| 1 | -2.020006 | -4.621395 | -0.946129 |
| 1 | -2.071238 | -3.380269 | -2.196535 |
| 1 | -0.524526 | -4.112924 | -1.736306 |
| 1 | -0.811907 | 0.042687  | 2.423581  |

-----  
<sup>3</sup>TS(B-E)<sub>DHA-S1</sub>  
 -----

Number of imaginary frequencies : 1 Electronic energy : HF=-2837.3192727

|                                              |                             |
|----------------------------------------------|-----------------------------|
| Zero-point correction=                       | 1.104493 (Hartree/Particle) |
| Thermal correction to Energy=                | 1.170757                    |
| Thermal correction to Enthalpy=              | 1.171701                    |
| Thermal correction to Gibbs Free Energy=     | 0.999220                    |
| Sum of electronic and zero-point Energies=   | -2836.214597                |
| Sum of electronic and thermal Energies=      | -2836.148333                |
| Sum of electronic and thermal Enthalpies=    | -2836.147389                |
| Sum of electronic and thermal Free Energies= | -2836.319870                |

.....  
Cartesian Coordinates  
.....

|    |           |           |           |
|----|-----------|-----------|-----------|
| 6  | -0.785829 | -2.325275 | 2.560843  |
| 6  | 0.560348  | -1.914668 | 2.145277  |
| 6  | 1.461134  | -1.366500 | 3.164998  |
| 6  | 0.921950  | -0.805862 | 4.340038  |
| 6  | -0.569721 | -0.804121 | 4.578739  |
| 6  | -1.360015 | -1.759545 | 3.716520  |
| 6  | -2.414729 | 1.145584  | 2.109439  |
| 6  | -1.670737 | 0.300167  | 1.323888  |
| 6  | -0.266665 | 0.453665  | 1.148255  |
| 6  | 0.398607  | 1.454650  | 1.920154  |
| 6  | -0.315366 | 2.338563  | 2.680473  |
| 6  | -1.772850 | 2.284784  | 2.787357  |
| 77 | 0.465372  | 0.132915  | -1.012307 |
| 6  | 0.785740  | 0.455630  | -3.076768 |
| 6  | -3.836588 | 0.823110  | 2.371764  |
| 8  | -4.405450 | 0.166985  | 1.315905  |
| 6  | -5.719900 | -0.333826 | 1.571080  |
| 8  | -2.405096 | 3.158660  | 3.407110  |
| 7  | -0.501350 | -1.629757 | -1.357808 |
| 6  | 0.071933  | -2.879121 | -1.401630 |
| 6  | -0.943593 | -3.870918 | -1.713627 |
| 6  | -2.129024 | -3.195037 | -1.855022 |
| 6  | -1.840229 | -1.786695 | -1.649985 |
| 6  | -0.679881 | -5.336948 | -1.882869 |
| 6  | -0.077467 | -5.678917 | -3.257604 |
| 6  | 1.412936  | -3.147983 | -1.160653 |
| 6  | 2.404443  | -2.225991 | -0.848932 |
| 7  | 2.212649  | -0.866022 | -0.732711 |
| 6  | 3.438720  | -0.308558 | -0.428997 |
| 6  | 4.433722  | -1.357705 | -0.320637 |
| 6  | 3.795007  | -2.544757 | -0.585385 |
| 6  | -2.767321 | -0.758548 | -1.745002 |
| 6  | -2.525046 | 0.603519  | -1.604322 |
| 7  | -1.299215 | 1.158091  | -1.360682 |
| 6  | -1.479373 | 2.508908  | -1.224238 |
| 6  | -2.888756 | 2.830277  | -1.392907 |
| 6  | -3.537083 | 1.647007  | -1.631455 |
| 6  | -3.478795 | -3.744312 | -2.205784 |
| 6  | -3.826297 | -3.575583 | -3.695804 |
| 6  | 3.685325  | 1.047185  | -0.269318 |
| 6  | 2.772631  | 2.084500  | -0.419178 |
| 7  | 1.449562  | 1.922067  | -0.732319 |
| 6  | 0.874143  | 3.165685  | -0.735672 |
| 6  | 1.881396  | 4.168513  | -0.426289 |
| 6  | 3.060686  | 3.497407  | -0.230092 |
| 6  | 5.885711  | -1.128436 | -0.026102 |
| 6  | 6.683171  | -0.674281 | -1.262031 |
| 6  | 4.383321  | -3.921538 | -0.659130 |
| 6  | 4.673996  | -4.368170 | -2.103459 |



|   |           |           |           |
|---|-----------|-----------|-----------|
| 6 | -0.475188 | 3.426536  | -0.942934 |
| 6 | 1.631269  | 5.645751  | -0.392960 |
| 6 | 1.557689  | 6.269199  | -1.798496 |
| 6 | 4.419240  | 4.058898  | 0.062606  |
| 6 | 5.308700  | 4.147570  | -1.190638 |
| 6 | -3.460757 | 4.214017  | -1.337332 |
| 6 | -3.242793 | 5.002950  | -2.640982 |
| 6 | -4.992895 | 1.413804  | -1.892757 |
| 6 | -5.312191 | 1.230062  | -3.386779 |
| 8 | -4.440810 | 1.038757  | 3.400536  |
| 1 | -0.781894 | 4.462469  | -0.860465 |
| 1 | 4.698935  | 1.326878  | -0.007491 |
| 1 | 1.717245  | -4.186580 | -1.215868 |
| 1 | -3.793547 | -1.048800 | -1.934585 |
| 1 | 0.058202  | -0.142137 | -3.629764 |
| 1 | 0.661684  | 1.515185  | -3.301587 |
| 1 | 1.807063  | 0.133566  | -3.296277 |
| 1 | -5.324518 | 0.532871  | -1.331896 |
| 1 | -5.570787 | 2.255958  | -1.498290 |
| 1 | -4.759322 | 0.383124  | -3.805609 |
| 1 | -5.027123 | 2.120737  | -3.955175 |
| 1 | -4.245330 | -3.253129 | -1.593634 |
| 1 | -3.517741 | -4.807231 | -1.944157 |
| 1 | -1.614022 | -5.892683 | -1.749202 |
| 1 | -0.004165 | -5.687239 | -1.092588 |
| 1 | -4.533208 | 4.153938  | -1.125276 |
| 1 | -3.019041 | 4.762326  | -0.496735 |
| 1 | 3.704394  | -4.641096 | -0.185208 |
| 1 | 5.310654  | -3.952983 | -0.077450 |
| 1 | -6.380950 | 1.051357  | -3.543139 |
| 1 | 6.326364  | -2.049704 | 0.369604  |
| 1 | 5.986782  | -0.378763 | 0.768448  |
| 1 | 7.735080  | -0.504707 | -1.011264 |
| 1 | 6.274405  | 0.254004  | -1.672427 |
| 1 | 6.636370  | -1.431440 | -2.050607 |
| 1 | 5.388079  | -3.689883 | -2.580188 |
| 1 | 3.761092  | -4.361398 | -2.706761 |
| 1 | 5.092856  | -5.379197 | -2.126158 |
| 1 | 0.867309  | -5.149350 | -3.413804 |
| 1 | -0.758026 | -5.380965 | -4.060952 |
| 1 | 0.112194  | -6.753145 | -3.348516 |
| 1 | -4.821148 | -3.975484 | -3.916161 |
| 1 | -3.098942 | -4.100353 | -4.322680 |
| 1 | -3.809020 | -2.520399 | -3.984597 |
| 1 | -3.663834 | 6.010596  | -2.566309 |
| 1 | -3.718782 | 4.493489  | -3.484625 |
| 1 | -2.176704 | 5.094149  | -2.871652 |
| 1 | 2.425723  | 6.136165  | 0.179316  |
| 1 | 0.698799  | 5.851675  | 0.146693  |
| 1 | 1.365640  | 7.345355  | -1.742246 |
| 1 | 0.759500  | 5.809369  | -2.389260 |
| 1 | 2.497065  | 6.115533  | -2.338568 |
| 1 | 4.920042  | 3.444987  | 0.821602  |
| 1 | 4.313961  | 5.056025  | 0.502866  |
| 1 | 6.296364  | 4.551593  | -0.946211 |
| 1 | 4.849284  | 4.795215  | -1.943563 |
| 1 | 5.444666  | 3.161020  | -1.644659 |
| 1 | -2.168317 | -0.532313 | 0.845372  |
| 1 | 1.480700  | 1.520018  | 1.881337  |
| 1 | 0.172133  | 3.133272  | 3.237004  |

|   |           |           |          |
|---|-----------|-----------|----------|
| 1 | -6.030758 | -0.833499 | 0.652545 |
| 1 | -6.406993 | 0.479998  | 1.816049 |
| 1 | -5.705679 | -1.043267 | 2.402531 |
| 1 | 0.302272  | -0.841572 | 1.416759 |
| 1 | -0.775919 | -1.004804 | 5.637078 |
| 1 | 1.031996  | -2.546370 | 1.395187 |
| 1 | -0.948929 | 0.212286  | 4.398201 |
| 6 | 1.785930  | -0.215820 | 5.266269 |
| 6 | 2.846860  | -1.310385 | 2.938310 |
| 6 | 3.692056  | -0.710912 | 3.863724 |
| 1 | 4.761671  | -0.674180 | 3.678615 |
| 6 | 3.159365  | -0.160100 | 5.034423 |
| 1 | 3.812599  | 0.308986  | 5.764125 |
| 6 | -2.693005 | -2.045129 | 4.023897 |
| 6 | -1.559828 | -3.166851 | 1.743623 |
| 6 | -3.456433 | -2.872104 | 3.201347 |
| 1 | -4.492654 | -3.075948 | 3.454138 |
| 6 | -2.885466 | -3.438468 | 2.056349 |
| 1 | -3.473525 | -4.082899 | 1.409648 |
| 1 | 1.373332  | 0.213498  | 6.175721 |
| 1 | 3.248542  | -1.739584 | 2.026367 |
| 1 | -3.144390 | -1.590042 | 4.900883 |
| 1 | -1.115259 | -3.584079 | 0.847739 |

---

CSS<sup>TS(B-E)</sup><sub>DHA-S1</sub>

---

Number of imaginary frequencies : 1 Electronic energy : HF=-2837.3355241  
Zero-point correction= 1.106137 (Hartree/Particle)  
Thermal correction to Energy= 1.172086  
Thermal correction to Enthalpy= 1.173030  
Thermal correction to Gibbs Free Energy= 1.003105  
Sum of electronic and zero-point Energies= -2836.227278  
Sum of electronic and thermal Energies= -2836.161329  
Sum of electronic and thermal Enthalpies= -2836.160385  
Sum of electronic and thermal Free Energies= -2836.330310

.....  
Cartesian Coordinates

|    |           |           |           |
|----|-----------|-----------|-----------|
| 6  | 4.403743  | 1.447623  | -0.351976 |
| 6  | 3.329726  | 0.522739  | -0.681764 |
| 7  | 2.133659  | 1.189648  | -0.678272 |
| 6  | 2.394692  | 2.503747  | -0.378404 |
| 6  | 3.824938  | 2.676807  | -0.169560 |
| 6  | 3.488423  | -0.831790 | -0.949282 |
| 6  | 2.487953  | -1.745023 | -1.262601 |
| 7  | 1.146793  | -1.455021 | -1.350626 |
| 6  | 0.489457  | -2.625689 | -1.647590 |
| 6  | 1.452271  | -3.708187 | -1.740028 |
| 6  | 2.691527  | -3.162342 | -1.500455 |
| 6  | -0.887294 | -2.763204 | -1.784463 |
| 6  | -1.844220 | -1.763303 | -1.661645 |
| 7  | -1.573904 | -0.446328 | -1.397303 |
| 6  | -2.773735 | 0.214805  | -1.331078 |
| 6  | -3.859955 | -0.726930 | -1.551261 |
| 6  | -3.283914 | -1.955224 | -1.752937 |
| 77 | 0.281204  | 0.367666  | -1.018528 |
| 7  | -0.586179 | 2.203971  | -0.724682 |
| 6  | -1.933180 | 2.472007  | -0.721059 |
| 6  | -2.155063 | 3.851657  | -0.323377 |

|   |           |           |           |
|---|-----------|-----------|-----------|
| 6 | -0.917700 | 4.409071  | -0.127724 |
| 6 | 0.060699  | 3.364268  | -0.381115 |
| 6 | -3.952114 | -3.262288 | -2.054915 |
| 6 | -3.917394 | -3.621195 | -3.551222 |
| 6 | -5.310831 | -0.351085 | -1.582040 |
| 6 | -5.728754 | 0.300969  | -2.912334 |
| 6 | -2.933906 | 1.558276  | -1.020854 |
| 6 | 4.028539  | -3.840154 | -1.535169 |
| 6 | 4.773496  | -3.617308 | -2.863680 |
| 6 | 1.114817  | -5.124629 | -2.098042 |
| 6 | 0.895728  | -5.319322 | -3.609226 |
| 6 | 1.437732  | 3.500912  | -0.244910 |
| 6 | -0.583037 | 5.814140  | 0.269390  |
| 6 | -0.166124 | 6.687015  | -0.927811 |
| 6 | -3.507094 | 4.466862  | -0.130823 |
| 6 | -4.186814 | 4.866727  | -1.452100 |
| 6 | 4.491341  | 3.986402  | 0.126336  |
| 6 | 4.662167  | 4.862631  | -1.127818 |
| 6 | 5.856112  | 1.081493  | -0.295437 |
| 6 | 6.506232  | 0.996214  | -1.688128 |
| 6 | 0.010504  | 0.028593  | 1.132290  |
| 6 | -1.364347 | -0.246386 | 1.466823  |
| 6 | -2.137416 | 0.733600  | 2.011191  |
| 6 | -1.509761 | 1.986127  | 2.499029  |
| 6 | -0.033234 | 1.968983  | 2.549737  |
| 6 | 0.697137  | 0.979556  | 1.978164  |
| 6 | -3.612598 | 0.552407  | 2.029364  |
| 8 | -4.452688 | 1.398525  | 1.802417  |
| 8 | -2.151656 | 2.957383  | 2.899243  |
| 6 | 0.450766  | 0.857815  | -3.061282 |
| 8 | -3.919722 | -0.742487 | 2.300271  |
| 6 | -5.307931 | -1.081105 | 2.226111  |
| 6 | 1.064135  | -2.243282 | 1.849148  |
| 6 | -0.158394 | -2.911840 | 2.347158  |
| 6 | -0.665173 | -2.565185 | 3.612245  |
| 6 | 0.062600  | -1.548926 | 4.462511  |
| 6 | 1.534553  | -1.408527 | 4.147215  |
| 6 | 2.013732  | -1.747807 | 2.869273  |
| 1 | 1.799409  | 4.485683  | 0.026897  |
| 1 | 4.500252  | -1.218436 | -0.908141 |
| 1 | -1.254777 | -3.761550 | -1.992050 |
| 1 | -3.950454 | 1.920991  | -0.947267 |
| 1 | 1.129933  | 1.706743  | -3.186521 |
| 1 | 0.842260  | -0.003093 | -3.612925 |
| 1 | -0.534849 | 1.119201  | -3.458283 |
| 1 | -4.134948 | 3.762640  | 0.426448  |
| 1 | -3.409308 | 5.350887  | 0.507249  |
| 1 | -4.312580 | 4.002464  | -2.111977 |
| 1 | -3.584138 | 5.604522  | -1.991767 |
| 1 | -5.529419 | 0.336138  | -0.755738 |
| 1 | -5.922712 | -1.244187 | -1.411223 |
| 1 | -4.993299 | -3.224874 | -1.716637 |
| 1 | -3.474623 | -4.063527 | -1.476160 |
| 1 | -1.448994 | 6.264416  | 0.764745  |
| 1 | 0.221206  | 5.807603  | 1.015373  |
| 1 | 0.213208  | -5.443013 | -1.559117 |
| 1 | 1.917715  | -5.788137 | -1.759485 |
| 1 | -5.175176 | 5.300368  | -1.268770 |
| 1 | 3.897831  | -4.914817 | -1.368920 |
| 1 | 4.651270  | -3.480166 | -0.706484 |

|   |           |           |           |
|---|-----------|-----------|-----------|
| 1 | 5.749483  | -4.113184 | -2.856807 |
| 1 | 4.930887  | -2.550420 | -3.048384 |
| 1 | 4.192613  | -4.013724 | -3.701958 |
| 1 | 1.799582  | -5.054711 | -4.166264 |
| 1 | 0.086648  | -4.678211 | -3.971666 |
| 1 | 0.641471  | -6.358768 | -3.840271 |
| 1 | -2.887351 | -3.679130 | -3.916069 |
| 1 | -4.431690 | -2.856408 | -4.141034 |
| 1 | -4.402929 | -4.584500 | -3.738687 |
| 1 | -6.788610 | 0.574659  | -2.900823 |
| 1 | -5.558663 | -0.383993 | -3.748802 |
| 1 | -5.143580 | 1.205578  | -3.102584 |
| 1 | 0.079766  | 7.705046  | -0.608398 |
| 1 | -0.975417 | 6.743399  | -1.662282 |
| 1 | 0.708203  | 6.266428  | -1.434736 |
| 1 | 5.473139  | 3.802905  | 0.576135  |
| 1 | 3.911978  | 4.537752  | 0.877352  |
| 1 | 5.140910  | 5.815783  | -0.881086 |
| 1 | 3.693614  | 5.074416  | -1.590599 |
| 1 | 5.278251  | 4.351309  | -1.873800 |
| 1 | 5.976205  | 0.120355  | 0.220953  |
| 1 | 6.394476  | 1.818621  | 0.310038  |
| 1 | 7.561970  | 0.715350  | -1.615287 |
| 1 | 6.441757  | 1.960241  | -2.201670 |
| 1 | 5.996255  | 0.256892  | -2.313150 |
| 1 | -1.817746 | -1.170861 | 1.132658  |
| 1 | 1.781368  | 0.997314  | 1.990376  |
| 1 | 0.430636  | 2.828542  | 3.022617  |
| 1 | -5.371508 | -2.117738 | 2.557318  |
| 1 | -5.672282 | -0.989241 | 1.199917  |
| 1 | -5.901265 | -0.429775 | 2.872087  |
| 1 | 0.685611  | -1.235428 | 1.229072  |
| 1 | -0.074687 | -1.779897 | 5.524614  |
| 1 | 1.538992  | -2.756425 | 1.011321  |
| 1 | -0.412680 | -0.570671 | 4.304251  |
| 6 | 2.426948  | -0.892738 | 5.089070  |
| 6 | 3.364122  | -1.547485 | 2.551011  |
| 6 | 4.240260  | -1.017377 | 3.493381  |
| 1 | 5.283729  | -0.860201 | 3.237953  |
| 6 | 3.769830  | -0.692073 | 4.768140  |
| 1 | 4.447409  | -0.283348 | 5.511619  |
| 6 | -1.870505 | -3.126191 | 4.036570  |
| 6 | -0.860009 | -3.815209 | 1.536817  |
| 6 | -2.066361 | -4.360261 | 1.966662  |
| 1 | -2.607432 | -5.053015 | 1.329218  |
| 6 | -2.574524 | -4.011394 | 3.220032  |
| 1 | -3.514514 | -4.432190 | 3.564394  |
| 1 | 2.063524  | -0.636057 | 6.080685  |
| 1 | 3.710329  | -1.796183 | 1.553358  |
| 1 | -2.267976 | -2.856738 | 5.011345  |
| 1 | -0.457867 | -4.065057 | 0.561874  |

-----  
<sup>3</sup>TS(B-C)<sub>DHA-S1</sub>  
 -----

Number of imaginary frequencies : 1 Electronic energy : HF=-2837.3162758  
 Zero-point correction= 1.104064 (Hartree/Particle)  
 Thermal correction to Energy= 1.170189  
 Thermal correction to Enthalpy= 1.171133  
 Thermal correction to Gibbs Free Energy= 0.998480

|                                              |              |
|----------------------------------------------|--------------|
| Sum of electronic and zero-point Energies=   | -2836.212212 |
| Sum of electronic and thermal Energies=      | -2836.146087 |
| Sum of electronic and thermal Enthalpies=    | -2836.145142 |
| Sum of electronic and thermal Free Energies= | -2836.317796 |

.....  
 Cartesian Coordinates  
 .....

|    |           |           |           |
|----|-----------|-----------|-----------|
| 6  | 3.092285  | -0.969970 | 1.707247  |
| 6  | 4.319887  | -0.359066 | 1.447767  |
| 6  | 4.990726  | -0.570356 | 0.242901  |
| 6  | 4.410879  | -1.422821 | -0.724208 |
| 6  | 3.190690  | -2.062917 | -0.435772 |
| 6  | 2.530067  | -1.835009 | 0.763531  |
| 6  | 5.023523  | -1.537814 | -2.049946 |
| 6  | 6.455250  | -1.226999 | -2.172340 |
| 6  | 7.089409  | -0.439064 | -1.189682 |
| 6  | 6.281779  | 0.150293  | -0.060807 |
| 6  | 8.454890  | -0.172426 | -1.305160 |
| 6  | 9.193737  | -0.655633 | -2.384408 |
| 6  | 8.563696  | -1.423602 | -3.368649 |
| 6  | 7.207503  | -1.705743 | -3.258798 |
| 8  | 3.441696  | 0.045638  | -3.296879 |
| 6  | 2.374452  | 0.097102  | -2.533998 |
| 6  | 2.246887  | 0.959967  | -1.397577 |
| 6  | 1.083477  | 0.907212  | -0.622816 |
| 6  | 0.022072  | 0.050009  | -0.924798 |
| 6  | 0.128632  | -0.771858 | -2.059267 |
| 6  | 1.278857  | -0.758129 | -2.830226 |
| 77 | -1.650688 | -0.003847 | 0.349801  |
| 6  | -3.663395 | 0.292396  | 1.193932  |
| 7  | -0.659933 | -0.095540 | 2.113847  |
| 6  | -0.345217 | -1.237484 | 2.817402  |
| 6  | 0.364748  | -0.881471 | 4.031703  |
| 6  | 0.474993  | 0.486845  | 4.043692  |
| 6  | -0.170585 | 0.973662  | 2.839886  |
| 6  | 0.828984  | -1.863185 | 5.064949  |
| 6  | -0.306342 | -2.340637 | 5.988328  |
| 6  | -0.650654 | -2.530692 | 2.417638  |
| 6  | -1.345946 | -2.904903 | 1.275575  |
| 7  | -1.843816 | -2.033023 | 0.338372  |
| 6  | -2.499997 | -2.790191 | -0.609544 |
| 6  | -2.399213 | -4.197448 | -0.261776 |
| 6  | -1.682083 | -4.268908 | 0.904147  |
| 6  | -0.275301 | 2.306597  | 2.473177  |
| 6  | -0.896027 | 2.813397  | 1.336385  |
| 7  | -1.515842 | 2.052976  | 0.383853  |
| 6  | -1.963821 | 2.905829  | -0.593059 |
| 6  | -1.616766 | 4.274212  | -0.238767 |
| 6  | -0.953473 | 4.216410  | 0.959050  |
| 6  | 1.084984  | 1.361311  | 5.097195  |
| 6  | 0.037313  | 1.975137  | 6.043425  |
| 6  | -3.156671 | -2.288597 | -1.724195 |
| 6  | -3.268455 | -0.953345 | -2.102577 |
| 7  | -2.729316 | 0.098609  | -1.416975 |
| 6  | -3.015182 | 1.238352  | -2.118338 |
| 6  | -3.777352 | 0.896410  | -3.309354 |
| 6  | -3.938538 | -0.465619 | -3.297400 |
| 6  | -3.037261 | -5.314411 | -1.031662 |
| 6  | -4.540891 | -5.460099 | -0.734844 |
| 6  | -1.343624 | -5.481149 | 1.718215  |

|   |           |           |           |
|---|-----------|-----------|-----------|
| 6 | -2.305688 | -5.692599 | 2.901457  |
| 6 | -2.643990 | 2.524748  | -1.742595 |
| 6 | -4.319535 | 1.890487  | -4.291483 |
| 6 | -5.607653 | 2.573541  | -3.797202 |
| 6 | -4.697144 | -1.325556 | -4.262715 |
| 6 | -6.097235 | -1.706199 | -3.748225 |
| 6 | -1.991852 | 5.485033  | -1.038527 |
| 6 | -3.452129 | 5.917521  | -0.813527 |
| 6 | -0.412582 | 5.343343  | 1.785671  |
| 6 | -1.334152 | 5.721259  | 2.959263  |
| 1 | -2.925637 | 3.322500  | -2.420019 |
| 1 | -3.622320 | -3.016645 | -2.378171 |
| 1 | -0.317915 | -3.330665 | 3.068334  |
| 1 | 0.184704  | 3.028492  | 3.137447  |
| 1 | -3.494286 | 0.383203  | 2.268945  |
| 1 | -4.093888 | 1.199807  | 0.774467  |
| 1 | -4.247768 | -0.591760 | 0.938611  |
| 1 | 0.578596  | 5.074527  | 2.172457  |
| 1 | -0.259791 | 6.220879  | 1.148661  |
| 1 | -1.494062 | 4.866254  | 3.623508  |
| 1 | -2.314642 | 6.039269  | 2.591876  |
| 1 | 1.662597  | 2.164001  | 4.622492  |
| 1 | 1.803228  | 0.778028  | 5.683085  |
| 1 | 1.619473  | -1.407430 | 5.670419  |
| 1 | 1.288056  | -2.728784 | 4.571604  |
| 1 | -1.325279 | 6.313919  | -0.777754 |
| 1 | -1.829230 | 5.291187  | -2.105699 |
| 1 | -0.316280 | -5.400786 | 2.094189  |
| 1 | -1.361446 | -6.367827 | 1.075647  |
| 1 | -0.907109 | 6.538415  | 3.549504  |
| 1 | -2.529674 | -6.255535 | -0.794935 |
| 1 | -2.892683 | -5.155189 | -2.107339 |
| 1 | -4.980556 | -6.275284 | -1.318341 |
| 1 | -5.078932 | -4.537938 | -0.974919 |
| 1 | -4.705856 | -5.669885 | 0.326341  |
| 1 | -3.331652 | -5.825807 | 2.545131  |
| 1 | -2.300261 | -4.826763 | 3.570688  |
| 1 | -2.026495 | -6.577044 | 3.482916  |
| 1 | -1.106569 | -2.815487 | 5.412546  |
| 1 | -0.745812 | -1.495738 | 6.527296  |
| 1 | 0.062057  | -3.062909 | 6.723650  |
| 1 | 0.511487  | 2.615381  | 6.794081  |
| 1 | -0.518616 | 1.189581  | 6.564258  |
| 1 | -0.687287 | 2.577563  | 5.487150  |
| 1 | -3.700083 | 6.797536  | -1.415562 |
| 1 | -3.623917 | 6.162022  | 0.239230  |
| 1 | -4.144412 | 5.113260  | -1.081237 |
| 1 | -4.519215 | 1.388931  | -5.244373 |
| 1 | -3.561454 | 2.653860  | -4.505012 |
| 1 | -5.975284 | 3.299212  | -4.529750 |
| 1 | -5.434536 | 3.097984  | -2.852389 |
| 1 | -6.394312 | 1.833121  | -3.622674 |
| 1 | -4.127614 | -2.238943 | -4.475106 |
| 1 | -4.793476 | -0.801168 | -5.219305 |
| 1 | -6.623587 | -2.340515 | -4.468677 |
| 1 | -6.700724 | -0.810074 | -3.574447 |
| 1 | -6.031768 | -2.247180 | -2.799085 |
| 1 | 4.357318  | -0.625876 | -2.710662 |
| 1 | 6.893828  | 0.224934  | 0.846241  |
| 1 | 4.706911  | -2.416975 | -2.616448 |

|   |           |           |           |
|---|-----------|-----------|-----------|
| 1 | 6.023537  | 1.179430  | -0.350766 |
| 1 | 9.131760  | -1.803559 | -4.212518 |
| 1 | 10.254765 | -0.436343 | -2.457697 |
| 1 | 1.574974  | -2.308240 | 0.958333  |
| 1 | 2.571704  | -0.769942 | 2.636914  |
| 1 | 8.943609  | 0.425640  | -0.539774 |
| 1 | 6.711550  | -2.308063 | -4.015319 |
| 1 | 4.760296  | 0.303100  | 2.189724  |
| 1 | 2.753496  | -2.718979 | -1.181377 |
| 1 | -0.681297 | -1.440255 | -2.328302 |
| 1 | 1.028992  | 1.552546  | 0.240231  |
| 6 | 3.324442  | 1.902643  | -1.022816 |
| 8 | 4.392695  | 2.055176  | -1.585625 |
| 8 | 2.987428  | 2.639596  | 0.077045  |
| 6 | 3.986950  | 3.554730  | 0.522966  |
| 1 | 4.851214  | 3.018632  | 0.927477  |
| 1 | 4.325886  | 4.196506  | -0.293740 |
| 1 | 3.515884  | 4.147465  | 1.308470  |
| 1 | 1.386404  | -1.405060 | -3.695856 |

---

**OSS<sup>TS(B-C)</sup>DHA-SI**

---

Number of imaginary frequencies : 1 Electronic energy : HF=-2837.3185652  
 Zero-point correction= 1.104139 (Hartree/Particle)  
 Thermal correction to Energy= 1.170232  
 Thermal correction to Enthalpy= 1.171176  
 Thermal correction to Gibbs Free Energy= 0.999984  
 Sum of electronic and zero-point Energies= -2836.214426  
 Sum of electronic and thermal Energies= -2836.148333  
 Sum of electronic and thermal Enthalpies= -2836.147389  
 Sum of electronic and thermal Free Energies= -2836.318581

.....  
 Cartesian Coordinates  
 .....

|    |           |           |           |
|----|-----------|-----------|-----------|
| 6  | -9.265949 | -0.006527 | -1.906784 |
| 6  | -8.240551 | 0.902838  | -1.643439 |
| 6  | -6.993640 | 0.466489  | -1.196127 |
| 6  | -6.773210 | -0.911436 | -0.987911 |
| 6  | -7.809332 | -1.819502 | -1.263117 |
| 6  | -9.045190 | -1.374015 | -1.719470 |
| 6  | -5.466983 | -1.369662 | -0.497855 |
| 6  | -4.647322 | -0.413019 | 0.243849  |
| 6  | -4.820642 | 0.972656  | 0.017558  |
| 6  | -5.854593 | 1.434467  | -0.981751 |
| 6  | -3.976100 | 1.879621  | 0.653564  |
| 6  | -2.937697 | 1.438013  | 1.475194  |
| 6  | -2.752752 | 0.068767  | 1.690511  |
| 6  | -3.605417 | -0.845497 | 1.086515  |
| 8  | -3.795398 | -1.511265 | -2.427566 |
| 6  | -2.661710 | -1.135881 | -1.891097 |
| 6  | -1.777642 | -2.056980 | -1.237313 |
| 6  | -0.559124 | -1.615811 | -0.736609 |
| 6  | -0.211710 | -0.251788 | -0.720112 |
| 6  | -1.057494 | 0.646034  | -1.408601 |
| 6  | -2.248846 | 0.220220  | -1.963945 |
| 77 | 1.520145  | 0.361860  | 0.243206  |
| 6  | 3.604750  | 0.871150  | 0.666761  |
| 7  | 1.377497  | -0.914548 | 1.826124  |
| 6  | 0.846048  | -0.625852 | 3.059622  |

|   |           |           |           |
|---|-----------|-----------|-----------|
| 6 | 0.898797  | -1.807441 | 3.903698  |
| 6 | 1.481307  | -2.800927 | 3.160065  |
| 6 | 1.784167  | -2.231343 | 1.858223  |
| 6 | 0.450575  | -1.853507 | 5.333327  |
| 6 | 1.489071  | -1.260148 | 6.302722  |
| 6 | 0.355351  | 0.614417  | 3.444118  |
| 6 | 0.322913  | 1.769120  | 2.674200  |
| 7 | 0.739929  | 1.861064  | 1.366844  |
| 6 | 0.541986  | 3.168021  | 0.968058  |
| 6 | -0.028831 | 3.926987  | 2.065110  |
| 6 | -0.161827 | 3.062080  | 3.122830  |
| 6 | 2.382098  | -2.914455 | 0.808688  |
| 6 | 2.673853  | -2.415259 | -0.457267 |
| 7 | 2.409210  | -1.141389 | -0.873376 |
| 6 | 2.807541  | -1.041216 | -2.179824 |
| 6 | 3.350921  | -2.318224 | -2.618219 |
| 6 | 3.269638  | -3.170834 | -1.547655 |
| 6 | 1.822827  | -4.199138 | 3.579112  |
| 6 | 3.303314  | -4.360655 | 3.969115  |
| 6 | 0.849184  | 3.681354  | -0.283472 |
| 6 | 1.419234  | 2.996021  | -1.351989 |
| 7 | 1.757527  | 1.671780  | -1.336114 |
| 6 | 2.256624  | 1.357874  | -2.573008 |
| 6 | 2.236443  | 2.543113  | -3.417117 |
| 6 | 1.718758  | 3.561104  | -2.658175 |
| 6 | -0.334511 | 5.393881  | 2.020427  |
| 6 | 0.915771  | 6.269241  | 2.221646  |
| 6 | -0.655703 | 3.352274  | 4.508052  |
| 6 | 0.486874  | 3.543109  | 5.521847  |
| 6 | 2.722738  | 0.106314  | -2.959311 |
| 6 | 2.761006  | 2.601688  | -4.820057 |
| 6 | 4.294826  | 2.721504  | -4.877144 |
| 6 | 1.538096  | 5.002925  | -3.026041 |
| 6 | 2.664711  | 5.901313  | -2.484228 |
| 6 | 3.937618  | -2.577035 | -3.972959 |
| 6 | 5.378192  | -2.050848 | -4.107345 |
| 6 | 3.735414  | -4.591656 | -1.445695 |
| 6 | 5.094048  | -4.725663 | -0.734530 |
| 1 | 3.072781  | 0.019256  | -3.981276 |
| 1 | 0.621526  | 4.728455  | -0.445414 |
| 1 | -0.031038 | 0.693108  | 4.453341  |
| 1 | 2.633502  | -3.952894 | 0.988841  |
| 1 | 4.170500  | 0.919543  | -0.263163 |
| 1 | 3.588007  | 1.845465  | 1.161686  |
| 1 | 4.000661  | 0.093935  | 1.323893  |
| 1 | 2.984988  | -5.189779 | -0.913649 |
| 1 | 3.808523  | -5.023136 | -2.449576 |
| 1 | 5.047664  | -4.316589 | 0.279481  |
| 1 | 5.868256  | -4.173438 | -1.275910 |
| 1 | 1.581639  | -4.898750 | 2.769214  |
| 1 | 1.192366  | -4.488896 | 4.426452  |
| 1 | 0.243349  | -2.890892 | 5.616746  |
| 1 | -0.498725 | -1.314827 | 5.442436  |
| 1 | 3.925496  | -3.653333 | -4.175254 |
| 1 | 3.308266  | -2.117512 | -4.744761 |
| 1 | -1.310656 | 2.539204  | 4.844700  |
| 1 | -1.278034 | 4.253182  | 4.490980  |
| 1 | 5.403033  | -5.773804 | -0.667508 |
| 1 | -1.072819 | 5.635415  | 2.792433  |
| 1 | -0.805166 | 5.646080  | 1.062247  |



|   |            |           |           |
|---|------------|-----------|-----------|
| 1 | 0.663732   | 7.333397  | 2.173292  |
| 1 | 1.667721   | 6.059405  | 1.454882  |
| 1 | 1.373791   | 6.068863  | 3.194997  |
| 1 | 1.125060   | 4.382750  | 5.230096  |
| 1 | 1.119277   | 2.651535  | 5.571868  |
| 1 | 0.094396   | 3.742110  | 6.524111  |
| 1 | 1.707477   | -0.217454 | 6.052576  |
| 1 | 2.430265   | -1.815384 | 6.246482  |
| 1 | 1.129609   | -1.296986 | 7.336039  |
| 1 | 3.523959   | -5.392751 | 4.259759  |
| 1 | 3.554164   | -3.706412 | 4.809560  |
| 1 | 3.959589   | -4.091331 | 3.135944  |
| 1 | 5.777060   | -2.244067 | -5.108356 |
| 1 | 6.034726   | -2.533484 | -3.376915 |
| 1 | 5.419442   | -0.972743 | -3.923953 |
| 1 | 2.312339   | 3.454146  | -5.341164 |
| 1 | 2.444774   | 1.708823  | -5.373064 |
| 1 | 4.649700   | 2.752034  | -5.912297 |
| 1 | 4.772256   | 1.874005  | -4.375773 |
| 1 | 4.629539   | 3.632855  | -4.372303 |
| 1 | 0.572802   | 5.365015  | -2.650610 |
| 1 | 1.492599   | 5.097717  | -4.116157 |
| 1 | 2.501508   | 6.948365  | -2.759102 |
| 1 | 3.633587   | 5.587956  | -2.884770 |
| 1 | 2.724768   | 5.838527  | -1.393284 |
| 1 | -4.698578  | -1.522516 | -1.562020 |
| 1 | -6.236994  | 2.424372  | -0.708235 |
| 1 | -5.433750  | -2.394157 | -0.128049 |
| 1 | -5.343102  | 1.570585  | -1.949840 |
| 1 | -1.934081  | -0.275879 | 2.311698  |
| 1 | -2.272635  | 2.156828  | 1.939417  |
| 1 | -9.837965  | -2.087679 | -1.923124 |
| 1 | -10.231076 | 0.349334  | -2.254640 |
| 1 | -4.113411  | 2.944799  | 0.482520  |
| 1 | -3.467690  | -1.911608 | 1.233157  |
| 1 | -8.409762  | 1.966907  | -1.790286 |
| 1 | -7.632330  | -2.880109 | -1.107148 |
| 1 | -0.800396  | 1.697294  | -1.461685 |
| 1 | 0.091707   | -2.346574 | -0.277545 |
| 6 | -2.198349  | -3.457467 | -0.992094 |
| 8 | -3.330572  | -3.832012 | -0.749435 |
| 8 | -1.140865  | -4.310320 | -1.008727 |
| 6 | -1.454355  | -5.665563 | -0.669828 |
| 1 | -1.879454  | -5.725759 | 0.336001  |
| 1 | -2.174553  | -6.084866 | -1.376885 |
| 1 | -0.509761  | -6.207891 | -0.719388 |
| 1 | -2.921359  | 0.915976  | -2.455463 |

-----  
 CSS<sub>EDHA-S1</sub>  
 -----

Number of imaginary frequencies : 1 Electronic energy : HF=-2837.4326677  
 Zero-point correction= 1.108332 (Hartree/Particle)  
 Thermal correction to Energy= 1.174282  
 Thermal correction to Enthalpy= 1.175227  
 Thermal correction to Gibbs Free Energy= 1.005033  
 Sum of electronic and zero-point Energies= -2836.324336  
 Sum of electronic and thermal Energies= -2836.258385  
 Sum of electronic and thermal Enthalpies= -2836.257441  
 Sum of electronic and thermal Free Energies= -2836.427635

.....  
 Cartesian Coordinates  
 .....

|    |           |           |           |
|----|-----------|-----------|-----------|
| 6  | 3.610267  | -0.054649 | 4.283916  |
| 6  | 2.835908  | -1.017851 | 3.636248  |
| 6  | 3.289581  | -1.539315 | 2.388217  |
| 6  | 4.516725  | -1.085061 | 1.834317  |
| 6  | 5.267989  | -0.136631 | 2.498146  |
| 6  | 4.809641  | 0.380397  | 3.724460  |
| 6  | 2.517655  | -2.512873 | 1.720974  |
| 6  | 1.339206  | -3.062877 | 2.256527  |
| 6  | 0.855901  | -2.596843 | 3.517380  |
| 6  | 1.500971  | -1.419462 | 4.159229  |
| 6  | -0.293581 | -3.175501 | 4.051536  |
| 6  | -0.960691 | -4.184845 | 3.361635  |
| 6  | -0.496540 | -4.643382 | 2.114087  |
| 6  | 0.640454  | -4.090550 | 1.563980  |
| 6  | -0.012339 | 0.680024  | 2.266772  |
| 6  | -1.067089 | -0.215902 | 2.086383  |
| 6  | -2.399266 | 0.123120  | 2.363957  |
| 6  | -2.735240 | 1.478043  | 2.816318  |
| 6  | -1.587351 | 2.353914  | 3.026863  |
| 6  | -0.296540 | 1.979302  | 2.756550  |
| 6  | -3.453345 | -0.883037 | 2.185844  |
| 8  | -4.662818 | -0.716182 | 2.248331  |
| 8  | -3.898780 | 1.895898  | 3.035503  |
| 8  | -2.933805 | -2.132722 | 1.951269  |
| 6  | -3.892515 | -3.180236 | 1.815587  |
| 77 | 0.003113  | 0.462143  | -0.954462 |
| 6  | 0.037692  | 0.813226  | -2.975645 |
| 7  | 1.281930  | -1.125358 | -1.272940 |
| 6  | 2.655788  | -1.059991 | -1.365326 |
| 6  | 3.181807  | -2.366987 | -1.721934 |
| 6  | 2.102496  | -3.212139 | -1.837044 |
| 6  | 0.915519  | -2.418426 | -1.566169 |
| 6  | 4.628977  | -2.671674 | -1.974638 |
| 6  | 5.090076  | -2.252534 | -3.381143 |
| 6  | 3.415893  | 0.078541  | -1.127284 |
| 6  | 2.946103  | 1.343784  | -0.793057 |
| 7  | 1.618766  | 1.694587  | -0.691075 |
| 6  | 1.576971  | 3.035132  | -0.383980 |
| 6  | 2.931960  | 3.549317  | -0.255750 |
| 6  | 3.780619  | 2.500836  | -0.510204 |
| 6  | -0.395543 | -2.884375 | -1.611550 |
| 6  | -1.554906 | -2.141740 | -1.429203 |
| 7  | -1.598565 | -0.790638 | -1.163228 |
| 6  | -2.923639 | -0.440391 | -1.065666 |
| 6  | -3.757818 | -1.612601 | -1.282008 |
| 6  | -2.909936 | -2.667798 | -1.501416 |
| 6  | 2.096313  | -4.661591 | -2.223871 |
| 6  | 1.769038  | -4.886666 | -3.709867 |
| 6  | 0.414679  | 3.780734  | -0.223232 |
| 6  | -0.892907 | 3.322454  | -0.321534 |
| 7  | -1.257848 | 2.025702  | -0.599468 |
| 6  | -2.630817 | 1.972277  | -0.549782 |
| 6  | -3.160437 | 3.284211  | -0.208554 |
| 6  | -2.084082 | 4.123546  | -0.078253 |
| 6  | 3.280894  | 4.977102  | 0.043520  |
| 6  | 3.215475  | 5.882614  | -1.198502 |
| 6  | 5.280274  | 2.505290  | -0.549032 |

|   |           |           |           |
|---|-----------|-----------|-----------|
| 6 | 5.846677  | 2.608113  | -1.975566 |
| 6 | -3.393009 | 0.833469  | -0.769357 |
| 6 | -4.616448 | 3.586150  | -0.016998 |
| 6 | -5.393181 | 3.727773  | -1.336561 |
| 6 | -2.073855 | 5.587609  | 0.245444  |
| 6 | -1.870725 | 6.476498  | -0.993519 |
| 6 | -5.257174 | -1.599429 | -1.272912 |
| 6 | -5.865363 | -1.014250 | -2.558888 |
| 6 | -3.255644 | -4.097649 | -1.793250 |
| 6 | -3.206421 | -4.436715 | -3.292794 |
| 1 | -4.466319 | 0.945071  | -0.679950 |
| 1 | 0.542182  | 4.828976  | 0.021336  |
| 1 | 4.490483  | -0.031910 | -1.208227 |
| 1 | -0.526897 | -3.937795 | -1.830877 |
| 1 | -0.582169 | 1.685113  | -3.210425 |
| 1 | 1.065707  | 1.005281  | -3.300862 |
| 1 | -0.351898 | -0.058672 | -3.511664 |
| 1 | -2.569430 | -4.760328 | -1.251334 |
| 1 | -4.258037 | -4.313255 | -1.408673 |
| 1 | -2.211882 | -4.243436 | -3.707465 |
| 1 | -3.923000 | -3.826234 | -3.851886 |
| 1 | 1.367969  | -5.205885 | -1.609823 |
| 1 | 3.074666  | -5.100785 | -2.000635 |
| 1 | 4.802916  | -3.745127 | -1.843864 |
| 1 | 5.255592  | -2.165227 | -1.230185 |
| 1 | -5.626727 | -2.621610 | -1.136840 |
| 1 | -5.607578 | -1.027255 | -0.406069 |
| 1 | 5.664674  | 1.595122  | -0.072889 |
| 1 | 5.654719  | 3.344454  | 0.047013  |
| 1 | -3.448711 | -5.491124 | -3.465261 |
| 1 | 4.289658  | 5.022604  | 0.468018  |
| 1 | 2.604477  | 5.370607  | 0.811818  |
| 1 | 3.463772  | 6.918097  | -0.941317 |
| 1 | 2.213963  | 5.872311  | -1.640217 |
| 1 | 3.919960  | 5.542643  | -1.964673 |
| 1 | 5.519979  | 3.535586  | -2.456915 |
| 1 | 5.504536  | 1.774193  | -2.596685 |
| 1 | 6.942106  | 2.597261  | -1.963626 |
| 1 | 4.941892  | -1.179510 | -3.538693 |
| 1 | 4.520130  | -2.783018 | -4.150718 |
| 1 | 6.152408  | -2.475999 | -3.527603 |
| 1 | 1.758926  | -5.955180 | -3.950795 |
| 1 | 2.512830  | -4.399563 | -4.348691 |
| 1 | 0.789337  | -4.469996 | -3.963707 |
| 1 | -6.959536 | -1.013009 | -2.507274 |
| 1 | -5.565654 | -1.600644 | -3.433951 |
| 1 | -5.532463 | 0.015891  | -2.720188 |
| 1 | -4.716525 | 4.512572  | 0.558127  |
| 1 | -5.061340 | 2.796754  | 0.599257  |
| 1 | -6.451467 | 3.936629  | -1.145566 |
| 1 | -5.332173 | 2.813177  | -1.935015 |
| 1 | -4.988672 | 4.546447  | -1.941546 |
| 1 | -1.281338 | 5.798081  | 0.974163  |
| 1 | -3.017379 | 5.857174  | 0.731082  |
| 1 | -1.855961 | 7.536520  | -0.717246 |
| 1 | -2.678258 | 6.324077  | -1.717251 |
| 1 | -0.926730 | 6.242944  | -1.496427 |
| 1 | -1.817671 | 3.353723  | 3.386037  |
| 1 | 1.486159  | -1.482319 | 5.251700  |
| 1 | 2.861826  | -2.874421 | 0.756537  |

|   |           |           |          |
|---|-----------|-----------|----------|
| 1 | 0.822809  | -0.560491 | 3.912753 |
| 1 | 6.206663  | 0.211636  | 2.080615 |
| 1 | 5.400426  | 1.128729  | 4.243780 |
| 1 | -1.856874 | -4.620669 | 3.791123 |
| 1 | -1.034648 | -5.426374 | 1.590414 |
| 1 | -0.679274 | -2.820700 | 5.002228 |
| 1 | 1.021882  | -4.425822 | 0.606452 |
| 1 | 3.268532  | 0.358505  | 5.228140 |
| 1 | 4.848443  | -1.504549 | 0.891837 |
| 1 | 0.996599  | 0.408491  | 1.981289 |
| 1 | -4.382367 | -3.386905 | 2.773677 |
| 1 | -4.658229 | -2.930593 | 1.080674 |
| 1 | -3.334398 | -4.058447 | 1.490887 |
| 1 | 0.518699  | 2.684643  | 2.900620 |
| 1 | -0.858599 | -1.214483 | 1.724765 |

-----  
**PIDHA-SI**  
 -----

Number of imaginary frequencies : 0 Electronic energy : HF=-1074.9551918  
 Zero-point correction= 0.345405 (Hartree/Particle)  
 Thermal correction to Energy= 0.365798  
 Thermal correction to Enthalpy= 0.366742  
 Thermal correction to Gibbs Free Energy= 0.295126  
 Sum of electronic and zero-point Energies= -1074.609787  
 Sum of electronic and thermal Energies= -1074.589394  
 Sum of electronic and thermal Enthalpies= -1074.588450  
 Sum of electronic and thermal Free Energies= -1074.660066

.....  
 Cartesian Coordinates  
 .....

|   |           |           |           |
|---|-----------|-----------|-----------|
| 6 | -4.385576 | 0.946206  | -1.222142 |
| 6 | -3.361999 | 0.043619  | -1.498861 |
| 6 | -2.321240 | -0.167048 | -0.587078 |
| 6 | -2.311618 | 0.535468  | 0.627445  |
| 6 | -3.347376 | 1.436359  | 0.900047  |
| 6 | -4.376021 | 1.648075  | -0.014971 |
| 6 | -1.190440 | 0.328996  | 1.619290  |
| 6 | -0.534290 | -1.027093 | 1.509081  |
| 6 | -0.554336 | -1.729799 | 0.295507  |
| 6 | -1.197945 | -1.121144 | -0.929657 |
| 6 | 0.044544  | -2.992866 | 0.223964  |
| 6 | 0.679654  | -3.549936 | 1.330320  |
| 6 | 0.713385  | -2.842986 | 2.533385  |
| 6 | 0.101327  | -1.595244 | 2.618153  |
| 6 | -0.124470 | -0.389861 | -1.861550 |
| 6 | 0.498801  | 0.751717  | -1.134612 |
| 6 | 1.793637  | 0.788483  | -0.768711 |
| 6 | 2.718472  | -0.331435 | -1.119919 |
| 6 | 2.164698  | -1.346830 | -2.042961 |
| 6 | 0.871548  | -1.369738 | -2.390167 |
| 8 | 3.853380  | -0.425253 | -0.674807 |
| 1 | 2.872256  | -2.092079 | -2.392550 |
| 1 | -1.569287 | 0.473520  | 2.637133  |
| 1 | -1.603339 | -1.926984 | -1.552612 |
| 1 | -0.426822 | 1.106033  | 1.471295  |
| 1 | 1.142912  | -4.528754 | 1.255564  |
| 1 | 1.205167  | -3.266863 | 3.403563  |
| 1 | -5.171719 | 2.349903  | 0.215731  |
| 1 | -5.188187 | 1.095815  | -1.937713 |

|   |           |           |           |
|---|-----------|-----------|-----------|
| 1 | -3.344409 | 1.973343  | 1.845177  |
| 1 | -3.368421 | -0.512727 | -2.433470 |
| 1 | 0.111197  | -1.049464 | 3.558099  |
| 1 | 0.013678  | -3.542075 | -0.712434 |
| 1 | -0.718760 | 0.010975  | -2.695413 |
| 6 | 2.341626  | 1.970140  | -0.042284 |
| 8 | 3.463907  | 2.406778  | -0.144831 |
| 8 | 1.393914  | 2.540510  | 0.753932  |
| 6 | 1.822462  | 3.725149  | 1.442156  |
| 1 | 2.670775  | 3.502366  | 2.093546  |
| 1 | 2.121283  | 4.497676  | 0.729371  |
| 1 | 0.963040  | 4.052646  | 2.026759  |
| 1 | -0.157568 | 1.571459  | -0.862221 |
| 1 | 0.489536  | -2.152457 | -3.042799 |

-----  
**P2DHA-SI**  
 -----

Number of imaginary frequencies : 0 Electronic energy : HF=-1075.0068239  
 Zero-point correction= 0.344284 (Hartree/Particle)  
 Thermal correction to Energy= 0.365170  
 Thermal correction to Enthalpy= 0.366114  
 Thermal correction to Gibbs Free Energy= 0.293244  
 Sum of electronic and zero-point Energies= -1074.662540  
 Sum of electronic and thermal Energies= -1074.641654  
 Sum of electronic and thermal Enthalpies= -1074.640709  
 Sum of electronic and thermal Free Energies= -1074.713580

.....  
 Cartesian Coordinates  
 .....

|   |           |           |           |
|---|-----------|-----------|-----------|
| 6 | -2.217952 | 0.338107  | 2.218815  |
| 6 | -1.748373 | -0.748791 | 1.501837  |
| 6 | -0.368994 | -1.007092 | 1.407036  |
| 6 | 0.550894  | -0.139542 | 2.047000  |
| 6 | 0.062717  | 0.960891  | 2.770591  |
| 6 | -1.301700 | 1.190241  | 2.854305  |
| 8 | 1.878264  | -0.314899 | 1.985376  |
| 6 | 0.246360  | -0.257290 | -1.836356 |
| 6 | 1.431127  | 0.333131  | -1.382212 |
| 6 | 1.364205  | 1.594201  | -0.684353 |
| 6 | 0.115407  | 2.188162  | -0.471183 |
| 6 | -1.070197 | 1.589119  | -0.909060 |
| 6 | -1.003181 | 0.328815  | -1.608687 |
| 6 | 2.576090  | 2.180313  | -0.209403 |
| 6 | 3.780262  | 1.558542  | -0.402169 |
| 6 | 3.845279  | 0.307528  | -1.081477 |
| 6 | 2.706070  | -0.285516 | -1.556937 |
| 6 | -2.222443 | -0.295560 | -2.010207 |
| 6 | -3.432843 | 0.291974  | -1.750520 |
| 6 | -3.498219 | 1.545865  | -1.076478 |
| 6 | -2.351057 | 2.171860  | -0.667225 |
| 1 | 0.783169  | 1.616130  | 3.247407  |
| 1 | 0.063499  | 3.130903  | 0.067140  |
| 1 | 0.297329  | -1.207424 | -2.362171 |
| 1 | 2.039718  | -1.111763 | 1.425835  |
| 1 | -4.352614 | -0.195790 | -2.059388 |
| 1 | -4.466400 | 1.997545  | -0.882543 |
| 1 | 4.693967  | 2.010353  | -0.028519 |
| 1 | 4.807675  | -0.177209 | -1.214671 |
| 1 | 2.519577  | 3.127372  | 0.320009  |

|   |           |           |           |
|---|-----------|-----------|-----------|
| 1 | 2.750014  | -1.245984 | -2.061643 |
| 1 | -2.395033 | 3.120902  | -0.140359 |
| 1 | -2.169478 | -1.253440 | -2.519920 |
| 1 | -3.282161 | 0.537107  | 2.273738  |
| 6 | 0.155283  | -2.134788 | 0.634982  |
| 8 | 1.351871  | -2.421951 | 0.545906  |
| 8 | -0.790405 | -2.860828 | 0.010307  |
| 6 | -0.305429 | -3.960906 | -0.770674 |
| 1 | 0.354298  | -3.604283 | -1.565765 |
| 1 | 0.248035  | -4.665323 | -0.145535 |
| 1 | -1.192395 | -4.433597 | -1.191503 |
| 1 | -2.434268 | -1.407423 | 0.984217  |
| 1 | -1.662612 | 2.047789  | 3.415213  |

---

AcI

---

Number of imaginary frequencies : 0 Electronic energy : HF=-2826.3381847  
 Zero-point correction= 0.866159 (Hartree/Particle)  
 Thermal correction to Energy= 0.922681  
 Thermal correction to Enthalpy= 0.923626  
 Thermal correction to Gibbs Free Energy= 0.773636  
 Sum of electronic and zero-point Energies= -2825.472026  
 Sum of electronic and thermal Energies= -2825.415503  
 Sum of electronic and thermal Enthalpies= -2825.414559  
 Sum of electronic and thermal Free Energies= -2825.564549

---

Cartesian Coordinates

---

|    |           |           |           |
|----|-----------|-----------|-----------|
| 6  | 1.513408  | -3.787492 | -0.594100 |
| 6  | 0.356542  | -2.925681 | -0.404726 |
| 7  | 0.752329  | -1.613183 | -0.451882 |
| 6  | 2.099897  | -1.601878 | -0.712585 |
| 6  | 2.596020  | -2.966853 | -0.771201 |
| 6  | -0.941914 | -3.360938 | -0.175007 |
| 6  | -2.058582 | -2.569184 | 0.060990  |
| 7  | -2.056813 | -1.197926 | 0.139966  |
| 6  | -3.351774 | -0.794742 | 0.350276  |
| 6  | -4.212096 | -1.962826 | 0.443764  |
| 6  | -3.410836 | -3.061788 | 0.264788  |
| 6  | -3.776145 | 0.525159  | 0.441027  |
| 6  | -2.991768 | 1.665691  | 0.320486  |
| 7  | -1.630248 | 1.673351  | 0.119533  |
| 6  | -1.230533 | 2.987366  | 0.061990  |
| 6  | -2.382669 | 3.850491  | 0.255414  |
| 6  | -3.473308 | 3.032320  | 0.409519  |
| 77 | -0.437410 | 0.028115  | -0.160729 |
| 7  | 1.179508  | 1.257120  | -0.480797 |
| 6  | 1.181728  | 2.628744  | -0.431518 |
| 6  | 2.521816  | 3.119313  | -0.712123 |
| 6  | 3.306461  | 2.018091  | -0.947484 |
| 6  | 2.451256  | 0.853404  | -0.797258 |
| 6  | -4.912725 | 3.419620  | 0.568339  |
| 6  | -5.701472 | 3.326189  | -0.750503 |
| 6  | -2.343760 | 5.348171  | 0.200573  |
| 6  | -2.320709 | 5.888306  | -1.240969 |
| 6  | 0.071379  | 3.419807  | -0.160185 |
| 6  | -3.811940 | -4.504639 | 0.194156  |
| 6  | -3.953996 | -5.010241 | -1.253105 |
| 6  | -5.700605 | -1.914126 | 0.616067  |

|    |           |           |           |
|----|-----------|-----------|-----------|
| 6  | -6.440483 | -1.610549 | -0.699647 |
| 6  | 2.873746  | -0.465309 | -0.889534 |
| 6  | 4.749462  | 1.959003  | -1.350852 |
| 6  | 4.934613  | 1.683091  | -2.853979 |
| 6  | 2.899533  | 4.567351  | -0.801215 |
| 6  | 2.514280  | 5.199103  | -2.151170 |
| 6  | 4.036248  | -3.331585 | -0.961043 |
| 6  | 4.494455  | -3.248344 | -2.427691 |
| 6  | 1.468802  | -5.285051 | -0.612279 |
| 6  | 1.004159  | -5.848317 | -1.967431 |
| 6  | 0.100364  | -0.132010 | 2.228148  |
| 6  | 1.447394  | 0.426884  | 2.262490  |
| 6  | 2.528999  | -0.386185 | 2.302291  |
| 6  | 2.381234  | -1.858246 | 2.456758  |
| 6  | 0.997366  | -2.341496 | 2.639588  |
| 6  | -0.082438 | -1.542875 | 2.572111  |
| 7  | -0.863561 | 0.717089  | 2.698316  |
| 7  | -1.675253 | 1.456887  | 2.941908  |
| 8  | 3.331065  | -2.633913 | 2.478595  |
| 6  | 3.879771  | 0.218987  | 2.119859  |
| 8  | 4.827164  | -0.305041 | 1.576271  |
| 17 | -0.913793 | 0.076174  | -2.468321 |
| 8  | 3.908848  | 1.479837  | 2.620352  |
| 6  | 5.122726  | 2.208328  | 2.388736  |
| 1  | 3.927000  | -0.624645 | -1.077278 |
| 1  | -1.100806 | -4.432871 | -0.180903 |
| 1  | -4.834132 | 0.682741  | 0.613857  |
| 1  | 0.231892  | 4.491612  | -0.152749 |
| 1  | 2.422917  | 5.128415  | 0.012383  |
| 1  | 3.979288  | 4.672076  | -0.648522 |
| 1  | 1.437380  | 5.118223  | -2.326974 |
| 1  | 3.019976  | 4.685146  | -2.973966 |
| 1  | -1.463744 | 5.718500  | 0.741162  |
| 1  | -3.214417 | 5.755378  | 0.725884  |
| 1  | -4.974606 | 4.442342  | 0.955541  |
| 1  | -5.389230 | 2.780918  | 1.322586  |
| 1  | 5.237609  | 2.907449  | -1.098748 |
| 1  | 5.261891  | 1.183774  | -0.768634 |
| 1  | -5.965173 | -1.156451 | 1.364239  |
| 1  | -6.052991 | -2.870854 | 1.016614  |
| 1  | 2.790383  | 6.258023  | -2.184611 |
| 1  | -4.761430 | -4.645673 | 0.721923  |
| 1  | -3.076091 | -5.122855 | 0.723456  |
| 1  | -4.234728 | -6.068167 | -1.274828 |
| 1  | -3.015273 | -4.891265 | -1.802099 |
| 1  | -4.719990 | -4.439815 | -1.786773 |
| 1  | -6.232254 | -2.383176 | -1.445628 |
| 1  | -6.114653 | -0.654260 | -1.119480 |
| 1  | -7.522994 | -1.567157 | -0.541907 |
| 1  | -5.666427 | 2.310569  | -1.155782 |
| 1  | -5.272666 | 3.993740  | -1.503779 |
| 1  | -6.750458 | 3.602512  | -0.602732 |
| 1  | -2.278663 | 6.982247  | -1.251383 |
| 1  | -3.216384 | 5.573284  | -1.784495 |
| 1  | -1.454248 | 5.504749  | -1.787883 |
| 1  | 5.996350  | 1.634681  | -3.115777 |
| 1  | 4.467236  | 2.471162  | -3.452141 |
| 1  | 4.467564  | 0.735425  | -3.137248 |
| 1  | 4.200252  | -4.347697 | -0.587908 |
| 1  | 4.650552  | -2.677914 | -0.331380 |

|   |           |           |           |
|---|-----------|-----------|-----------|
| 1 | 5.553476  | -3.508775 | -2.522436 |
| 1 | 4.354286  | -2.240584 | -2.830882 |
| 1 | 3.915356  | -3.933700 | -3.054721 |
| 1 | 0.803503  | -5.648421 | 0.181000  |
| 1 | 2.462959  | -5.678396 | -0.376459 |
| 1 | 0.971679  | -6.942557 | -1.949879 |
| 1 | 1.684342  | -5.536903 | -2.765863 |
| 1 | 0.006573  | -5.478944 | -2.224712 |
| 1 | 1.558720  | 1.499193  | 2.168027  |
| 1 | -1.093560 | -1.918397 | 2.672500  |
| 1 | 0.894016  | -3.407980 | 2.803635  |
| 1 | 5.990460  | 1.609265  | 2.671096  |
| 1 | 5.051209  | 3.103535  | 3.006215  |
| 1 | 5.201306  | 2.481867  | 1.334397  |

-----  
**TS(A-B)<sub>Cl</sub>**  
 -----

Number of imaginary frequencies : 1 Electronic energy : HF=-2826.3335068  
 Zero-point correction= 0.864644 (Hartree/Particle)  
 Thermal correction to Energy= 0.920574  
 Thermal correction to Enthalpy= 0.921518  
 Thermal correction to Gibbs Free Energy= 0.774056  
 Sum of electronic and zero-point Energies= -2825.468863  
 Sum of electronic and thermal Energies= -2825.412933  
 Sum of electronic and thermal Enthalpies= -2825.411989  
 Sum of electronic and thermal Free Energies= -2825.559451

.....  
 Cartesian Coordinates  
 .....

|    |           |           |           |
|----|-----------|-----------|-----------|
| 6  | 1.493661  | 0.385052  | 2.166550  |
| 6  | 0.138092  | -0.151778 | 1.955528  |
| 6  | -0.087343 | -1.506192 | 2.494464  |
| 6  | 0.954477  | -2.338996 | 2.647286  |
| 6  | 2.356175  | -1.911214 | 2.440904  |
| 6  | 2.554242  | -0.444183 | 2.273921  |
| 77 | -0.433197 | 0.039809  | -0.073960 |
| 17 | -0.922462 | 0.083415  | -2.446007 |
| 8  | 3.277501  | -2.717267 | 2.471959  |
| 6  | 3.929628  | 0.118223  | 2.143488  |
| 8  | 3.994670  | 1.358370  | 2.686122  |
| 6  | 5.246696  | 2.037345  | 2.512216  |
| 7  | -1.768784 | 1.542600  | 0.226894  |
| 6  | -3.134608 | 1.399761  | 0.401039  |
| 6  | -3.751708 | 2.707391  | 0.440167  |
| 6  | -2.749212 | 3.632986  | 0.276211  |
| 6  | -1.510783 | 2.899267  | 0.129844  |
| 6  | -5.225969 | 2.948945  | 0.563810  |
| 6  | -5.971950 | 2.754254  | -0.768881 |
| 6  | -3.802069 | 0.189321  | 0.518781  |
| 6  | -3.252539 | -1.081711 | 0.398441  |
| 7  | -1.931641 | -1.349559 | 0.160300  |
| 6  | -1.803395 | -2.710259 | 0.022947  |
| 6  | -3.100736 | -3.338053 | 0.219850  |
| 6  | -3.999051 | -2.329188 | 0.453916  |
| 6  | -0.262522 | 3.462510  | -0.091409 |
| 6  | 0.924345  | 2.786876  | -0.354300 |
| 7  | 1.054970  | 1.425954  | -0.414677 |
| 6  | 2.356498  | 1.149041  | -0.750592 |
| 6  | 3.095005  | 2.393313  | -0.884528 |



|   |           |           |           |
|---|-----------|-----------|-----------|
| 6 | 2.208214  | 3.410311  | -0.636554 |
| 6 | -2.871446 | 5.123749  | 0.176846  |
| 6 | -2.882068 | 5.621107  | -1.280202 |
| 6 | -0.623200 | -3.383486 | -0.257523 |
| 6 | 0.627437  | -2.821298 | -0.484849 |
| 7 | 0.901733  | -1.479393 | -0.477887 |
| 6 | 2.234374  | -1.331503 | -0.761930 |
| 6 | 2.850156  | -2.639900 | -0.902068 |
| 6 | 1.850052  | -3.564229 | -0.742452 |
| 6 | -3.364421 | -4.808094 | 0.090809  |
| 6 | -3.470924 | -5.265395 | -1.375527 |
| 6 | -5.483316 | -2.427244 | 0.640283  |
| 6 | -6.263632 | -2.158708 | -0.659649 |
| 6 | 2.897477  | -0.119176 | -0.897011 |
| 6 | 4.310416  | -2.865082 | -1.147304 |
| 6 | 4.716488  | -2.661827 | -2.617745 |
| 6 | 1.939871  | -5.056772 | -0.833948 |
| 6 | 1.499076  | -5.593881 | -2.207485 |
| 6 | 4.534013  | 2.482274  | -1.295302 |
| 6 | 4.728575  | 2.326124  | -2.814502 |
| 6 | 2.440600  | 4.889046  | -0.715674 |
| 6 | 1.987274  | 5.490074  | -2.058729 |
| 8 | 4.867317  | -0.417841 | 1.594222  |
| 7 | -0.833061 | 0.842787  | 2.819789  |
| 7 | -1.613075 | 1.648293  | 2.743728  |
| 1 | 3.956176  | -0.174005 | -1.112599 |
| 1 | -0.682759 | -4.464187 | -0.308848 |
| 1 | -4.870955 | 0.241903  | 0.687528  |
| 1 | -0.216082 | 4.545057  | -0.098297 |
| 1 | 1.915285  | 5.393881  | 0.104652  |
| 1 | 3.505661  | 5.098160  | -0.567210 |
| 1 | 0.922947  | 5.304197  | -2.231204 |
| 1 | 2.536819  | 5.036069  | -2.888513 |
| 1 | -2.045803 | 5.601431  | 0.718622  |
| 1 | -3.789685 | 5.448456  | 0.677718  |
| 1 | -5.399182 | 3.966007  | 0.931249  |
| 1 | -5.650469 | 2.277221  | 1.320132  |
| 1 | 4.946543  | 3.445508  | -0.974490 |
| 1 | 5.114401  | 1.709443  | -0.776564 |
| 1 | -5.809748 | -1.720218 | 1.413057  |
| 1 | -5.738244 | -3.424269 | 1.015518  |
| 1 | 2.156712  | 6.571360  | -2.083754 |
| 1 | -4.291830 | -5.058971 | 0.616905  |
| 1 | -2.569180 | -5.374868 | 0.590872  |
| 1 | -3.651127 | -6.343289 | -1.438883 |
| 1 | -2.552669 | -5.036432 | -1.924192 |
| 1 | -4.291722 | -4.748735 | -1.881641 |
| 1 | -5.991978 | -2.887085 | -1.429255 |
| 1 | -6.034843 | -1.164710 | -1.055409 |
| 1 | -7.343420 | -2.222525 | -0.490879 |
| 1 | -5.823956 | 1.741540  | -1.155279 |
| 1 | -5.598210 | 3.450531  | -1.525381 |
| 1 | -7.046472 | 2.923518  | -0.646143 |
| 1 | -2.957730 | 6.712346  | -1.322470 |
| 1 | -3.729236 | 5.196142  | -1.826491 |
| 1 | -1.970389 | 5.317599  | -1.803167 |
| 1 | 5.788532  | 2.380655  | -3.082224 |
| 1 | 4.195196  | 3.113407  | -3.355432 |
| 1 | 4.335175  | 1.365709  | -3.160003 |
| 1 | 4.571289  | -3.882239 | -0.837652 |

|   |           |           |           |
|---|-----------|-----------|-----------|
| 1 | 4.883742  | -2.196304 | -0.495607 |
| 1 | 5.790905  | -2.822439 | -2.752568 |
| 1 | 4.477669  | -1.650006 | -2.959874 |
| 1 | 4.181150  | -3.360182 | -3.268779 |
| 1 | 1.327988  | -5.515483 | -0.047508 |
| 1 | 2.970032  | -5.368475 | -0.633994 |
| 1 | 1.566298  | -6.686020 | -2.243988 |
| 1 | 2.130655  | -5.183341 | -3.000989 |
| 1 | 0.466879  | -5.305263 | -2.429144 |
| 1 | 1.639072  | 1.453337  | 2.073418  |
| 1 | -1.111001 | -1.841404 | 2.612251  |
| 1 | 0.818056  | -3.385329 | 2.898118  |
| 1 | 6.071056  | 1.423578  | 2.881208  |
| 1 | 5.162734  | 2.959089  | 3.087337  |
| 1 | 5.415138  | 2.262616  | 1.456631  |

---

**Bc1**

---

Number of imaginary frequencies : 0 Electronic energy : HF=-2950.3150711  
Zero-point correction= 0.981005 (Hartree/Particle)  
Thermal correction to Energy= 1.042430  
Thermal correction to Enthalpy= 1.043374  
Thermal correction to Gibbs Free Energy= 0.881245  
Sum of electronic and zero-point Energies= -2949.334066  
Sum of electronic and thermal Energies= -2949.272641  
Sum of electronic and thermal Enthalpies= -2949.271697  
Sum of electronic and thermal Free Energies= -2949.433826

.....  
Cartesian Coordinates

.....

|    |           |           |           |
|----|-----------|-----------|-----------|
| 6  | 4.982888  | 2.469949  | 1.519654  |
| 6  | 3.738802  | 2.256561  | 1.955828  |
| 6  | 3.133293  | 0.890325  | 2.095117  |
| 6  | 4.032280  | -0.208903 | 1.606406  |
| 6  | 5.276398  | 0.002278  | 1.171276  |
| 6  | 5.918469  | 1.363028  | 1.113954  |
| 6  | 2.311784  | 0.120531  | -1.331977 |
| 7  | 1.172010  | -0.595910 | -1.073127 |
| 6  | 1.419613  | -1.904909 | -1.416878 |
| 6  | 2.786897  | -2.026360 | -1.889974 |
| 6  | 3.338029  | -0.772015 | -1.841977 |
| 6  | 2.458324  | 1.487535  | -1.151496 |
| 6  | 1.483378  | 2.377858  | -0.724374 |
| 7  | 0.201170  | 2.042414  | -0.367552 |
| 6  | -0.458454 | 3.208239  | -0.047914 |
| 6  | 0.454302  | 4.327316  | -0.185111 |
| 6  | 1.656570  | 3.813796  | -0.604450 |
| 6  | -1.788642 | 3.302418  | 0.334706  |
| 6  | -2.699682 | 2.257266  | 0.452480  |
| 6  | -4.092291 | 2.389840  | 0.840261  |
| 6  | -4.621125 | 1.122986  | 0.854075  |
| 6  | -3.552164 | 0.216034  | 0.470835  |
| 7  | -2.409996 | 0.936921  | 0.242487  |
| 6  | -4.788446 | 3.694384  | 1.086294  |
| 6  | -5.178591 | 4.413246  | -0.218074 |
| 77 | -0.588734 | 0.160038  | -0.347309 |
| 17 | -1.396991 | 0.464917  | -2.664950 |
| 6  | -3.680407 | -1.160522 | 0.329513  |
| 6  | -2.715790 | -2.053041 | -0.121015 |

|   |           |           |           |
|---|-----------|-----------|-----------|
| 7 | -1.429291 | -1.728772 | -0.462562 |
| 6 | -0.811387 | -2.868603 | -0.897289 |
| 6 | -1.742429 | -3.979941 | -0.822428 |
| 6 | -2.923758 | -3.474750 | -0.338836 |
| 6 | -6.037278 | 0.709686  | 1.118976  |
| 6 | -6.842087 | 0.491182  | -0.175411 |
| 6 | 2.912975  | 4.549550  | -0.957799 |
| 6 | 3.075157  | 4.756063  | -2.474713 |
| 6 | 0.079591  | 5.763781  | 0.022975  |
| 6 | -0.659472 | 6.365250  | -1.186423 |
| 6 | 0.509790  | -2.948169 | -1.326445 |
| 6 | 3.405977  | -3.296135 | -2.390792 |
| 6 | 2.997624  | -3.629496 | -3.837171 |
| 6 | 4.699235  | -0.333811 | -2.285384 |
| 6 | 4.695820  | 0.278049  | -3.697805 |
| 6 | -1.441109 | -5.376760 | -1.275255 |
| 6 | -1.523483 | -5.535673 | -2.804357 |
| 6 | -4.226530 | -4.187933 | -0.137256 |
| 6 | -5.199909 | -3.987011 | -1.313276 |
| 6 | -0.178710 | -0.197228 | 1.507760  |
| 6 | 0.490543  | -1.423184 | 1.888038  |
| 6 | 0.947826  | -1.658608 | 3.146501  |
| 6 | 0.715317  | -0.660597 | 4.224453  |
| 6 | -0.083027 | 0.520995  | 3.841927  |
| 6 | -0.515031 | 0.723034  | 2.574963  |
| 6 | 1.671868  | -2.923373 | 3.458433  |
| 8 | 2.387996  | -3.345356 | 2.383446  |
| 6 | 3.072016  | -4.593962 | 2.565513  |
| 8 | 1.176326  | -0.772100 | 5.356952  |
| 8 | 1.622573  | -3.525277 | 4.506258  |
| 1 | -4.651775 | -1.579638 | 0.563123  |
| 1 | -2.159784 | 4.296145  | 0.554819  |
| 1 | 3.431873  | 1.905145  | -1.372075 |
| 1 | 0.863742  | -3.926964 | -1.626512 |
| 1 | -0.441622 | -5.671912 | -0.932064 |
| 1 | -2.141113 | -6.072119 | -0.799942 |
| 1 | -0.824671 | -4.859824 | -3.306296 |
| 1 | -2.527811 | -5.292430 | -3.163405 |
| 1 | 3.128210  | -4.128981 | -1.732450 |
| 1 | 4.496628  | -3.214855 | -2.331744 |
| 1 | 5.382837  | -1.189303 | -2.260940 |
| 1 | 5.098383  | 0.392568  | -1.569744 |
| 1 | -4.038228 | -5.258314 | -0.001622 |
| 1 | -4.699770 | -3.844073 | 0.790539  |
| 1 | 3.776383  | 4.002429  | -0.563318 |
| 1 | 2.915241  | 5.524252  | -0.457887 |
| 1 | -1.288691 | -6.561328 | -3.106508 |
| 1 | 0.983207  | 6.349283  | 0.223141  |
| 1 | -0.547655 | 5.859674  | 0.917850  |
| 1 | -0.930404 | 7.409671  | -1.001782 |
| 1 | -1.573813 | 5.805473  | -1.404706 |
| 1 | -0.030656 | 6.325898  | -2.080733 |
| 1 | 2.242895  | 5.340600  | -2.878043 |
| 1 | 3.087007  | 3.797366  | -3.001717 |
| 1 | 4.007184  | 5.283949  | -2.700606 |
| 1 | 4.027773  | 1.143131  | -3.747306 |
| 1 | 4.343960  | -0.449485 | -4.435277 |
| 1 | 5.700560  | 0.602391  | -3.987204 |
| 1 | 3.456134  | -4.566260 | -4.169813 |
| 1 | 3.310168  | -2.832596 | -4.518357 |

|   |           |           |           |
|---|-----------|-----------|-----------|
| 1 | 1.911490  | -3.727314 | -3.925123 |
| 1 | -6.145538 | -4.508508 | -1.134037 |
| 1 | -4.766681 | -4.369413 | -2.242195 |
| 1 | -5.415189 | -2.925227 | -1.465791 |
| 1 | -6.531626 | 1.473800  | 1.728341  |
| 1 | -6.051589 | -0.209961 | 1.716600  |
| 1 | -7.867050 | 0.177919  | 0.047353  |
| 1 | -6.375381 | -0.275273 | -0.801253 |
| 1 | -6.883954 | 1.412562  | -0.763702 |
| 1 | -4.146892 | 4.352184  | 1.685933  |
| 1 | -5.687241 | 3.519631  | 1.687200  |
| 1 | -5.674434 | 5.366470  | -0.008659 |
| 1 | -5.858629 | 3.794274  | -0.810662 |
| 1 | -4.296614 | 4.611491  | -0.834405 |
| 1 | 0.685615  | -2.159268 | 1.120827  |
| 1 | -1.072877 | 1.617434  | 2.327441  |
| 1 | -0.269912 | 1.234662  | 4.638393  |
| 1 | 3.594993  | -4.779775 | 1.627814  |
| 1 | 2.359038  | -5.394924 | 2.776405  |
| 1 | 3.779136  | -4.524616 | 3.395381  |
| 1 | 2.858734  | 0.709971  | 3.147070  |
| 1 | 3.108752  | 3.100959  | 2.226545  |
| 1 | 3.624980  | -1.216399 | 1.619078  |
| 1 | 5.364625  | 3.486804  | 1.450629  |
| 1 | 5.878573  | -0.838052 | 0.831840  |
| 1 | 6.302960  | 1.554454  | 0.098466  |
| 1 | 2.179229  | 0.856284  | 1.553495  |
| 1 | 6.818430  | 1.381506  | 1.750269  |

---

**TS(B-D)<sub>Cl</sub>**

Number of imaginary frequencies : 1 Electronic energy : HF=-2950.2896246  
 Zero-point correction= 0.976374 (Hartree/Particle)  
 Thermal correction to Energy= 1.036678  
 Thermal correction to Enthalpy= 1.037622  
 Thermal correction to Gibbs Free Energy= 0.878352  
 Sum of electronic and zero-point Energies= -2949.318168  
 Sum of electronic and thermal Energies= -2949.257864  
 Sum of electronic and thermal Enthalpies= -2949.256920  
 Sum of electronic and thermal Free Energies= -2949.416190

.....  
 Cartesian Coordinates  
 .....

|    |           |           |           |
|----|-----------|-----------|-----------|
| 6  | 0.481266  | -1.685523 | 3.932224  |
| 6  | 1.443991  | -1.498937 | 2.844053  |
| 6  | 2.616087  | -0.670405 | 3.133784  |
| 6  | 2.688780  | 0.069817  | 4.253822  |
| 6  | 1.619782  | 0.061169  | 5.303314  |
| 6  | 0.535840  | -0.941997 | 5.049841  |
| 6  | -2.400055 | 0.237642  | 2.244415  |
| 6  | -1.368655 | -0.529403 | 1.819326  |
| 6  | -0.077335 | 0.064651  | 1.473451  |
| 6  | 0.232705  | 1.321324  | 2.154516  |
| 6  | -0.759159 | 2.088128  | 2.649762  |
| 6  | -2.173021 | 1.653777  | 2.634737  |
| 77 | 0.313953  | 0.028959  | -0.539577 |
| 6  | -3.780471 | -0.315423 | 2.183518  |
| 8  | -3.793495 | -1.625276 | 2.539109  |
| 6  | -5.040397 | -2.302411 | 2.329229  |

|   |           |           |           |
|---|-----------|-----------|-----------|
| 8 | -3.073217 | 2.406855  | 2.993147  |
| 7 | -1.421761 | -1.036889 | -0.874022 |
| 6 | -1.540641 | -2.401749 | -0.903600 |
| 6 | -2.937898 | -2.760844 | -1.093183 |
| 6 | -3.642538 | -1.585632 | -1.164992 |
| 6 | -2.676993 | -0.508412 | -1.016899 |
| 6 | -3.443727 | -4.163486 | -1.245472 |
| 6 | -3.193024 | -4.733019 | -2.653343 |
| 6 | -0.496336 | -3.296286 | -0.705610 |
| 6 | 0.843268  | -2.986626 | -0.497729 |
| 7 | 1.367995  | -1.717655 | -0.436286 |
| 6 | 2.727133  | -1.836630 | -0.273466 |
| 6 | 3.079605  | -3.241055 | -0.195383 |
| 6 | 1.911004  | -3.954173 | -0.330065 |
| 6 | -2.994240 | 0.840399  | -0.930997 |
| 6 | -2.109719 | 1.895906  | -0.758993 |
| 7 | -0.746090 | 1.786796  | -0.680181 |
| 6 | -0.236984 | 3.051127  | -0.557008 |
| 6 | -1.328233 | 4.013145  | -0.543662 |
| 6 | -2.491058 | 3.294829  | -0.650330 |
| 6 | -5.109226 | -1.378634 | -1.395847 |
| 6 | -5.427679 | -0.920934 | -2.830499 |
| 6 | 3.622427  | -0.776358 | -0.183887 |
| 6 | 3.316346  | 0.578325  | -0.220482 |
| 7 | 2.053347  | 1.099165  | -0.316053 |
| 6 | 2.169249  | 2.466787  | -0.334403 |
| 6 | 3.572808  | 2.832624  | -0.221581 |
| 6 | 4.283856  | 1.662492  | -0.151565 |
| 6 | 4.479031  | -3.765486 | -0.074011 |
| 6 | 5.232783  | -3.761320 | -1.416524 |
| 6 | 1.734741  | -5.441677 | -0.395318 |
| 6 | 1.647232  | -5.964621 | -1.840848 |
| 6 | 1.111136  | 3.361802  | -0.421231 |
| 6 | 4.092874  | 4.237692  | -0.268348 |
| 6 | 4.150150  | 4.800332  | -1.700296 |
| 6 | 5.770480  | 1.476074  | -0.102535 |
| 6 | 6.373801  | 1.155561  | -1.482261 |
| 6 | -1.156445 | 5.499586  | -0.463998 |
| 6 | -0.781361 | 6.125804  | -1.819379 |
| 6 | -3.905933 | 3.787532  | -0.663412 |
| 6 | -4.502517 | 3.870391  | -2.079771 |
| 8 | -4.764435 | 0.285759  | 1.809463  |
| 1 | 1.361900  | 4.414705  | -0.368209 |
| 1 | 4.669749  | -1.035034 | -0.079462 |
| 1 | -0.750729 | -4.349610 | -0.724534 |
| 1 | -4.045746 | 1.092872  | -0.967788 |
| 1 | -4.518818 | 3.131154  | -0.034388 |
| 1 | -3.946939 | 4.776764  | -0.195585 |
| 1 | -4.487559 | 2.893523  | -2.572596 |
| 1 | -3.924636 | 4.559567  | -2.703442 |
| 1 | -5.490788 | -0.643876 | -0.676710 |
| 1 | -5.644718 | -2.312816 | -1.191599 |
| 1 | -4.517436 | -4.189312 | -1.030020 |
| 1 | -2.969615 | -4.814447 | -0.499806 |
| 1 | -2.084525 | 5.952092  | -0.099374 |
| 1 | -0.386602 | 5.747285  | 0.277541  |
| 1 | 0.829936  | -5.734261 | 0.151703  |
| 1 | 2.570221  | -5.931259 | 0.116884  |
| 1 | -5.538816 | 4.221724  | -2.048482 |
| 1 | 4.453331  | -4.785789 | 0.323775  |

|    |           |           |           |
|----|-----------|-----------|-----------|
| 1  | 5.038416  | -3.169002 | 0.657585  |
| 1  | 6.254278  | -4.136070 | -1.295491 |
| 1  | 5.282872  | -2.751194 | -1.833463 |
| 1  | 4.719504  | -4.391768 | -2.148472 |
| 1  | 2.561994  | -5.728035 | -2.392133 |
| 1  | 0.813783  | -5.498692 | -2.374616 |
| 1  | 1.505454  | -7.050020 | -1.858677 |
| 1  | -2.125092 | -4.728215 | -2.891200 |
| 1  | -3.699155 | -4.124771 | -3.408773 |
| 1  | -3.560415 | -5.761193 | -2.734917 |
| 1  | -6.503432 | -0.768086 | -2.963335 |
| 1  | -5.092602 | -1.666924 | -3.557590 |
| 1  | -4.916090 | 0.017093  | -3.064603 |
| 1  | -0.652690 | 7.209520  | -1.731134 |
| 1  | -1.561441 | 5.930913  | -2.561351 |
| 1  | 0.149845  | 5.698943  | -2.204365 |
| 1  | 5.094151  | 4.271294  | 0.174878  |
| 1  | 3.464410  | 4.888953  | 0.352152  |
| 1  | 4.520054  | 5.830755  | -1.703976 |
| 1  | 3.159674  | 4.787127  | -2.164272 |
| 1  | 4.812215  | 4.194236  | -2.325713 |
| 1  | 6.023579  | 0.670783  | 0.599125  |
| 1  | 6.239048  | 2.382464  | 0.296083  |
| 1  | 7.457039  | 1.011215  | -1.415078 |
| 1  | 6.177626  | 1.969831  | -2.185888 |
| 1  | 5.929538  | 0.247957  | -1.901346 |
| 1  | -1.538534 | -1.569437 | 1.572307  |
| 1  | 1.256294  | 1.676368  | 2.127358  |
| 1  | -0.581296 | 3.086638  | 3.036612  |
| 1  | -4.929167 | -3.279131 | 2.800161  |
| 1  | -5.228408 | -2.417940 | 1.259082  |
| 1  | -5.863800 | -1.745195 | 2.780250  |
| 1  | 0.804781  | -0.792284 | 1.904671  |
| 1  | 3.400931  | -0.633440 | 2.387446  |
| 1  | -0.314821 | -2.409823 | 3.792809  |
| 1  | 3.557498  | 0.698289  | 4.432506  |
| 1  | -0.213383 | -1.072136 | 5.825991  |
| 1  | 2.068894  | -0.116721 | 6.293459  |
| 1  | 1.610063  | -2.352538 | 2.185930  |
| 1  | 1.176852  | 1.066772  | 5.385288  |
| 17 | 0.661607  | 0.099204  | -2.963537 |

---

**D<sub>CI</sub>**

---

Number of imaginary frequencies : 0 Electronic energy : HF=-2950.3323129  
Zero-point correction= 0.981880 (Hartree/Particle)  
Thermal correction to Energy= 1.042403  
Thermal correction to Enthalpy= 1.043348  
Thermal correction to Gibbs Free Energy= 0.883558  
Sum of electronic and zero-point Energies= -2949.350433  
Sum of electronic and thermal Energies= -2949.289910  
Sum of electronic and thermal Enthalpies= -2949.288965  
Sum of electronic and thermal Free Energies= -2949.448755

.....  
Cartesian Coordinates  
.....

|   |          |           |          |
|---|----------|-----------|----------|
| 6 | 2.201260 | -0.061304 | 3.098402 |
| 6 | 0.747616 | -0.342111 | 3.369527 |
| 6 | 0.319134 | 0.076886  | 4.751042 |

|    |           |           |           |
|----|-----------|-----------|-----------|
| 6  | 1.110769  | 0.743141  | 5.592894  |
| 6  | 2.530047  | 1.124527  | 5.275106  |
| 6  | 2.990472  | 0.606769  | 3.940723  |
| 6  | -0.150224 | 0.366695  | 2.294370  |
| 6  | -1.539745 | -0.161445 | 2.263187  |
| 6  | -2.634282 | 0.620942  | 2.216300  |
| 6  | -2.513447 | 2.109062  | 2.228385  |
| 6  | -1.136876 | 2.639393  | 2.298552  |
| 6  | -0.054595 | 1.851687  | 2.334423  |
| 6  | -3.977807 | -0.004170 | 2.051426  |
| 8  | -4.028604 | -1.210192 | 2.668031  |
| 6  | -5.227842 | -1.965859 | 2.448571  |
| 8  | -3.483891 | 2.857056  | 2.212139  |
| 8  | -4.903087 | 0.466102  | 1.424553  |
| 77 | 0.356881  | -0.136820 | -0.652855 |
| 17 | 0.675661  | -0.430158 | -2.938572 |
| 7  | 2.105568  | 0.923026  | -0.498953 |
| 6  | 3.365244  | 0.395097  | -0.345870 |
| 6  | 4.342914  | 1.469196  | -0.340323 |
| 6  | 3.647123  | 2.640546  | -0.498692 |
| 6  | 2.242502  | 2.285128  | -0.604638 |
| 6  | 5.825680  | 1.272090  | -0.241732 |
| 6  | 6.456974  | 0.839382  | -1.577483 |
| 6  | 3.652413  | -0.953735 | -0.181756 |
| 6  | 2.742830  | -2.003513 | -0.137095 |
| 7  | 1.380766  | -1.874230 | -0.263329 |
| 6  | 0.839320  | -3.133029 | -0.163789 |
| 6  | 1.899630  | -4.099727 | 0.061654  |
| 6  | 3.079599  | -3.400129 | 0.074244  |
| 6  | 1.194624  | 3.182684  | -0.764242 |
| 6  | -0.154440 | 2.877826  | -0.874112 |
| 7  | -0.680211 | 1.607544  | -0.872987 |
| 6  | -2.044637 | 1.733438  | -0.995531 |
| 6  | -2.404049 | 3.140750  | -1.022280 |
| 6  | -1.232183 | 3.849016  | -0.958033 |
| 6  | 4.184371  | 4.034856  | -0.618210 |
| 6  | 4.278157  | 4.511352  | -2.079148 |
| 6  | -0.511943 | -3.433267 | -0.279132 |
| 6  | -1.546489 | -2.545592 | -0.543008 |
| 7  | -1.403098 | -1.185758 | -0.692695 |
| 6  | -2.651050 | -0.669127 | -0.942505 |
| 6  | -3.628871 | -1.743253 | -0.961046 |
| 6  | -2.945651 | -2.904678 | -0.699652 |
| 6  | 1.694282  | -5.580561 | 0.173744  |
| 6  | 1.526165  | -6.262213 | -1.196470 |
| 6  | 4.475573  | -3.929873 | 0.207926  |
| 6  | 5.191864  | -4.066054 | -1.148026 |
| 6  | -2.943577 | 0.681224  | -1.066197 |
| 6  | -5.082677 | -1.559078 | -1.277762 |
| 6  | -5.335291 | -1.312447 | -2.776103 |
| 6  | -3.475218 | -4.306724 | -0.658289 |
| 6  | -3.251923 | -5.064046 | -1.979726 |
| 6  | -3.811781 | 3.649491  | -1.083893 |
| 6  | -4.406986 | 3.604967  | -2.502357 |
| 6  | -1.041687 | 5.335086  | -0.990251 |
| 6  | -0.651395 | 5.853585  | -2.386106 |
| 1  | 1.457389  | 4.233556  | -0.795650 |
| 1  | 4.697151  | -1.214108 | -0.058804 |
| 1  | -0.786058 | -4.476127 | -0.170084 |
| 1  | -3.988574 | 0.942804  | -1.163884 |

|   |           |           |           |
|---|-----------|-----------|-----------|
| 1 | -4.430659 | 3.066967  | -0.392231 |
| 1 | -3.837789 | 4.678920  | -0.712284 |
| 1 | -4.408090 | 2.585482  | -2.900310 |
| 1 | -3.820828 | 4.223309  | -3.189667 |
| 1 | -5.482332 | -0.726362 | -0.688620 |
| 1 | -5.638367 | -2.450458 | -0.964979 |
| 1 | -4.546820 | -4.285484 | -0.431750 |
| 1 | -3.003330 | -4.859766 | 0.163469  |
| 1 | -1.966076 | 5.824607  | -0.666767 |
| 1 | -0.272713 | 5.628520  | -0.264503 |
| 1 | 0.813462  | -5.788857 | 0.793731  |
| 1 | 2.545462  | -6.028103 | 0.698192  |
| 1 | -5.438139 | 3.972170  | -2.504964 |
| 1 | 4.448942  | -4.906708 | 0.702686  |
| 1 | 5.061272  | -3.274130 | 0.864283  |
| 1 | 6.211124  | -4.444276 | -1.019082 |
| 1 | 5.245210  | -3.101276 | -1.661319 |
| 1 | 4.649562  | -4.755011 | -1.802414 |
| 1 | 2.416182  | -6.109838 | -1.814243 |
| 1 | 0.674534  | -5.842455 | -1.740213 |
| 1 | 1.365821  | -7.339331 | -1.083817 |
| 1 | -2.187271 | -5.110770 | -2.227798 |
| 1 | -3.758639 | -4.554052 | -2.804374 |
| 1 | -3.636790 | -6.087169 | -1.918573 |
| 1 | -6.402917 | -1.174817 | -2.974659 |
| 1 | -4.979576 | -2.156962 | -3.374411 |
| 1 | -4.805322 | -0.419870 | -3.121134 |
| 1 | -0.510837 | 6.939320  | -2.378727 |
| 1 | -1.429748 | 5.612306  | -3.116205 |
| 1 | 0.277476  | 5.389348  | -2.731765 |
| 1 | 5.176563  | 4.084487  | -0.156774 |
| 1 | 3.551131  | 4.727979  | -0.050364 |
| 1 | 4.661991  | 5.535060  | -2.135789 |
| 1 | 3.297065  | 4.484296  | -2.562544 |
| 1 | 4.944859  | 3.861603  | -2.653998 |
| 1 | 6.051644  | 0.521991  | 0.526655  |
| 1 | 6.295523  | 2.202070  | 0.096060  |
| 1 | 7.536861  | 0.692080  | -1.473983 |
| 1 | 6.285256  | 1.597584  | -2.347317 |
| 1 | 6.014557  | -0.095492 | -1.934374 |
| 1 | -1.649340 | -1.240758 | 2.230569  |
| 1 | 0.946379  | 2.268672  | 2.379594  |
| 1 | -1.061300 | 3.721433  | 2.315491  |
| 1 | -5.197454 | -2.784081 | 3.167942  |
| 1 | -5.238900 | -2.358819 | 1.429330  |
| 1 | -6.110261 | -1.342535 | 2.604430  |
| 1 | 0.347374  | 0.022318  | 1.340470  |
| 1 | 2.591638  | -0.416706 | 2.149753  |
| 1 | -0.703204 | -0.161609 | 5.035377  |
| 1 | 4.029186  | 0.786326  | 3.671278  |
| 1 | 0.731079  | 1.033465  | 6.570143  |
| 1 | 3.200639  | 0.759605  | 6.068691  |
| 1 | 0.563037  | -1.418369 | 3.231916  |
| 1 | 2.636946  | 2.220733  | 5.309706  |

---

CHD-TEMPO

---

Number of imaginary frequencies : 0 Electronic energy : HF=-717.2626838



Zero-point correction= 0.386820 (Hartree/Particle)  
 Thermal correction to Energy= 0.405889  
 Thermal correction to Enthalpy= 0.406833  
 Thermal correction to Gibbs Free Energy= 0.338892  
 Sum of electronic and zero-point Energies= -716.875864  
 Sum of electronic and thermal Energies= -716.856795  
 Sum of electronic and thermal Enthalpies= -716.855851  
 Sum of electronic and thermal Free Energies= -716.923791

.....  
 Cartesian Coordinates  
 .....

|   |           |           |           |
|---|-----------|-----------|-----------|
| 6 | 0.938000  | 1.357471  | -0.357763 |
| 6 | 1.996962  | -1.022035 | 0.081518  |
| 6 | 1.890558  | -0.710085 | 1.584357  |
| 6 | 1.998057  | 0.780278  | 1.902837  |
| 6 | 0.889494  | 1.533650  | 1.169798  |
| 1 | 0.921639  | -1.074423 | 1.946192  |
| 1 | 2.663775  | -1.283935 | 2.107148  |
| 1 | 1.904940  | 0.937172  | 2.982938  |
| 1 | 2.984113  | 1.166603  | 1.620078  |
| 1 | -0.080134 | 1.165810  | 1.525055  |
| 1 | 0.929315  | 2.606287  | 1.389621  |
| 6 | -0.389732 | 1.817649  | -0.969486 |
| 1 | -0.559496 | 2.866807  | -0.708430 |
| 1 | -0.371457 | 1.719699  | -2.054942 |
| 1 | -1.220332 | 1.224836  | -0.586002 |
| 6 | 2.089844  | 2.159562  | -0.993954 |
| 1 | 2.186017  | 1.882498  | -2.046427 |
| 1 | 1.870957  | 3.230001  | -0.933107 |
| 1 | 3.047477  | 1.985313  | -0.499661 |
| 6 | 1.513785  | -2.452559 | -0.187279 |
| 1 | 1.605279  | -2.699092 | -1.244932 |
| 1 | 2.115503  | -3.153170 | 0.399231  |
| 1 | 0.467221  | -2.568507 | 0.101955  |
| 6 | 3.443785  | -0.882651 | -0.431154 |
| 1 | 4.059558  | -1.691801 | -0.026557 |
| 1 | 3.449101  | -0.951025 | -1.521497 |
| 1 | 3.901786  | 0.064254  | -0.139943 |
| 7 | 1.106072  | -0.095189 | -0.687628 |
| 8 | 0.864036  | -0.430478 | -1.905204 |
| 1 | -1.355411 | -1.298218 | -1.240048 |
| 6 | -2.293454 | -1.428057 | -0.678935 |
| 6 | -2.039404 | -1.241592 | 0.791568  |
| 6 | -3.333941 | -0.480571 | -1.209899 |
| 6 | -2.625089 | -0.298286 | 1.533077  |
| 1 | -1.339216 | -1.928537 | 1.261313  |
| 6 | -3.923119 | 0.462538  | -0.472263 |
| 1 | -3.594157 | -0.581324 | -2.261266 |
| 6 | -3.620766 | 0.688252  | 0.985043  |
| 1 | -2.392096 | -0.223785 | 2.593560  |
| 1 | -4.660619 | 1.120759  | -0.926606 |
| 1 | -4.550930 | 0.645350  | 1.573620  |
| 1 | -2.598891 | -2.468066 | -0.874745 |
| 1 | -3.248610 | 1.715255  | 1.133679  |

-----  
 TS(CHD-TEMPO)  
 -----

Number of imaginary frequencies : 1 Electronic energy : HF=-717.2373741  
 Zero-point correction= 0.380689 (Hartree/Particle)

|                                              |             |
|----------------------------------------------|-------------|
| Thermal correction to Energy=                | 0.398903    |
| Thermal correction to Enthalpy=              | 0.399847    |
| Thermal correction to Gibbs Free Energy=     | 0.334697    |
| Sum of electronic and zero-point Energies=   | -716.842655 |
| Sum of electronic and thermal Energies=      | -716.824441 |
| Sum of electronic and thermal Enthalpies=    | -716.823497 |
| Sum of electronic and thermal Free Energies= | -716.888647 |

.....  
Cartesian Coordinates  
.....

|   |           |           |           |
|---|-----------|-----------|-----------|
| 6 | -0.969177 | -1.342860 | 0.170867  |
| 6 | -1.962050 | 1.071112  | 0.036911  |
| 6 | -3.262685 | 0.441240  | -0.499738 |
| 6 | -3.034246 | -0.861900 | -1.263084 |
| 6 | -2.321615 | -1.862358 | -0.354628 |
| 1 | -3.922089 | 0.236802  | 0.352740  |
| 1 | -3.770107 | 1.183056  | -1.126122 |
| 1 | -3.993629 | -1.273478 | -1.595321 |
| 1 | -2.447119 | -0.679698 | -2.170506 |
| 1 | -2.966505 | -2.080065 | 0.505729  |
| 1 | -2.146382 | -2.811312 | -0.873003 |
| 6 | -0.492086 | -2.241841 | 1.321178  |
| 1 | -0.456650 | -3.280896 | 0.979511  |
| 1 | 0.503065  | -1.950249 | 1.658657  |
| 1 | -1.179512 | -2.173054 | 2.168266  |
| 6 | 0.098117  | -1.366410 | -0.944027 |
| 1 | 1.017460  | -0.895207 | -0.601105 |
| 1 | 0.325893  | -2.405263 | -1.204186 |
| 1 | -0.228856 | -0.858866 | -1.852530 |
| 6 | -2.319538 | 2.135016  | 1.086013  |
| 1 | -1.425659 | 2.642274  | 1.450646  |
| 1 | -2.991607 | 2.875882  | 0.642136  |
| 1 | -2.820724 | 1.671586  | 1.939817  |
| 6 | -1.161266 | 1.744068  | -1.096593 |
| 1 | -1.700245 | 2.626794  | -1.454964 |
| 1 | -0.187320 | 2.068494  | -0.727965 |
| 1 | -0.997793 | 1.081430  | -1.947629 |
| 7 | -1.184573 | 0.014082  | 0.727876  |
| 8 | -0.181888 | 0.474789  | 1.500974  |
| 1 | 0.822884  | 0.775444  | 0.949262  |
| 6 | 2.185990  | 1.181938  | 0.749122  |
| 6 | 2.906797  | 0.027670  | 1.285489  |
| 6 | 2.449444  | 1.492965  | -0.651391 |
| 6 | 3.604334  | -0.819675 | 0.503942  |
| 1 | 2.832004  | -0.163030 | 2.353173  |
| 6 | 3.146750  | 0.669648  | -1.461277 |
| 1 | 2.055575  | 2.423595  | -1.052846 |
| 6 | 3.762109  | -0.615554 | -0.978806 |
| 1 | 4.093498  | -1.686405 | 0.941355  |
| 1 | 3.299730  | 0.934022  | -2.504620 |
| 1 | 4.830765  | -0.644717 | -1.251939 |
| 1 | 2.088352  | 2.038651  | 1.419912  |
| 1 | 3.326823  | -1.471021 | -1.525250 |
